# Supplementary material
Source: PubMed Central journal article supplement (PMC6203954)
Supplement: NIHMS79184-supplement-Supplementary_Information.pdf [file NIHMS79184-supplement-Supplementary_Information.pdf]

# **A Protein Functionalization Platform Based On Selective Reactions at Methionine Residues.**

Michael T. Taylor, Jennifer E. Nelson, Marcos G. Suero, Matthew J. Gaunt\*.

Department of Chemistry, University of Cambridge, Lensfield Road, Cambridge, United Kingdom. CB2 1EW.

[\\*mjb32@cam.ac.uk](mailto:*mjb32@cam.ac.uk)

Supplementary Information

## Table of Contents

|                                                                                               |     |
|-----------------------------------------------------------------------------------------------|-----|
| General Information                                                                           | 2   |
| General Synthetic Procedures                                                                  | 5   |
| Synthesis of Iodonium Salts                                                                   | 5   |
| Initial Reaction Optimisation on Model Peptides                                               | 19  |
| Protein Modification                                                                          | 21  |
| General Procedures for Protein Modification                                                   | 22  |
| Phosphine Promoted “de-ligation”                                                              | 66  |
| Photochemical Reduction of $\alpha$ -sulfonium diazoesters                                    | 70  |
| Photochemical Alkylation                                                                      | 95  |
| Synthesis of C-4 substituted Hantzsch Esters                                                  | 99  |
| Stability Studies                                                                             | 115 |
| Mass spectral characteristics of $\alpha$ -sulfonium diazoester containing protein conjugates | 122 |
| Mass-based search for products resulting from “cyanogen bromide-type” backbone hydrolysis     | 128 |
| References                                                                                    | 132 |
| NMR Spectra                                                                                   | 133 |

## General Information

Proton nuclear magnetic resonance ( $^1\text{H}$  NMR) spectra were recorded at ambient temperature on a Bruker AM 400 (400 MHz) or an Avance 500 (500 MHz) spectrometer. Chemical shifts ( $\delta$ ) are reported in ppm and quoted to the nearest 0.01 ppm relative to the residual protons in chloroform-d (7.26 ppm) or acetonitrile-d<sub>3</sub> (1.94 ppm) and coupling constants (J) are quoted in Hertz (Hz). Data are reported as follows: Chemical shift ( $\delta$ ), multiplicity, coupling constants, number of protons). Multiplicity is reported according to the following convention: s = singlet, d = doublet, t = triplet, q = quartet, qn = quintet, sext = sextet, sp = septet, m = multiplet, br = broad. Where coincident coupling constants have been observed, the apparent (app) multiplicity of the proton resonance has been reported. Carbon nuclear magnetic resonance ( $^{13}\text{C}$  NMR) spectra were recorded at ambient temperature on a Bruker AM 400 (100 MHz) or an Avance 500 (125 MHz) spectrometer.  $^{19}\text{F}$  NMR spectra were recorded at 376 MHz on a Bruker AVIII spectrometer. Chemical shifts for  $^{19}\text{F}$  NMR are reported with respect to fluorobenzene ( $\text{C}_6\text{H}_5\text{F}$ ;  $\delta\text{F} = -115.3$  ppm in acetonitrile-d<sub>3</sub>)<sup>1</sup> added as internal standard. Chemical shift ( $\delta$ ) was measured in ppm and quoted to the nearest 0.1 ppm relative to the residual solvent peaks in chloroform-d (77.16 ppm) or acetonitrile-d<sub>3</sub> (1.32 ppm). Infrared (IR) spectra were recorded on a Perkin Elmer 1FT-IR Spectrometer fitted with an ATR sampling accessory as either solids or neat films, either through direct application or deposited in chloroform, with absorptions reported in wavenumbers ( $\text{cm}^{-1}$ ). Analytical thin layer chromatography (TLC) was performed using pre-coated Merck glass backed silica gel plates (Silicagel 60 F254). Flash column chromatography was performed using Material Harvest silica gel (230–400 mesh) under a positive pressure of compressed air unless otherwise stated. Visualization was achieved using ultraviolet light (254 nm) or with basic potassium permanganate solutions as appropriate. X-ray crystallography was performed on a Nonius Kappa CCD at the Cambridge University Chemistry X-Ray Laboratory. Tetrahydrofuran, toluene, hexane, diethyl ether and dichloromethane were dried and distilled using standard methods. For reactions requiring degassed solvents, the solvents were sparged with a positive pressure of nitrogen for a minimum of one hour before use. High-resolution mass spectrometry was performed by the University of Cambridge, Department of Chemistry Mass Spectrometry Service. MS/MS spectra were obtained by the Protein and Nucleic Acids Facility at the University of Cambridge, Department of Biochemistry. Circular Dichroism experiments were performed on an Applied Photophysics Chirascan Circular Dichroism Spectrophotometer. We thank Dr. Marco Di Antonio for his assistance in acquiring CD spectra.

Reactions that did not involve protein modification were carried out using glassware that was dried under vacuum using a heat gun and run under an atmosphere of nitrogen unless otherwise stated. All reactions were monitored by TLC or LCMS (Shimadzu LCMS 2020, method: 5-95%B over 3.5 min, then hold 0.5 min, then 95-5%B over 0.5 min min, hold 0.5 min, 0.7 mL/min) as appropriate. 2,4-difluorophenyl- $\lambda^3$ -iodanediyl diacetate<sup>2</sup>, (*o*-tolyl)- $\lambda^3$ -iodanediyl diacetate<sup>2</sup>, *N,N'*-ditosyl hydrazine<sup>3</sup>, propargyl diazoacetate<sup>3</sup>,  $\alpha$ -diazobenzophenone<sup>3</sup>, 5(6)-carboxyfluorescein diacetate<sup>4</sup> and methyl (*tert*-butoxycarbonyl)-*L*-methioninate<sup>5</sup> and iodonium salt **1a**<sup>6</sup> were prepared according to literature procedures. Exenatide•OAc, Teriparatide•OAc, and Aviptadil•OAc were purchased from Selleckchem; tetracosactide•OAc was purchased from Alpha-Diagnostics. Met-Gly, Aprotinin (from bovine lung, 3–7 TIU/mg, received containing carrying amounts of methionine sulfoxide), Ubiquitin (from bovine erythrocytes, BioUltra grade), Thioredoxin (from *E. coli*, recombinant, >3 units/mg), and  $\alpha$ -

Lactalbumin (type III, >85%) were purchased from Sigma-Aldrich. All peptides and proteins were used without any additional purification. Azide **17**, was purchased from Sigma-Aldrich and used as received. All other reagents were acquired from commercial sources and used as received. Protein modification reactions were monitored and outcomes assessed using either a Shimadzu LCMS-2020 (solvents: A: 0.05% Formic acid in H<sub>2</sub>O B: 0.05% formic acid in 95:5 CH<sub>3</sub>CN:H<sub>2</sub>O) equipped with an APCI probe, or a Waters XEVO GII-S Q-TOF equipped with an ESI probe (solvent system: A: 0.1% formic acid in H<sub>2</sub>O, B: 0.1% formic acid in 95:5 CH<sub>3</sub>CN:H<sub>2</sub>O). Conversions and product ratios were estimated either using total ion count (TIC, Shimadzu LCMS-2020), or MaxEnt software<sup>7</sup> (Waters XEVO). Note: Due to the formation of cationic sulfur, the MaxEnt software underestimates the mass of the parent protein+label peak by 1 hydrogen.

For MSMS analysis, frozen peptide stocks were thawed on ice followed by gentle vortexing. Each peptide was diluted to a final concentration of 1 μM in 50% v/v acetonitrile, 0.1% v/v acetic acid for mass spectrometry analysis.

Peptide ions were generated by electrospray ionisation (ESI) using a TriVersa NanoMate (Advion BioSciences, Inc., Ithaca, NY) from a 10 μl injection with an applied spray voltage of 1.55kV and a gas pressure of 0.7psi. Ions generated by ESI were introduced directly into an Orbitrap Fusion tribrid mass spectrometer (Thermo Fisher Scientific, San Jose, CA). An accurate mass full scan from 100-2000 *m/z* was performed at a resolution of 120,000 (full width at half-maximum, FWHM) with data acquisition for 1 minute using the mass spectrometer instrument control software, Orbitrap Tune Application 2.0. Peptide species charge states in the collected raw spectra were determined by manual interpretation using the theoretical monoisotopic mass. The most intense observed charge state for each peptide was selected for higher energy collisional dissociation (HCD) and electron transfer dissociation (ETD) fragmentation.

Precursor ion isolation was performed in the mass selecting quadrupole with an isolation window of 2 *m/z*. The precursor automatic gain control (AGC) target value was 1.5e5 with a maximum injection time of 200msec. The normalised collision energy (NCE) for HCD fragmentation was optimised to 30%. ETD ion reaction time was set to 100msec with an anion AGC of 2.5e5 and a maximum injection time of 200msec. Supplemental collisional activation (SA) in EThcD was optimised to 25%. Spectra for both fragmentation methods were acquired over a mass range of 100-4000 *m/z*. Each accurate mass full scan and subsequent MS2 fragmentation strategy was analysed in duplicate.

Peptide MS2 spectra from HCD and ETD fragmentation approaches were loaded into mMass 5.5 (<http://www.mmass.org>) for processing and deconvolution [1]. Observed peptide fragments were matched to theoretical fragment predictions for each peptide allowing a maximum charge state of 5 and a match tolerance of 20ppm. The Lorikeet spectrum viewer (<http://code.google.com/p/lorikeet/>) was used to view combined ETD and HCD MS2 spectra annotated with y, b, c and z fragment ions. Fragmentation data were further validated by manual inspection of the spectra.

## References

- [1] Strohmalm M, Hassman M, Košata B, Kodíček M (2008) mMass Data Miner: an Open Source Alternative for Mass Spectrometric Data Analysis.

Rapid Commun Mass Spec 22 (6), 905-908  
DOI: 10.1002/rcm.3444

### **Affiliations**

Professor Jason Chin, Dr Nicolas Huguenin and Dr Mark Skehel MRC Laboratory of Molecular Biology, Cambridge, UK

Dr Hilary J. Lewis, Bioscience, Oncology, IMED Biotech Unit, AstraZeneca, Cambridge, UK

Dr Matthew J. Edgeworth, Analytical Sciences, MedImmune, Cambridge, UK

## General Synthetic Procedures.

### Synthesis of Iodonium Salts 1.

#### General Procedure A: Synthesis of substituted $\alpha$ -bromo esters.

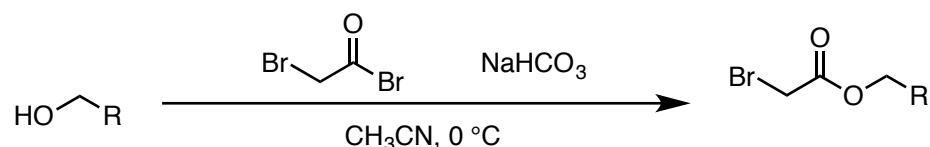

The synthesis of substituted  $\alpha$ -bromoesters was achieved by adapting the procedure of Fukuyama<sup>3</sup> as follows: A round-bottomed flask equipped with a magnetic stirrer and side-armed inlet adaptor was charged with sodium bicarbonate (5 eq.) and then evacuated and refilled with  $\text{N}_2$ . To the flask was added the desired alcohol (1 eq) and acetonitrile (0.15M in alcohol), and the resulting mixture chilled in an ice bath. To the stirring solution was added bromoacetyl bromide (1.5 eq), and the resulting mixture allowed to stir for 1-1.5 hours. The reaction mixture is quenched with  $\text{NaHCO}_3$  (aq) and diluted with either diethyl ether or methylene chloride. The mixture is transferred to a separatory funnel and the layers separated. The organic layer was washed twice with  $\text{NaHCO}_3$  (aq) and once with brine, dried over magnesium sulfate, filtered, and the solvent removed using a rotary evaporator to yield the desired  $\alpha$ -bromoester.

#### General Procedure B: Synthesis of substituted $\alpha$ -diazo esters from $\alpha$ -bromoesters

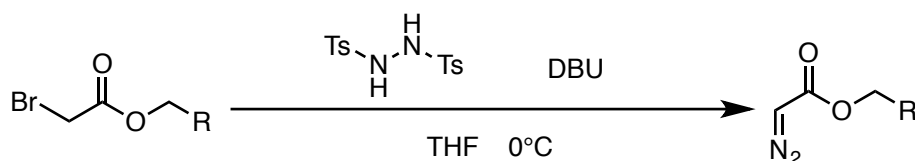

The synthesis of substituted  $\alpha$ -diazoesters was achieved by adapting the procedure of Fukuyama<sup>3</sup> as follows: A round-bottomed flask equipped with a magnetic stirrer and side-armed inlet adaptor was charged with  $N,N'$ -ditosylhydrazine (1.5 eq.) and then evacuated and refilled with  $\text{N}_2$ . To the flask was added the desired  $\alpha$ -bromoester (1 eq) and tetrahydrofuran (0.2M in  $\alpha$ -bromoester), and resulting mixture chilled in an ice bath. To the stirring solution was added 1,8-diaza-[4.4.0]-bicyclo-undec-7-ene (3 eq) in a rapid dropwise fashion, and the resulting mixture allowed to stir for 1 hour. The reaction mixture is quenched with  $\text{NaHCO}_3$  (aq) and diluted with either diethyl ether or methylene chloride. The mixture is transferred to a separatory funnel and the layers separated. The aqueous layer is extracted with either diethyl ether or methylene chloride. The combined organic layers were washed with brine, dried over magnesium sulfate, filtered, and concentrated onto silica gel using a rotary evaporator. Purification by column chromatography furnished the desired  $\alpha$ -diazoester.

#### General Procedure C: Synthesis of iodonium salts from $\alpha$ -diazoesters.

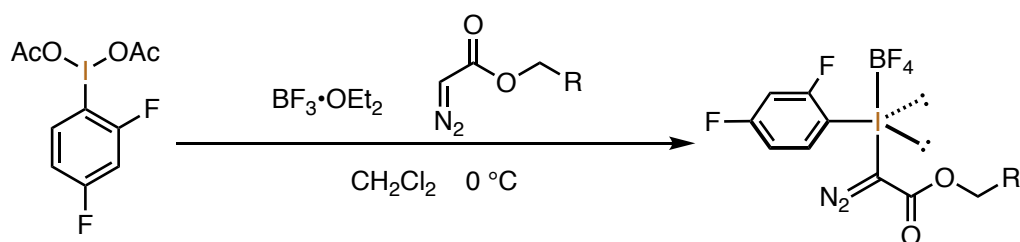

A round-bottomed flask equipped with a magnetic stirrer and a sidearm inlet adaptor is heat-dried under vacuum. The flask was charged with freshly recrystallized (2,4-difluorophenyl)- $\lambda^3$ -iodanediyl diacetate (1 eq.) and is evacuated and refilled with  $N_2$ . To the flask was added methylene chloride (0.15M) via syringe, and the flask stirred vigorously and chilled in an ice bath. To the stirring solution was added  $BF_3 \cdot OEt_2$  (1.1–1.3 eq) and the resulting solution was stirred for 5 minutes. To the flask was added the desired  $\alpha$ -diazo carbonyl (1.1–1.3 eq) at a rapid dropwise rate, and the resulting solution stirred for 30 minutes at 0 °C. The solvent is then removed using a rotary evaporator. The resulting orange/red residue is triturated using a sonicator with mixtures of methylene chloride, diethyl ether, and 40-60 petroleum ether to yield the desired iodonium salt.

**Safety Notice:** Whilst we have prepared the following iodonium salts without incidence (nor have any issues been reported in previous literature), we have not prepared these reagents on a scale larger than 3 millimoles (ca. 1 gram), nor have we performed relevant calorimetry tests. Given the inherent chemical energy of these iodonium salts, we strongly recommend that users follow the appropriate safety procedures commensurate with preparing high-energy reagents.

**(1-diazo-2-ethoxy-2-oxoethyl)(2,4-difluorophenyl)iodonium tetrafluoroborate (1b)**

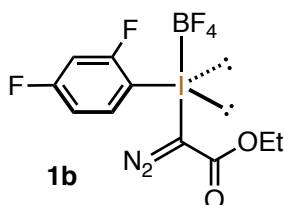

**1b** was prepared according to General Procedure C using (2,4-difluorophenyl)- $\lambda^3$ -iodanediyl diacetate (0.94 g, 2.6 mmol), boron trifluoride diethyl etherate (0.42 mL, 3.0 mmol), and ethyl diazoacetate (0.41 mL, 87% purity, 3.0 mmol), with a reaction time of 30 minutes. Trituration using a sonicator (5:20:75  $CH_2Cl_2$ :40-60 petroleum ether:diethyl ether, 20 mL) afforded **1b** (1.00 g, 87% yield) as a yellow, free flowing, powder. Crystals suitable for X-ray diffraction were grown *via* slow diffusion of 40-60 petroleum ether into an ethyl acetate solution of **1b**. **1b** shows good stability (>3 months) when stored in a -20 °C freezer. **1b** displays the following stability profile in  $D_2O$ : 24hrs: 90% remaining, 48hrs: 69% remaining.

**MP:** 74 °C (decomp)

**$^1H$ -NMR** (500 MHz,  $CD_3CN$ )  $\delta$ : 8.23 (app dt,  $J = 6.4, 9.0$  Hz, 1H), 7.40 (app td,  $J = 2.7, 8.8$  Hz, 1H), 7.25 (app td,  $J = 2.5, 8.6$  Hz, 1H), 4.31 (q,  $J = 7.1$  Hz, 2H), 1.28 (t,  $J = 7.1$  Hz, 3H).

<sup>13</sup>C-NMR (125 MHz, CDCl<sub>3</sub>) δ: 166.9 (dd, *J* = 12.2, 258 Hz), 161.3 (dd, *J* = 14 Hz, 254 Hz), 160.4, 139.0 (d, *J* = 11 Hz), 115.4, (app dd, *J* = 2.8, 23 Hz), 106.2 (app t, *J* = 27 Hz, 1C), 96.5 (app d, *J* = 23 Hz), 64.3, 41.3 (s, br), 13.3.

<sup>19</sup>F-NMR (376 MHz, CD<sub>3</sub>CN) δ: -92.9 (d, *J* = 12 Hz), -100.0 (app d, *J* = 12 Hz), -151.3– -151.6 (m, br).

IR: 3086, 3065, 3037, 2988, 1698, 1682, 1598, 1587, 1474, 1426, 1371, 1270, 1192, 1155, 1117, 1056, 1041, 1001, 963, 876, 851, 822, 760, 732, 616.

HRMS-(ESI)<sup>+</sup> (m/z) Found (M-BF<sub>4</sub>): 352.9604, Calc'd C<sub>10</sub>H<sub>8</sub>O<sub>2</sub>N<sub>2</sub>F<sub>2</sub>I requires 352.9593.

### tetradecyl 2-bromoacetate (**S-1**)

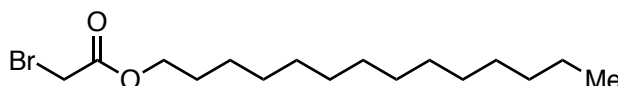

**S-1**

**S-1** was prepared according to General Procedure A using myristyl alcohol (6.50 g, 30 mmol), bromoacetyl bromide (7.8 mL, 90 mmol), sodium bicarbonate (12.9 g, 154 mmol) and methylene chloride (200 mL), with a reaction time of 2 hours. Methylene chloride was used in the workup. **S-1** was isolated (9.83 g, 97% yield) as a colorless oil that was of sufficient purity to be used directly in subsequent transformations. The structural characteristics of **S-1** are in agreement with previously reported values<sup>9</sup>.

<sup>1</sup>H-NMR (500 MHz, CDCl<sub>3</sub>) δ: 4.17 (t, *J* = 7.6 Hz, 2H), 3.83 (s, 2H), 1.70-1.63 (app quint, *J* = 6.8 Hz, 2H), 1.39-1.19 (m, 22H), 0.88 (t, *J* = 6.9 Hz, 3H)

<sup>13</sup>C-NMR (125 MHz, CDCl<sub>3</sub>) δ: 167.3, 66.5, 31.9, 29.7 (br, 5C), 29.6, 29.5, 29.4, 29.2, 28.4, 26.0, 25.6, 22.7.

IR: 2921, 2855, 1735, 1647, 1607, 1534, 1493, 1190, 1147, 1106, 888.

HRMS-(ESI)<sup>+</sup> (m/z) Found (M+H): 335.1513, Calc'd C<sub>16</sub>H<sub>32</sub>BrO<sub>2</sub> requires 335.1586.

### tetradecyl 2-diazoacetate (**S-2**)

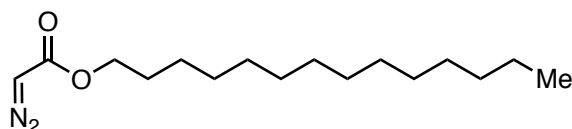

**S-2**

**S-2** was prepared according to General Procedure B using **S-1** (1.68 g, 5.0 mmol), *N,N'*-ditosylhydrazine (2.58 g, 7.6 mmol), and 1,8-diazo-bicyclo-[5.4.0]-undec-7-ene (3.0 mL, 20 mmol), with a reaction time of 1 hour. Diethyl ether was used in the workup. Column chromatography (5% diethyl ether/40-60 petroleum ether) afforded **S-2** (0.976 g, 69%) as a yellow waxy solid that melts at room temperature.

R<sub>f</sub>: 0.4 (20% Et<sub>2</sub>O:40-60 petrol)

<sup>1</sup>H-NMR (500 MHz, CDCl<sub>3</sub>) δ: 4.72 (br, s), 4.15 (t, *J* = 6.7 Hz, 2H), 1.66-1.60 (m, 2H), 1.40-1.18 (m, 23H), 0.88 (t, *J* = 6.7 Hz, 3H).

<sup>13</sup>C-NMR (125 MHz, CDCl<sub>3</sub>) δ: 167.1, 65.1, 46.1 (br), 31.9, 29.7 (br, 5C), 29.6, 29.5, 29.4, 28.8, 25.8, 22.7, 14.1.

IR: 2922, 2853, 2107, 1694, 1466, 1396, 1354, 1238, 1181, 1031 (br), 739, 721.

HRMS-(ESI)<sup>+</sup> (m/z) Found (M+H): 283.2362, Calc'd C<sub>16</sub>H<sub>31</sub>O<sub>2</sub>N<sub>2</sub> requires 283.2386.



**(1-diazo-2-oxo-2-(tetradecyloxy)ethyl)(2,4-difluorophenyl)iodonium tetrafluoroborate. (1c)**

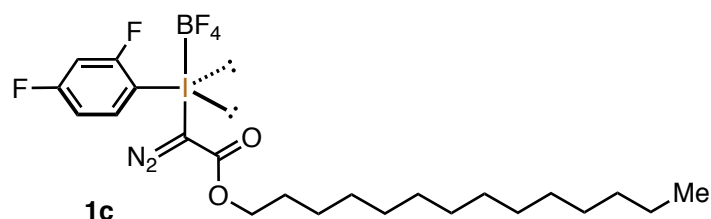

**1c** was prepared according to General Procedure C using (2,4-difluorophenyl)- $\lambda^3$ -iodanediyl diacetate (0.36 g, 1.0 mmol), boron trifluoride diethyl etherate (0.16 mL, 1.3 mmol), and **S-2** (0.37 g, 1.3 mmol), with a reaction time of 30 minutes. To the reaction solution was added water and  $\text{CH}_2\text{Cl}_2$ , and the layers were separated. The aqueous layer was extracted with  $\text{CH}_2\text{Cl}_2$ , and the combined organic layers were carefully filtered over cotton and the solvent removed using a rotary evaporator. The resulting orange oil was dissolved in 40-60 petroleum ether (18 mL), and the solution was chilled in an acetone bath that was maintained between  $-30$  to  $-40$  °C, resulting in the formation of a yellow oil. After the oil had settled, the 40-60 petroleum ether was carefully decanted. The resulting mixture was warmed to room temperature and 40-60 petroleum ether (10 mL) was added, and the chilling process was repeated twice. The resulting yellow mixture was allowed to warm to room temperature, and any excess petroleum ether was removed using a rotary evaporator, yielding **1c** as an orange oil of 90% purity (0.29 g, 45%). While the carbon possessing the diazo moiety was not observable by  $^{13}\text{C}$ -NMR, the IR stretch<sup>8</sup> at  $2105\text{ cm}^{-1}$  as well as the correct mass being observed confirms the presence of the diazo group.

**$^1\text{H}$ -NMR** (500 MHz,  $\text{CD}_3\text{CN}$ )  $\delta$ : 8.18 (ddd,  $J = 5.8, 6.8, 9.0$  Hz, 1H), 7.34 (app td,  $J = 2.8, 8.8$  Hz, 1H), 7.22-7.15 (m, 1H), 4.21 (t,  $J = 6.5$  Hz, 2H), 1.68-1.57 (m, 2H), 1.37-1.22 (m, br, 22 H), 0.91 (t,  $J = 6.9$  Hz, 3H).

**$^{13}\text{C}$ -NMR** (125 MHz,  $\text{CDCl}_3$ )  $\delta$ : 166.3 (app d,  $J = 248$  Hz), 161.7, 160.7 (app d,  $J = 252$  Hz), 138.1, 115.0 (app d,  $J = 22$  Hz), 105.9 (app t,  $J = 29$  Hz), 67.6, 42.2 (br), 31.7, 29.4 (4C), 29.3, 29.2, 29.1, 28.9, 25.4, 22.4.

**$^{19}\text{F}$ -NMR** (375 MHz,  $\text{CD}_3\text{CN}$ )  $\delta$ :  $-93.9$  (d,  $J = 12$  Hz),  $-101.7$  (d,  $J = 12$  Hz),  $-151.7$ – $-151.9$  (m, br).

**IR**: 3097, 2922, 2853, 2105, 1699, 1587, 1525, 1467, 1423, 1390, 1271, 1187, 1033, 965, 850, 732.

**HRMS**-(ESI)<sup>+</sup> (m/z) Found (M– $\text{BF}_4$ ): 521.1487, Calc'd  $\text{C}_{22}\text{H}_{32}\text{O}_2\text{N}_2\text{F}_2\text{I}$  requires 521.1471.

**(1S,4S)-bicyclo[2.2.1]hept-5-en-2-yl)methyl 2-bromoacetate (S-3)**

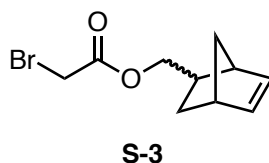

**S-3** was prepared according to General Procedure A using norbornenol (1.245 g, 10 mmol, 1.7:1 mixture of *endo*- and *exo*-isomers), bromoacetyl bromide (2.6 mL, 30

mmol), and sodium bicarbonate (4.2 g, 50 mmol), with a reaction time of 1.5 hours. Diethyl ether was used in the workup. **S-3** was isolated (2.175 g, 88% yield) as a faint brown oil that was of sufficient purity (95%) to be used directly in subsequent transformations.

**Peaks attributable to exo-S-3:**

<sup>1</sup>H-NMR (400 MHz, CDCl<sub>3</sub>) δ: 6.14-6.09 (m, 2H), 4.27 (dd, *J* = 11.0, 6.5 Hz, 1H), 4.10 (dd, *J* = 11.4, 9.2 Hz, 1H), 3.88 (s, 2H), 2.88 (app s, 1H), 2.75 (app s, 1H), 1.83 (m, 1H), 1.42-1.37 (m, 1H), 1.36-1.25 (m, 3H), 1.19 (ddd, *J* = 11.8, 4.5, 3.5, 1H).

**Peaks attributable to endo-S-3:**

<sup>1</sup>H-NMR (400 MHz, CDCl<sub>3</sub>) δ: 6.19 (dd, *J* = 5.8, 3.0 Hz, 1H), 5.97 (dd, *J* = 5.8, 2.9 Hz, 1H), 3.98 (dd, *J* = 10.8, 6.6 Hz, 1H), 3.85 (s, 2H), 3.79 (dd, *J* = 11, 9.6 Hz, 1H), 2.93 (app s, 1H), 2.75 (app s, 1H), 2.50-2.40 (m, 1H), 1.88 (ddd, *J* = 12, 8.7, 3.8 Hz, 1H), 1.49 (ddd, *J* = 8.4, 4.8, 2.0 Hz, 1H), 1.31-1.26 (m, 1H), 0.59 (ddd, *J* = 11.7, 4.5, 2.5 Hz, 1H).

<sup>13</sup>C-NMR (100 MHz, CDCl<sub>3</sub>): 167.3, 167.2, 137.8, 137.0, 136.1, 132.1, 70.3, 69.7, 49.4, 44.9, 43.8, 43.6, 42.2, 41.6, 37.8, 37.6, 29.5, 28.9, 26.0 (2C).

IR: 2973, 2869, 1732, 1451, 1325, 1274, 1166, 1106, 987, 720.

HRMS-(ESI)<sup>+</sup> (m/z) Found (M+H): 245.0171, Calc'd C<sub>10</sub>H<sub>13</sub>O<sub>2</sub>N<sub>2</sub> requires 245.0177.

**((1*S*,4*S*)-bicyclo[2.2.1]hept-5-en-2-yl)methyl 2-diazoacetate. (S-4)**

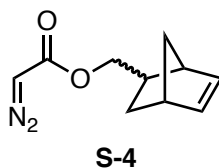

**S-4** was prepared according to General Procedure B using **S-3** (2.45 g, 10 mmol), *N,N'*-ditosylhydrazine (5.11 g, 16 mmol), and 1,8-diazo-bicyclo-[5.4.0]-undec-7-ene (6.0 mL, 40 mmol), with a reaction time of 1 hour. Diethyl ether was used in the workup. Column chromatography (10% diethyl ether/40-60 petroleum ether) afforded **S-4** (1.39 g, 72%) as a yellow oil. **S-6** displays moderate stability in a -20 °C freezer, and should thus be used promptly after preparation.

R<sub>f</sub>: 0.5 (20% ethyl acetate/40-60 petroleum ether)

**<sup>1</sup>H-NMR Peaks attributable to exo:**

<sup>1</sup>H-NMR (400 MHz, CD<sub>3</sub>CN) δ: 6.13-6.08 (m, 2H), 4.96 (s, br, 1H), 4.20 (dd, *J* = 11.0, 6.5 Hz, 1H), 4.05 (dd, *J* = 11.3, 9.1 Hz, 1H), 2.83 (app s, 1H), 2.69 (app s, 1H), 1.72-1.65 (m, 1H), 1.38-1.34 (m, 1H), 1.32-1.18 (m, 3H).

**<sup>1</sup>H-NMR peaks attributable to endo:**

<sup>1</sup>H-NMR (400 MHz, CD<sub>3</sub>CN) δ: 6.17 (dd, *J* = 5.8, 3.0 Hz, 1H), 5.95 (dd, *J* = 5.8, 2.9 Hz, 1H), 4.74 (s, br, 1H), 3.96 (dd, *J* = 10.8, 6.6 Hz, 1H), 3.75 (app t, *J* = 10 Hz, 1H), 2.88 (app s, 1H), 2.83 (app s, 1H), 2.46-2.35 (m, 1H), 1.85 (ddd, *J* = 11.9, 8.5, 3.8 Hz, 1H), 1.40 (ddd, *J* = 8.2, 4.9, 2.0 Hz, 1H), 1.30-1.27 (m, 1H), 0.56 (ddd, *J* = 11.9, 4.6, 2.5 Hz, 1H).

<sup>13</sup>C-NMR (125 MHz, CD<sub>3</sub>CN) δ: 166.7 (br), 137.5, 136.9, 136.2, 132.1, 68.3, 67.7, 49.0, 45.9 (br), 44.6, 43.7, 42.1, 41.5, 38.2, 37.9, 29.0, 28.5.

IR: 3118, 2968, 2869, 2104, 1686, 1448, 1393, 1360, 1336, 1237, 1179, 1025, 990, 739, 720.

HRMS-(ESI)<sup>+</sup> (m/z) Found (M+H): 193.0965, Calc'd C<sub>10</sub>H<sub>13</sub>O<sub>2</sub>N<sub>2</sub> requires 193.0972.

**(2-(((1*R*,4*R*)-bicyclo[2.2.1]hept-5-en-2-yl)methoxy)-1-diazo-2-oxoethyl)(2,4-difluorophenyl)iodonium tetrafluoroborate.(1d) mixture of endo- and exo-isomers**

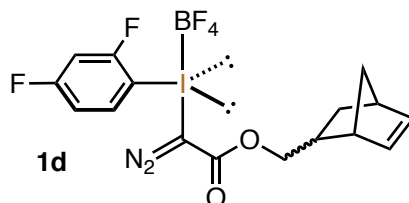

**1d** was prepared according to General Procedure C using (2,4-difluorophenyl)- $\lambda^3$ -iodanediyl diacetate (0.420 g, 1.2 mmol), boron trifluoride diethyl etherate (0.16 mL, 1.3 mmol), and **S-4** (0.248 g, 1.3 mmol), with a reaction time of 30 minutes. Trituration using a sonicator (1:1 40-60 petroleum ether:diethyl ether, 30 mL, 10 mL (x 2), 40-60 petroleum ether, 10 mL, 20 mL, 30 mL) afforded **1d** (0.326 g, 54% yield) as an orange, sticky solid. While the carbon possessing the diazo moiety was not observable by <sup>13</sup>C-NMR, the IR stretch<sup>8</sup> at 2114 cm<sup>-1</sup> as well as the correct mass being observed confirms the presence of the diazo group.

<sup>1</sup>H-NMR (500 MHz, CD<sub>3</sub>CN)  $\delta$ : 8.17 (app ddd,  $J$  = 5.8, 6.6, 9.1 Hz, 1H), 7.38-7.31 (m, 1H), 7.23-7.17 (m, 1H), 6.21 (dd,  $J$  = 3.1, 5.7 Hz, 0.6 H), 6.16-6.09 (m, 0.6H), 5.93 (dd,  $J$  = 2.8, 6.0 Hz, 0.6H), 4.22 (ab q,  $J$  = 10.8, 68.9 Hz, 0.3H), 4.22 (ab q  $J$  = 10.8, 53 Hz, 0.3 H), 3.90 (ab q,  $J$  = 10.6, 91.3 Hz, 0.5H), 3.90 (ab q,  $J$  = 10.6, 74.2, 0.5 H) 2.85-2.78 (m, br, 3H), 2.64 (s, br, 0.6H), 2.44-2.37 (m, 1H), 1.87-1.80 (ddd,  $J$  = 3.9, 9.6, 11.7 Hz, 1H), 1.73-1.66 (m, 0.5 H), 1.43-1.37 (m, 1H), 1.33-1.15 (m, 3H), 0.54 (ddd,  $J$  = 2.6, 4.6, 11.7 Hz, 1H).

<sup>13</sup>C-NMR (125 MHz, CD<sub>3</sub>CN)  $\delta$ : 166.7 (dd,  $J$  = 11, 256 Hz), 161.1 (dd, 15, 156 Hz), 161.0, 160.8, 138.6 (d,  $J$  = 10 Hz), 137.8, 137.1, 136.0, 131.9, 115.3 (d,  $J$  = 24 Hz), 106.2 (app t,  $J$  = 26 Hz), 98.2 (br), 71.6, 71.0, 49.0, 44.5, 43.7, 43.4, 42.1, 41.5, 38.0, 37.6, 28.9, 28.3.

<sup>19</sup>F-NMR (376 MHz, CD<sub>3</sub>CN)  $\delta$ : -93.7 (d,  $J$  = 12 Hz), -100.6 (d,  $J$  = 12 Hz), -151.8 (s), -151.9 (s).

IR: 3099, 2971, 2871, 2114, 1699, 1587, 1473, 1426, 1270, 1031 (br), 964, 850, 728.

HRMS-(ESI)<sup>+</sup> (m/z) Found (M-BF<sub>4</sub>): 431.0045, Calc'd C<sub>16</sub>H<sub>14</sub>O<sub>2</sub>N<sub>2</sub>F<sub>2</sub>I requires 431.0063.

**(1-diazo-2-oxo-2-phenylethyl)(2,4-difluorophenyl)iodonium tetrafluoroborate. (1e)**

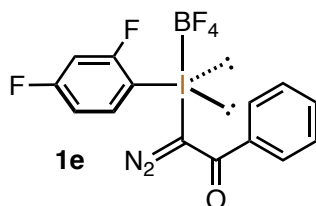

**1e** was prepared according to General Procedure C using (2,4-difluorophenyl)- $\lambda^3$ -iodanediyl diacetate (0.244 g, 0.68 mmol), boron trifluoride diethyl etherate (0.10 mL, 0.82 mmol), and  $\alpha$ -diazobenzophenone<sup>3</sup> (0.121 g, 0.82 mmol), with a reaction time of 30 minutes. The reaction solution was then transferred to a flask containing a solution of 1:1 40-60 petroleum ether:diethyl ether (30 mL), and the resulting mixture was triturated using a sonicator, affording **1e** (0.263 g, 82%) as an orange, sticky semi-solid. **1e** should be stored in a  $-20$  °C freezer and used within 1 month of preparation.

**<sup>1</sup>H-NMR** (500 MHz, CD<sub>3</sub>CN)  $\delta$ : 8.28 (app ddd,  $J = 5.8, 6.9, 9.1$  Hz, 1H), 7.69-7.63 (m, 3H), 7.57-7.53 (m, 2H), 7.38 (app td,  $J = 2.8, 8.9$  Hz, 1H), 7.26-7.21 (m, 1H).

**<sup>13</sup>C-NMR** (125 MHz, CD<sub>3</sub>CN)  $\delta$ : 182.1, 167.0 (dd,  $J = 12, 256$  Hz), 161.7 (dd,  $J = 14, 256$  Hz), 139.6 (d,  $J = 11$  Hz), 133.7, 132.6, 129.3, 127.9, 115.5 (app d,  $J = 23$  Hz), 106.3 (app t,  $J = 27$  Hz), 95.4 (dd,  $J = 4, 24$  Hz), 58.9.

**<sup>19</sup>F-NMR** (376 MHz, CD<sub>3</sub>CN)  $\delta$ :  $-92.3$  (d,  $J = 12$  Hz),  $-100.0$  ( $J = 12$  Hz),  $-151.6$ — $151.9$  (m, br).

**IR**: 3099, 2971, 2871, 2114, 1699, 1587, 1473, 1426, 1270, 1031 (br), 964, 850, 728.

**HRMS**-(ESI)<sup>+</sup> (m/z) Found (M-BF<sub>4</sub>): 384.9633, Calc'd C<sub>14</sub>H<sub>8</sub>ON<sub>2</sub>F<sub>2</sub>I requires 384.9633.

**5(6)-((6-(2-bromoacetoxy)hexyl)carbamoyl)-3-oxo-3*H*-spiro[isobenzofuran-1,9'-xanthene]-3',6'-diyl diacetate (**S-5B**)**

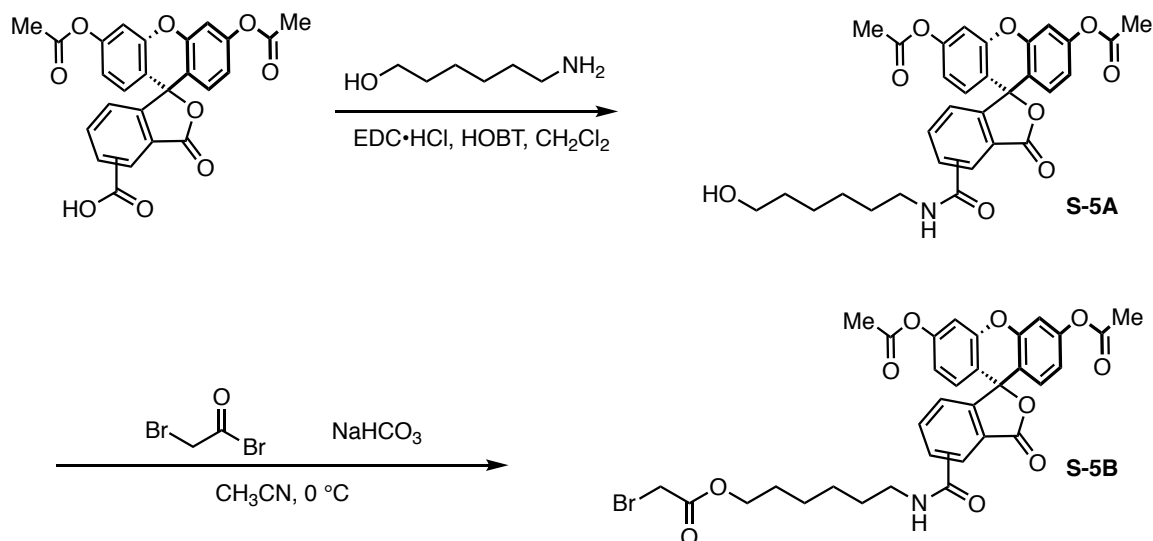

A round-bottomed flask equipped with a magnetic stirrer and a sidearm inlet adaptor is charged with 5(6)-carboxyfluorescein diacetate<sup>4</sup> (1.49 g, 3.2 mmol, 1:1 mixtures of regioisomers) and *N*-hydroxybenzotriazole (379 mg, 3.2 mmol) and is evacuated and refilled with N<sub>2</sub>. To the flask was added methylene chloride (5 mL) and the resulting solution was stirred rapidly and chilled in an ice bath. To the flask was added *N*-ethyl-*N*'-dimethylaminopropyl carbodiimide (680 mg, 3.6 mmol) in a single portion, and the resulting mixture was stirred rapidly. After 7 minutes, the ice bath was removed, and the mixture stirred for a further 7 minutes. To the flask was added 6-amino-1-hexanol (529 mg, 3.9 mmol) in methylene chloride (6 mL) and the resulting mixture was stirred at room temperature for 4 hours. The reaction was quenched with NH<sub>4</sub>Cl(aq), and the biphasic solution was transferred to a separatory funnel where the layers were separated. The aqueous layer was extracted once with methylene chloride. The combined organic layers were washed with 1M HCl(aq), NaHCO<sub>3</sub> (aq), and brine, then dried over MgSO<sub>4</sub>, filtered and the solvent was removed using a rotary evaporator to yield crude **S-5A**.

The flask that contained crude **S-5A** was equipped with a magnetic stirrer and a sidearm inlet adaptor, was charged with NaHCO<sub>3</sub>, and evacuated and refilled with N<sub>2</sub>. To the flask was added acetonitrile (16 mL), and the mixture was stirred and chilled in an ice bath. To the stirring solution was added bromoacetyl bromide (0.85 mL, 9.7 mmol) in a rapid dropwise fashion, and the resulting solution stirred rapidly for 1 hour. The mixture was quenched with NaHCO<sub>3</sub>(aq), diluted with methylene chloride, and the layers were separated in a separatory funnel. The aqueous layer is extracted with methylene chloride. The combined organic layers are then washed with NaHCO<sub>3</sub> (aq) and brine, dried with MgSO<sub>4</sub>, filtered, and concentrated onto silica gel using a rotary evaporator. Column chromatography (20-40% ethyl acetate/ 40-60 petroleum ether) afforded a 1:1 regioisomeric mixture of **S-5B** (1.03 g, 47%) as a white semi-solid.

**R<sub>f</sub>**: 0.2 (50% ethyl acetate:40-60 petroleum ether)

**<sup>1</sup>H-NMR** (400 MHz, CDCl<sub>3</sub>): 8.36 (app d, *J* = 1.0 Hz, 1H), 8.19 (dd, *J* = 8.2, 1.5 Hz, 1 H), 7.48-7.46 (m, 0.7H), 7.29 (app d, *J* = 8.2 Hz, 1 H), 7.12 (app d, *J* = 2.0 Hz, 2H), 7.09-7.06 (m, 1.3H), 6.85-6.78 (m, 7H), 6.45 (app t, *J* = 5.6 Hz, 1H), 6.34 (app t, *J* =

5.6 Hz, 0.7H), 4.19 (t,  $J = 6.5$  Hz, 2H), 4.15 (t,  $J = 6.5$  Hz, 1.5H), 3.85 (s, 2H), 3.80 (s, 1.4H), 3.54-3.46 (m, 2H), 3.43-3.36 (m, 1.5H), 2.35-2.30 (m, 10H), 1.74-1.63 (m, 3H), 1.49-1.41 (m, 3H), 1.41-1.34 (m, 2H).

$^{13}\text{C-NMR}$  (100 MHz,  $\text{CDCl}_3$ ): 169.0, 168.9, 168.4, 168.2, 167.4 (2C), 165.6 (2C), 155.1, 153.3, 152.3, 152.2, 151.6, 151.4, 141.6, 137.1, 134.8, 129.6, 129.1, 128.8, 128.2, 126.6, 125.7, 124.7, 123.1, 122.1, 118.0, 117.9, 115.8, 115.7, 110.6 (2C), 82.1, 81.7, 66.1, 66.0, 40.2 (2C), 29.4, 29.3, 28.3 (2C), 26.4, 26.3, 25.9 (2C), 25.4, 25.3, 21.1.

**IR:** 3072, 2934, 2856, 1757 (br), 1643, 1608, 1546, 1493, 1419, 1368, 1277, 1241, 1193, 1150, 1107, 1012, 993, 890.

**HRMS-(ESI)<sup>+</sup>** (m/z) Found (M+H): 680.1111, Calc'd  $\text{C}_{33}\text{H}_{31}\text{O}_{10}\text{NBr}$  requires 680.1126.

**5(6)-((6-(2-diazoacetoxy)hexyl)carbamoyl)-3-oxo-3H-spiro[isobenzofuran-1,9'-xanthene]-3',6'-diyl diacetate (S-6)**

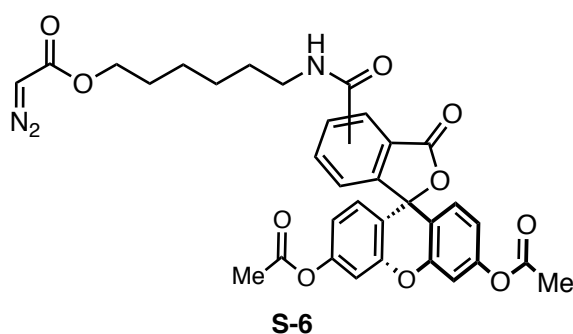

**S-7** was prepared according to General Procedure B using **S-5B** (0.301 g, 0.4 mmol), *N,N'*-ditosylhydrazine (0.230 g, 0.7 mmol), 1,8-diazo-bicyclo-[5.4.0]-undec-7-ene (0.27 mL, 1.8 mmol), and a reaction time of 1 hour, after which acetic anhydride was added (0.2 mL). Dichloromethane was used in the workup. Column chromatography (30-50% ethyl acetate/40-60 petroleum ether) afforded **S-6** as an impure solid. The solid was triturated with ether, filtered, and the solvent removed using a rotary evaporator to afford **S-7** (0.111 g, 40% yield) as a yellow/green semi-solid.

**R<sub>f</sub>:** 0.01 (50% ethyl acetate/40-60 petroleum ether)

$^1\text{H-NMR}$  (400 MHz,  $\text{CD}_3\text{CN}$ )  $\delta$ : 8.41 (app s, 0.9H), 8.20 (dd,  $J = 8.1, 1.5$  Hz, 1H), 8.13-8.08 (m, 1.4H), 7.63 (app s, 0.7H), 7.37 (app d,  $J = 8.1$  Hz, 1H), 7.32 (app t,  $J = 5.5$  Hz, 1H), 7.19-7.12 (m, 3.9H), 6.97-6.87 (m, 7H), 5.00-4.89 (m, br, 1.25H), 4.15 (t,  $J = 6.5$  Hz, 2H), 4.09 (t,  $J = 6.5$  Hz, 1.4H), 3.44-3.38 (m, 2H), 3.32-3.25 (m, 1.4H), 2.29 (s, 10H), 2.18 (s, 6.9H), 1.72-1.48 (m, 6H), 1.47-1.39 (m, 3H), 1.31 (m, 2.7H).

$^{13}\text{C-NMR}$  (100 MHz,  $\text{CD}_3\text{CN}$ )  $\delta$ : 170.0 (2C), 169.1, 169.0, 166.1, 166.0, 155.6, 153.8, 153.5 (2C), 152.3, 142.9, 138.3, 135.6, 130.3, 130.2, 130.1, 128.8, 127.3, 126.1, 125.0, 124.5, 123.4, 119.3 (2C), 117.0 (2C), 111.4 (2C), 82.4, 65.4, 65.3, 46.7 (br), 40.5, 40.4, 29.9, 29.7, 29.4, 29.3, 27.2, 27.1, 26.1 (2C), 21.2.

**IR:** 3371, 3113, 2934, 2859, 2109, 1759, 1688, 1645, 1608, 1493, 1420, 1365, 1191, 1150, 1108, 1012, 993, 890.

**HRMS-(ESI)<sup>+</sup>** (m/z) Found (M+H): 628.1910, Calc'd  $\text{C}_{33}\text{H}_{30}\text{O}_{10}\text{N}_3$  requires 628.1926.

**5(6)-(((6-(2-diazo-2-((2,4-difluorophenyl)(tetrafluoro- $\lambda^5$ -boraneyl)- $\lambda^3$ -iodaneyl)acetoxy)hexyl)carbamoyl)-3-oxo-3H-spiro[isobenzofuran-1,9'-xanthene]-3',6'-diyl diacetate. (1f) mixture of regioisomers**

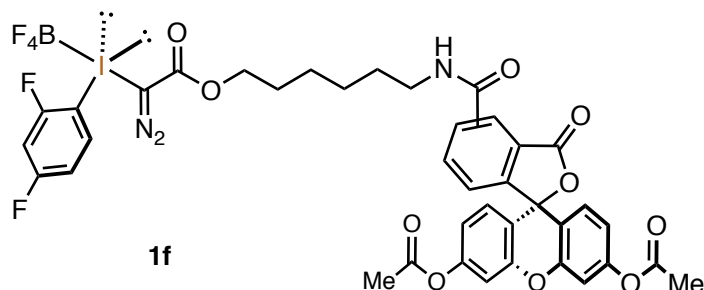

**1f** was prepared according to General Procedure C using (2,4-difluorophenyl)-  $\lambda^3$ -iodanediyl diacetate (0.106 g, 0.30 mmol), boron trifluoride diethyl etherate (0.03 mL, 0.24 mmol), and **S-6** (0.154 mg, 0.24 mmol), with a reaction time of 30 minutes. Trituration using a sonicator (1:4 CH<sub>2</sub>Cl<sub>2</sub>:Et<sub>2</sub>O, 5mLx4, Et<sub>2</sub>O, 5 mL, 10 mL) afforded **1f** (0.169 g, 97%) as a yellow, free-flowing, powder.

**MP:** 82°C (decomposition)

**IR:** 3096, 2937, 2863, 2114, 1758, 1704, 1609, 1586, 1547, 1494, 1421, 1370, 1273, 1197, 1152, 1109, 1013, 892, 853.

**HRMS-(ESI)<sup>+</sup>** (m/z) Found (M-BF<sub>4</sub>): 866.0985, Calc'd C<sub>39</sub>H<sub>31</sub>O<sub>10</sub>N<sub>3</sub>F<sub>2</sub>I requires 866.1017.

**(1-diazo-2-oxo-2-(prop-2-yn-1-yloxy)ethyl)(2,4-difluorophenyl)iodonium tetrafluoroborate. (1g)**

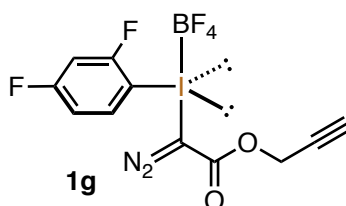

**1g** was prepared according to General Procedure C using (2,4-difluorophenyl)-  $\lambda^3$ -iodanediyl diacetate (0.537 g, 1.5 mmol), boron trifluoride diethyl etherate (0.24 mL, 2.0 mmol), and propargyl diazoacetate (0.244 g, 2.0 mmol), with a reaction time of 30 minutes. The reaction solution was then transferred to a flask containing a solution of 4:26:70 CH<sub>2</sub>Cl<sub>2</sub>:40-60 petroleum ether:Et<sub>2</sub>O (40 mL), and the resulting mixture was triturated using a sonicator, affording **1g** (0.516 g, 77%) as a yellow, free flowing, powder. **1g** shows good stability (>12 months) when stored in a -20 °C freezer.

**MP:** 79°C (decomposition)

**<sup>1</sup>H-NMR** (500 MHz, CD<sub>3</sub>CN)  $\delta$ : 8.25 (app ddd,  $J$  = 5.8, 6.6, 8.4 Hz, 1H), 7.40 (app td,  $J$  = 2.8, 8.8 Hz, 1H), 7.28-7.22 (m, 1H), 4.88 (d,  $J$  = 2.5 Hz, 2H), 2.93 (t,  $J$  = 2.5 Hz, 1H).

**<sup>13</sup>C-NMR** (125 MHz, CDCl<sub>3</sub>)  $\delta$ : 167.0 (dd,  $J$  = 11.2, 257 Hz), 161.3 (dd,  $J$  = 13.6, 256 Hz), 160.0, 139.0 (d,  $J$  = 10.8), 115.4 (d,  $J$  = 23.0 Hz), 106.2 (t,  $J$  = 26.9 Hz), 96.6 ( $J$  = 23.7 Hz), 76.6, 76.5, 55.0, 40.9 (br).

**<sup>19</sup>F-NMR** (376, CD<sub>3</sub>CN)  $\delta$ : -93.7 (d,  $J$  = 12 Hz), -99.9 (app d,  $J$  = 12 Hz), -151.7- -151.9 (m, br).

**IR:** 3292, 2116, 1712, 1695, 1586, 1471, 1424, 1378, 1254, 1184, 1108, 1042, 1003, 962, 864, 814, 765, 731, 673.

**HRMS-(ESI)<sup>+</sup>** (m/z) Found (M-BF<sub>4</sub>): 362.9433, Calc'd C<sub>11</sub>H<sub>6</sub>O<sub>2</sub>N<sub>2</sub>F<sub>2</sub>I requires 362.9437.

#### hex-5-yn-1-yl 2-bromoacetate (**S-7**)

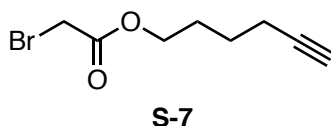

**S-7** was prepared according to General Procedure A using hex-5-yn-1-ol (1.1 mL, 10 mmol), bromoacetyl bromide (2.6 mL, 30 mmol), and sodium bicarbonate (4.29 g, 51 mmol), with a reaction time of 1.5 hours. Diethyl ether was used in the workup. **S-7** was isolated (1.916 g, 87% yield) as a faint brown oil that was of sufficient purity (95%) to be used directly in subsequent transformations.

**<sup>1</sup>H-NMR** (400 MHz, CDCl<sub>3</sub>) δ: 4.21 (t, *J* = 6.4, 2H), 3.84 (s, 2H), 2.26 (td, *J* = 7.0, 2.6 Hz, 2H), 1.97 (t, *J* = 2.6 Hz, 1H), 1.86-1.77 (m, 2H), 1.67-1.57 (m, 2H).

**<sup>13</sup>C-NMR** (100 MHz, CDCl<sub>3</sub>): 167.3, 83.7, 68.0, 65.8, 27.4, 25.9, 24.7 18.0

**IR:** 3294, 2956, 1732, 1455, 1426, 1278, 1162, 1110, 1019, 986, 958, 926, 889.

**HRMS-(ESI)<sup>+</sup>** (m/z) Found (M+H): 219.0023, Calc'd C<sub>8</sub>H<sub>12</sub>O<sub>2</sub>Br requires 219.0021.

#### hex-5-yn-1-yl 2-diazoacetate (**S-8**)

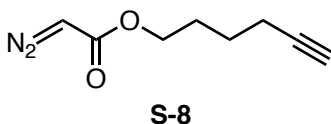

**S-8** was prepared according to General Procedure B using **S-7** (0.78 g, 3.6 mmol), *N,N'*-ditosylhydrazine (1.8 g, 5.3 mmol), and 1,8-diazo-bicyclo-[5.4.0]-undec-7-ene (2.1 mL, 14 mmol), with a reaction time of 1 hour. Diethyl ether was used in the workup. Column chromatography (10% diethyl ether/40-60 petroleum ether) afforded **S-8** (403 mg, 69%) as a yellow oil.

**R<sub>f</sub>**: 0.5 (20% Et<sub>2</sub>O:40-60 Petroleum ether)

**<sup>1</sup>H-NMR** (500 MHz, CDCl<sub>3</sub>) δ: 4.74 (s, br, 1H), 4.19 (t, *J* = 6.4 Hz, 2H), 2.24 (td, *J* = 7.0, 2.6 Hz, 2H), 1.97 (t, *J* = 2.6 Hz, 1H), 1.83-1.74 (m, 2H), 1.65-1.56 (m, 2H).

**<sup>13</sup>C-NMR** (125 MHz, CDCl<sub>3</sub>) δ: 166.9 (br), 83.8, 68.7, 64.3, 46.1 (br), 27.8, 25.8, 18.0.

**IR:** 3292, 2953, 2106, 1681, 1396, 1354, 1240, 1178, 1036, 739, 633.

**HRMS-(ESI)<sup>+</sup>** (m/z) Found (M+H): 167.0813, Calc'd C<sub>8</sub>H<sub>11</sub>O<sub>2</sub>N<sub>2</sub> requires 167.0815

#### (1-diazo-2-(hex-5-yn-1-yloxy)-2-oxoethyl)(2,4-difluorophenyl)iodonium tetrafluoroborate (**1h**)



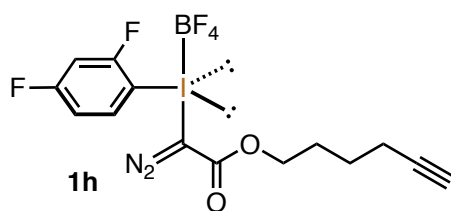

**1h** was prepared according to General Procedure C using (2,4-difluorophenyl)- $\lambda^3$ -iodanediyl diacetate (0.398 g, 1.11 mmol), boron trifluoride diethyl etherate (0.20 mL, 1.4 mmol), and **S-8** (0.239 g, 1.44 mmol), with a reaction time of 30 minutes. Trituration using a sonicator (1:9 40-60 petroleum ether:Et<sub>2</sub>O, 20 mL x2, 1:3 40-60 petroleum ether:Et<sub>2</sub>O, 20 mL) afforded an orange residue. The residue was transferred to a storage vial, and was sonicated with an additional solution of 1:1 40-60 petroleum ether:Et<sub>2</sub>O (5 mL) to yield **1h** (0.420 g, 77%) as a viscous, orange oil.

**<sup>1</sup>H-NMR** (500 MHz, CD<sub>3</sub>CN)  $\delta$ : 8.21 (ddd,  $J=5.7, 6.2, 9.2$  Hz, 1H), 7.37 (app td,  $J=2.8, 8.9$  Hz, 1H), 7.26-7.20 (m, 1H), 4.26, (t,  $J=6.3$  Hz, 2H), 2.24-2.17 (m, 3H), 1.78-1.72 (m, 2H), 1.57-1.50 (m, 2H).

**<sup>13</sup>C-NMR** (125 MHz, CDCl<sub>3</sub>)  $\delta$ : 167.0 (dd,  $J=12, 258$  Hz), 161.4 (dd,  $J=13, 250$  Hz), 160.5, 139.0 (app d,  $J=10$  Hz), 115.6 (app d,  $J=23$  Hz), 106.3 (app t,  $J=26$  Hz), 96.7 (app d,  $J=23$  Hz), 83.9, 69.1, 67.7, 41.3 (br), 27.3, 24.5, 17.4.

**<sup>19</sup>F-NMR** (376 MHz, CD<sub>3</sub>CN)  $\delta$ : -93.9 (d,  $J=12$ Hz), -100 (d,  $J=12$  Hz), -151.4 (s), -151.5 (s).

**IR**: 3289, 2920, 2111, 1705, 1586, 1471, 1425, 1270, 1193, 1152, 1010, 964, 851, 729.

**HRMS (ESI) (m/z)** Found (M-BF<sub>4</sub>): 404.9907, Calc'd C<sub>14</sub>H<sub>12</sub>F<sub>2</sub>O<sub>2</sub>N<sub>2</sub>I requires 404.9906.

#### (2-(cyclohexyloxy)-1-diazo-2-oxoethyl)(2,4-difluorophenyl)iodonium tetrafluoroborate (**1i**)

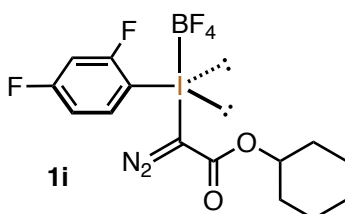

**1i** was prepared according to General Procedure C using (2,4-difluorophenyl)- $\lambda^3$ -iodanediyl diacetate (0.361 g, 1.0 mmol), boron trifluoride diethyl etherate (0.18 mL, 1.3 mmol), and cyclohexyl diazoacetate (0.214 g, 1.27 mmol), with a reaction time of 30 minutes. Trituration using a sonicator (9:1 diethyl ether:40-60 petroleum ether, 20 mL, followed by 1:1 diethyl ether:40-60 petroleum ether, 20 mL) afforded **1i** (1.00 g, 87%) as a yellow, free flowing, powder. Note: additional precipitate can be collected. While the carbon possessing the diazo moiety was not observable by <sup>13</sup>C-NMR, the IR stretch<sup>8</sup> at 2114 cm<sup>-1</sup> as well as the correct mass being observed confirms the presence of the diazo group.

**MP**: 87 °C (decomp)

**<sup>1</sup>H-NMR** (500 MHz, CD<sub>3</sub>CN) δ: 8.21 (app ddd, *J* = 5.8, 6.8, 9.2 Hz, 1H), 7.37 (app dt, *J* = 2.8, 8.9 Hz, 1H), 7.26-7.20 (m, 1H), 4.86 (m, 1H), 1.87-1.79 (m, 2H), 1.75-1.66 (m, 2H), 1.57-1.45 (m, 3H), 1.44-1.26 (m, 3 H).

**<sup>13</sup>C-NMR** (125 MHz, CD<sub>3</sub>CN) δ: 167.0 (app dd, *J* = 11.7, 257 Hz), 161.4 (app dd, *J* = 13.7, 257 Hz), 15.9.8, 139.0 (d, *J* = 11.0 Hz), 115.5 (app dd, *J* = 2.74, 23.7 Hz), 106.3 (app t, *J* = 11.9 Hz), 96.7 (app dd, *J* = 3.4, 23.4 Hz), 77.4, 31.0 (2C), 24.8, 23.1 (2C).

**<sup>19</sup>F-NMR** (376 MHz, CD<sub>3</sub>CN) δ: -92.8 (d, *J* = 12Hz), -100 (d, *J* = 12 Hz), -151.9–152.0 (m).

**IR:** 2946, 2865, 2114, 1698, 1687, 1586, 1471, 1423, 1270, 1192, 1114, 1033, 964, 730.

**HRMS-(ESI)<sup>+</sup>** (m/z) Found (M-BF<sub>4</sub>): 407.0065, Calc'd C<sub>14</sub>H<sub>14</sub>F<sub>2</sub>IN<sub>2</sub>O<sub>2</sub> requires 407.0063.

**(1-diazo-2-ethoxy-2-oxoethyl)(*o*-tolyl)iodonium trifluoromethanesulfonate (**1j**)**

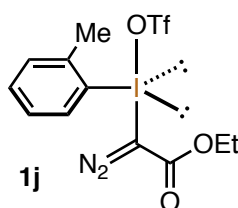

**1j** was prepared according to General Procedure C using (*o*-tolyl)-λ<sup>3</sup>-iodanediyl diacetate (0.503 g, 1.5 mmol), trimethylsilyl trifluoromethanesulfonate (0.36 mL, 3.2 mmol), and ethyl diazoacetate (0.39 mL, 3.2 mmol), with a reaction time of 30 minutes. Trituration using a sonicator (5:20:75 CH<sub>2</sub>Cl<sub>2</sub>:40-60 petroleum ether:Et<sub>2</sub>O, 20 mL, 1:1 Et<sub>2</sub>O:40-60 petroleum ether, 20 mL) afforded an orange residue. The residue was transferred to a storage vial, and was sonicated with an additional solution of Et<sub>2</sub>O:40-60 petroleum ether (10 mL) and 40-60 petroleum ether (10 mL) to yield **1j** (0.258 g, 37%) as an orange, sticky oil.

**<sup>1</sup>H-NMR** (500 MHz, CD<sub>3</sub>CN) δ: 8.19 (dd, *J* = 1.1, 8.3 Hz, 1H), 7.66 ( dt, *J* = 1.1, 7.5 Hz, 1H), 7.61-7.58 (m, 1H), 7.34 (tdd, 0.5, 2.0, 7.0 Hz, 1H), 4.27 (q, 7.0 Hz, 2H), 2.90 (s, 3H), 1.25 (t, *J* = 7.0 Hz), 3H).

**<sup>13</sup>C-NMR** (125 MHz, CD<sub>3</sub>CN) δ: 161.2, 141.8, 137.6, 134.1, 132.0, 129.6, 120.8 (q, *J* = 320 Hz), 64.1, 39.7 (br), 24.8, 13.5.

**<sup>19</sup>F-NMR** (376 MHz, CD<sub>3</sub>CN) δ: -79.7.

**IR:** 3093, 3054, 3018, 2998, 2970, 2108, 1704, 1464, 1448, 1369, 1265, 1235, 1224, 1164, 1024, 759, 732.

**HRMS-(ESI)<sup>+</sup>** (m/z) Found (M-OTf): 330.9944, Calc'd C<sub>11</sub>H<sub>12</sub>O<sub>2</sub>N<sub>2</sub>I requires 330.9938

**(1-diazo-2-ethoxy-2-oxoethyl)(*o*-tolyl)iodonium tetrafluoroborate (1k)**

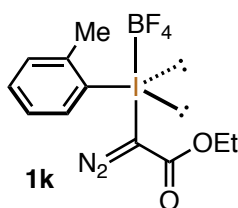

**1k** was prepared according to General Procedure C using (*o*-tolyl)-λ<sup>3</sup>-iodanediyl diacetate (0.505 g, 1.5 mmol), boron trifluoride diethyl etherate (0.24 mL, 2.0 mmol), and ethyl diazoacetate (0.24 mL, 2.0 mmol), with a reaction time of 30 minutes. Trituration using a sonicator (5:20:75 CH<sub>2</sub>Cl<sub>2</sub>:40-60 petroleum ether:Et<sub>2</sub>O, 20 mL, 40-60 petroleum ether, 10 mL) afforded an orange residue. The residue was transferred to a storage vial, and was sonicated with an additional solution of 5:20:75 CH<sub>2</sub>Cl<sub>2</sub>:40-60 petroleum ether:Et<sub>2</sub>O (10 mL) and 40-60 petroleum ether (10 mL) to yield **1k** (0.662 g, 99%) as an orange, sticky oil of ca 90% purity. While the carbon possessing the diazo moiety was not observable by <sup>13</sup>C-NMR, the IR stretch<sup>8</sup> at 2114 cm<sup>-1</sup> as well as the correct mass being observed confirms the presence of the diazo group.

<sup>1</sup>H-NMR (500 MHz, CD<sub>3</sub>CN) δ: 8.21 (dd, *J* = 0.9, 8.2 Hz, 1H), 7.67 (app td, *J* = 0.9, 7.4 Hz, 1H), 7.67-7.61 (m, 1H), 7.41-7.35 (m, 1H), 4.30 (q, *J* = 7.2 Hz, 2H), 2.71 (s, 3H), 1.28 (t, *J* = 7.2 Hz, 3H).

<sup>13</sup>C-NMR (125 MHz, CDCl<sub>3</sub>) δ: 160.7, 141.9, 137.7, 134.3, 132.0, 129.7, 121.0, 64.2, 24.7, 13.4.

<sup>19</sup>F-NMR (376 MHz, CD<sub>3</sub>CN) δ: -151.8– -152 (m, br).

IR: 2114, 1698, 1465, 1271, 964 (br), 730.

HRMS-(ESI)<sup>+</sup> (*m/z*) Found (M-BF<sub>4</sub>): 330.9944, Calc'd C<sub>11</sub>H<sub>12</sub>O<sub>2</sub>N<sub>2</sub>I requires 330.9938.

## Initial reaction optimization on model peptides

A general procedure used for the optimization of the functionalization of **2a** is as follows: To a stirring solution of **2a** was added a solution containing the desired additive (if any was used), followed by a solution containing the relevant iodonium salt. The resulting mixture was allowed to stir for one hour. The resulting solution was then analyzed directly *via* <sup>1</sup>H-NMR using dimethylformamide as an internal standard.

**Table S1:** Optimization of the labeling of **2a** with hypervalent iodine reagents.

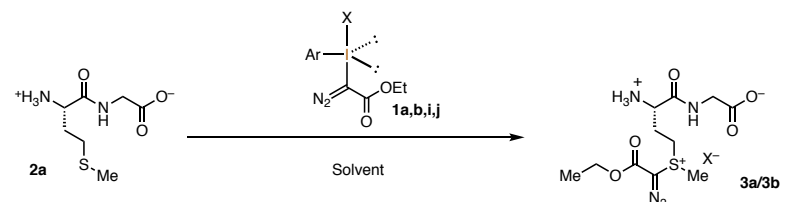

| Entry | [Met-Gly] | Iodonium Salt | [Salt] | Solvent          | atmosphere                          | additive              | % yield <sup>a</sup> (%oxidation) |
|-------|-----------|---------------|--------|------------------|-------------------------------------|-----------------------|-----------------------------------|
| 1     | 50 mM     | 1a            | 50 mM  | H <sub>2</sub> O | ambient                             | —                     | 28% (N/A)                         |
| 2     | 50 mM     | 1i            | 50 mM  | H <sub>2</sub> O | ambient                             | —                     | 38% (N/A)                         |
| 3     | 50 mM     | 1i            | 100 mM | H <sub>2</sub> O | ambient                             | —                     | 76% (N/A)                         |
| 4     | 50 mM     | 1i            | 150 mM | H <sub>2</sub> O | ambient                             | —                     | 85% (N/A)                         |
| 5     | 50 mM     | 1j            | 150 mM | D <sub>2</sub> O | ambient                             | —                     | 95% (N/A)                         |
| 6     | 5 mM      | 1j            | 100 mM | D <sub>2</sub> O | ambient                             | —                     | 68% (N/A)                         |
| 7     | 5 mM      | 1b            | 50 mM  | D <sub>2</sub> O | ambient                             | —                     | 72% (17%)                         |
| 8     | 5 mM      | 1b            | 50 mM  | D <sub>2</sub> O | sparged w/<br>N <sub>2</sub> 30 min | —                     | 79% (<5%)                         |
| 9     | 5 mM      | 1b            | 50 mM  | D <sub>2</sub> O | ambient                             | TEMPO (10 mM)         | 70% (<5%)                         |
| 10    | 5 mM      | 1b            | 50 mM  | D <sub>2</sub> O | ambient                             | Ascorbic Acid (10 mM) | 73% (<5%)                         |
| 11    | 5 mM      | 1b            | 50 mM  | D <sub>2</sub> O | ambient                             | thiourea (10 mM)      | 94% (<5%)                         |
| 12    | 500 μM    | 1b            | 50 mM  | D <sub>2</sub> O | ambient                             | thiourea (10 mM)      | >90% (N/A)                        |
| 13    | 500 μM    | 1b            | 50 mM  | D <sub>2</sub> O | ambient                             | —                     | trace (N/A)                       |
| 14    | 500 μM    | 1b            | 50 mM  | D <sub>2</sub> O | sparged w/<br>N <sub>2</sub> 30 min | —                     | ~50% (N/A)                        |
| 15    | 5 mM      | 1b            | 25 mM  | D <sub>2</sub> O | ambient                             | thiourea (10 mM)      | 81% (<5%)                         |
| 16    | 5 mM      | 1b            | 50 mM  | D <sub>2</sub> O | ambient                             | thiourea (5 mM)       | 74% (9%)                          |
| 17    | 5 mM      | 1b            | 50 mM  | D <sub>2</sub> O | ambient                             | thiourea (20 mM)      | >95% (trace)                      |
| 18    | 5 mM      | 1b            | 50 mM  | D <sub>2</sub> O | ambient                             | thiourea (50 mM)      | 34% (trace)                       |

<sup>a</sup>reactions were stirred for one hour, and were analyzed directly *via* <sup>1</sup>H-NMR using DMF (13 mM) as an internal standard.

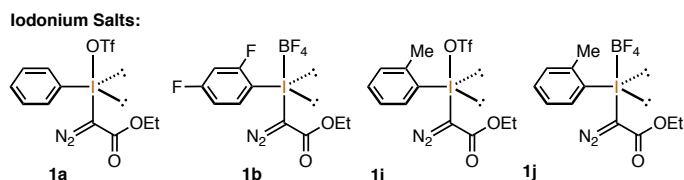

**((S)-3-amino-4-((carboxymethyl)amino)-4-oxobutyl)(1-diazo-2-ethoxy-2-oxoethyl)(methyl)sulfonium tetrafluoroborate (3b)**

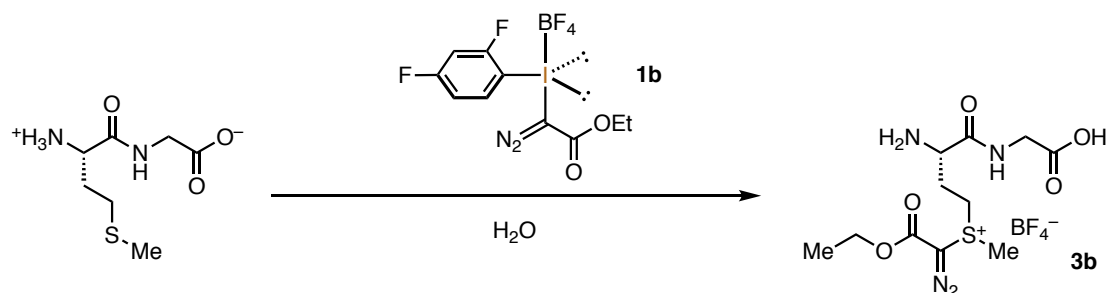

A round-bottomed flask equipped with a magnetic stir-bar was charged with methionine-glycine (11 mg, 0.052 mmol) and then evacuated and refilled with  $\text{N}_2$ . To the flask was added a freshly degassed solution of **1b** (0.3 M in  $\text{H}_2\text{O}$ , 0.5 mL), and the resulting solution was allowed to stir for 1 hour at room temperature. The resulting heterogeneous solution was then diluted with water and ethyl acetate and the layers separated by decanting the organic layer. The aqueous layer was washed twice with ethyl acetate in the same fashion. The aqueous layer was then evaporated to dryness *in vacuo*. The resulting faint yellow residue was then redissolved in a minimal amount of acetonitrile and precipitated with ether in a  $4^\circ\text{C}$  refrigerator. The supernatant was decanted, and the residue was dried *in vacuo* to yield **3b** as a faint yellow residue (17 mg, 82%, 1:1 mixture of diastereomers). **3b** is considerably hygroscopic and should be stored in a  $-20^\circ\text{C}$  freezer.

$^1\text{H-NMR}$  (500 MHz,  $\text{D}_2\text{O}$ )  $\delta$ : 4.42 (app q,  $J = 7.0$  Hz, 2H), 4.24 (app t,  $J = 6.2$  Hz, 1H), 4.05-3.90 (m, 3H), 3.81-3.70 (m, 1H), 3.34 (s, 1.5H), 3.33 (s, 1.5H), 2.57-2.39 (m, 2H), 1.34 (app t,  $J = 7.0$  Hz, 3H).

$^{13}\text{C-NMR}$  (125 MHz,  $\text{D}_2\text{O}$ )  $\delta$ : 174.2 (br, 2C), 167.8, 167.7, 161.1 (2C), 64.5, 53.7 (br), 51.3, 51.2, 42.2 (2C), 39.4, 39.2, 23.4 (br, 2C), 25.5, 25.4, 13.2.

IR: 2989, 2150, 1690 (br), 1547 (br), 1393, 1370, 1277, 1003 (br), 737.

HRMS-(ESI) $^+$  (m/z) Found ( $\text{M}^+$ ): 319.1016, Calc'd  $\text{C}_{11}\text{H}_{19}\text{O}_5\text{N}_4$  requires 319.1071.

## Protein Modification

A general procedure used for the optimization of the functionalization of exenatide•OAc with **1b** is as follows: To a stirring solution of **exenatide•OAc** was added a solution containing the desired additive (if any was used), followed by a solution containing **1b**. The resulting mixture was allowed to stir for the time depicted. The resulting solution was then analyzed directly *via* LC/MS.

**Table S2.** Optimization of the labeling of Exenatide•OAc with **1b**.

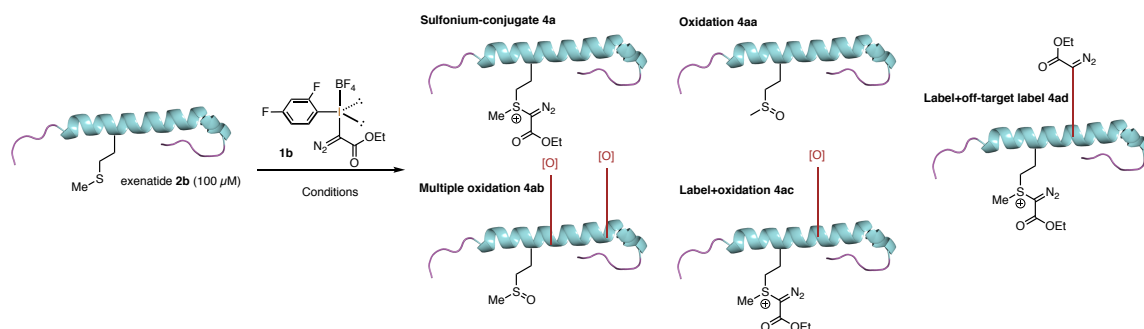

| Entry          | [1b]  | Additive                                               | Solvent                                  | atmosphere | t °C | T(min) | %conversion | %4a           | %4aa | %4ab | %4ac | %4ad |
|----------------|-------|--------------------------------------------------------|------------------------------------------|------------|------|--------|-------------|---------------|------|------|------|------|
| 1 <sup>a</sup> | 50 mM | none                                                   | H <sub>2</sub> O                         | ambient    | RT   | 30     | >95%        | Decomposition |      |      |      |      |
| 2 <sup>a</sup> | 50 mM | none                                                   | 1:1 H <sub>2</sub> O: CH <sub>3</sub> CN | ambient    | RT   | 30     | >95%        | 10%           | 22%  | —    | —    | —    |
| 3 <sup>a</sup> | 50 mM | TEMPO (5 mM)                                           | H <sub>2</sub> O                         | ambient    | RT   | 30     | >95%        | 12%           | 8%   | —    | —    | —    |
| 4 <sup>a</sup> | 50 mM | TEMPO (5 mM)                                           | 1:1 H <sub>2</sub> O: CH <sub>3</sub> CN | ambient    | RT   | 30     | >95%        | —             | —    | 81%  | 19%  | —    |
| 5 <sup>a</sup> | 50 mM | thiourea (20 mM)                                       | 1:1 H <sub>2</sub> O: CH <sub>3</sub> CN | ambient    | RT   | 5      | >95%        | 68%           | 2%   | —    | 27%  | 4%   |
| 6 <sup>a</sup> | 50 mM | thiourea (20 mM)<br>TEMPO (5 mM)                       | 1:1 H <sub>2</sub> O: CH <sub>3</sub> CN | ambient    | RT   | 5      | >95%        | 93%           | 1%   | —    | 1%   | 4%   |
| 7 <sup>a</sup> | 50 mM | thiourea (20 mM)<br>TEMPO (5 mM)<br>Formic Acid (5 mM) | 1:1 H <sub>2</sub> O: CH <sub>3</sub> CN | ambient    | RT   | 5      | >95%        | >95%          | 1%   | —    | 1%   | 1%   |
| 8 <sup>a</sup> | 50 mM | thiourea (20 mM)<br>TEMPO (5 mM)<br>Formic Acid (5 mM) | H <sub>2</sub> O                         | ambient    | RT   | 5      | >95%        | >95%          | 1%   | —    | 1%   | 1%   |

<sup>a</sup> Reaction Conversions and ratios estimated by LC/MS TIC.

### **General Optimal Procedure A for Protein Modification**

A 2 mL vial equipped with a magnetic stirrer was charged with a solution containing the desired protein (1 mM in 0.1M thiourea (aq), 20  $\mu$ L). To the vial was added thiourea (100 mM in H<sub>2</sub>O, 20 $\mu$ L), formic acid (100 mM, 10  $\mu$ L), and H<sub>2</sub>O (20  $\mu$ L). The vial was chilled in an ice bath. To the chilled solution was added TEMPO (33 mM in H<sub>2</sub>O, 30  $\mu$ L) and the vial was stirred vigorously. To the stirring solution was added the iodonium salt (100 mM in CH<sub>3</sub>CN or H<sub>2</sub>O, 100  $\mu$ L) and the resulting solution stirred for 5 minutes at 0° C. The resulting mixture was then extracted twice with diethyl ether or ethyl acetate. The remaining organic volatiles were then removed from the aqueous layer using a rotary evaporator. The resulting solution was then analyzed directly *via* LC/MS.

### **General Optimal Procedure B for Protein Modification**

A 2 mL vial equipped with a magnetic stirrer was charged with a solution containing the desired protein (1 mM in 100 mM thiourea (aq), 20  $\mu$ L). To the vial was added thiourea (100 mM in H<sub>2</sub>O, 20 $\mu$ L), and H<sub>2</sub>O (30  $\mu$ L). The vial was chilled in an ice bath. To the chilled solution was added TEMPO (33 mM in H<sub>2</sub>O, 30  $\mu$ L) and the vial was stirred vigorously. To the stirring solution was added the iodonium salt (100 mM in CH<sub>3</sub>CN or H<sub>2</sub>O, 100  $\mu$ L) and the resulting solution stirred for 5 minutes at 0° C. The resulting mixture was then extracted twice with diethyl ether or ethyl acetate. The remaining organic volatiles were then removed from the aqueous layer using a rotary evaporator. The resulting solution was then analyzed directly *via* LC/MS.

## Functionalization of Exenatide acetate with **1b** to form **4a**.

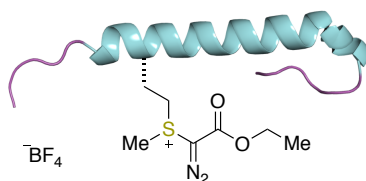

The labeling of exenatide was performed at 0°C using general procedure A using **1b** (100 mM in CH<sub>3</sub>CN) and 1:1 diethyl ether:ethyl acetate in the extraction step. The resulting solution was then analyzed directly *via* LC/MS Pentafluorophenyl column (50 x 2.1 mm, 2.6µm), Gradient: 5-95% B over 5 min then hold for 0.5 min, 0.7 ml/min) and was judged to have proceeded in >95% conversion (**Figure S1-A**).

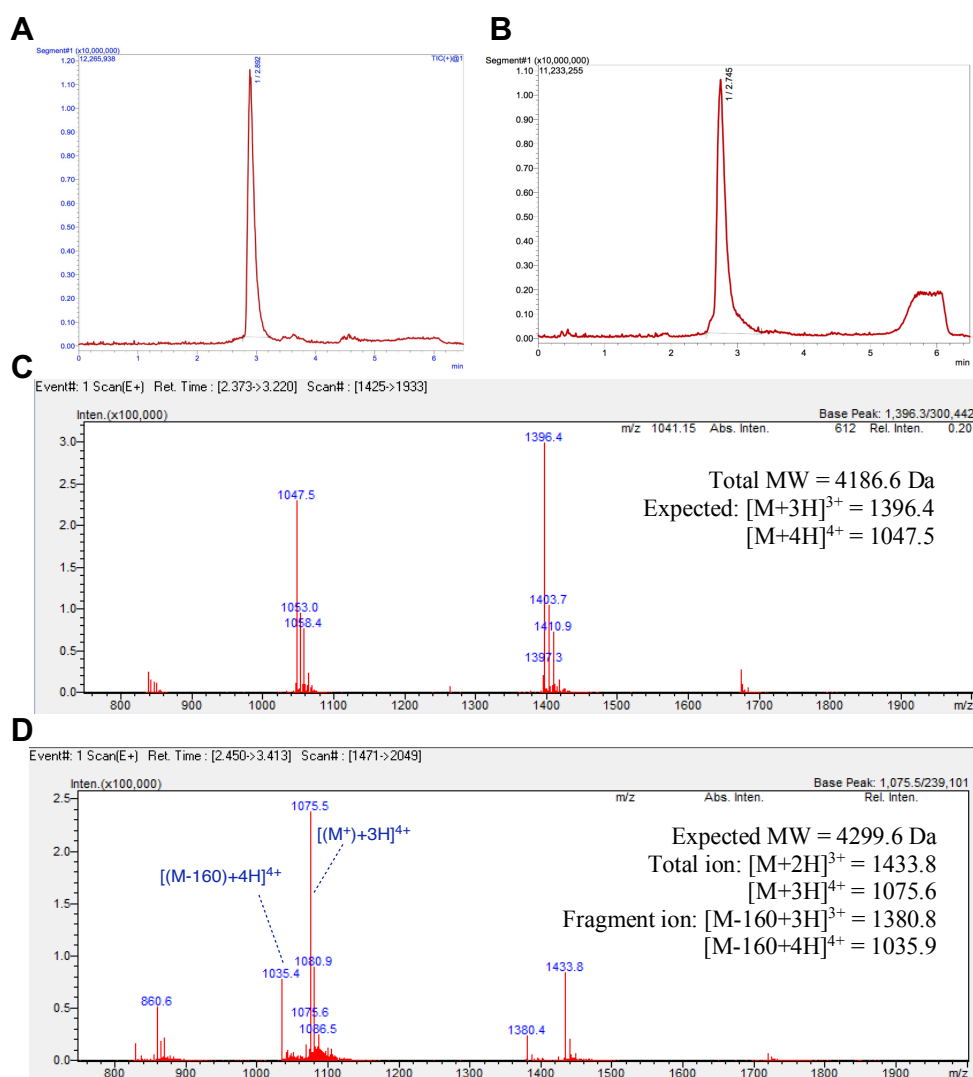

**Figure S1-A.** (A) Mass trace of parent exenatide•OAc. (B) Mass trace of the crude mixture between exenatide and **1b**. (C) Mass chromatogram of exenatide (positive ionization mode, TIC from  $T_r=2.5-3.2$  min.) (D) Mass chromatogram of the crude reaction to form **4b** (positive ionization mode, TIC from  $T_r=2.31-3.16$  min.)



**Functionalization of Exenatide acetate with **1b** to form **4a** in pure aqueous conditions.**

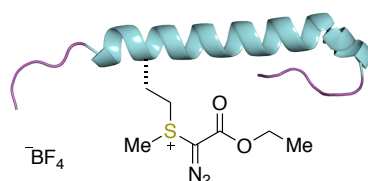

The labeling of exenatide was performed at room temperature using general procedure A using **1b** (100 mM in H<sub>2</sub>O) and 1:1 diethyl ether:ethyl acetate in the extraction step. The resulting solution was then analyzed directly *via* LC/MS C18 column (50 x 2.1 mm, 2.6 $\mu$ m), Gradient: 5-95% B over 5 min then hold for 0.5 min, 0.7 ml/min) and was judged to have proceeded in >95% conversion (**Figure S1-B**).

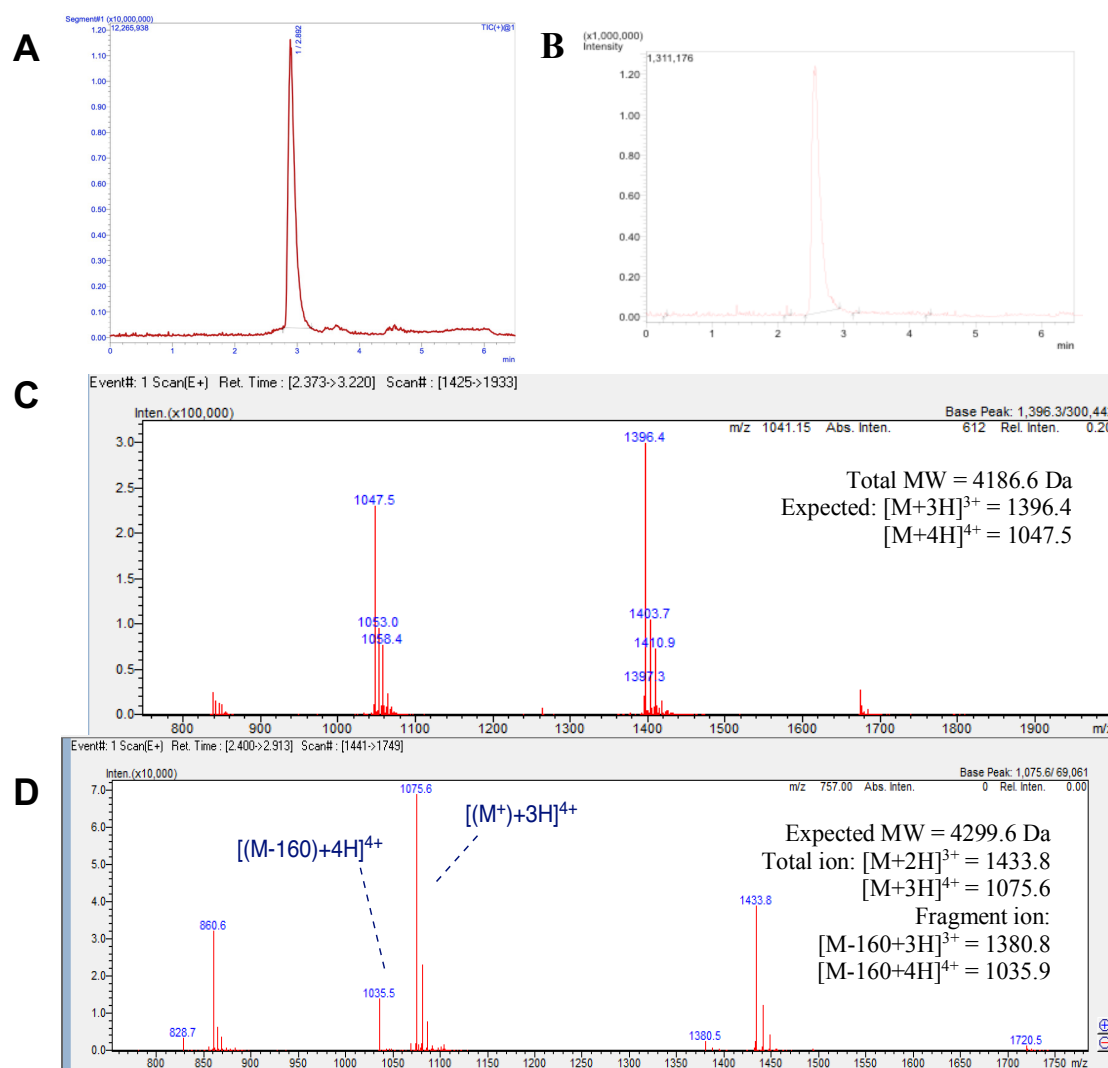

**Figure S1-B.** (A) Mass trace of parent exenatide·OAc. (B) Mass trace of the crude mixture between exenatide and **1b**. (C) Mass chromatogram of exenatide (positive ionization mode, TIC from  $T_R=2.5$ -3.2 min.) (D) Mass chromatogram of the crude reaction to form **4a** (positive ionization mode, TIC from  $T_R=2.40$ -2.91 min.)

**Functionalization of Exenatide acetate with **1b** to form **4a** using a pre-made mixture (stock solution) of reagents.**

The labeling of exenatide was performed as follows: to a solution of exenatide (1 mM, 20  $\mu$ L, H<sub>2</sub>O) was added an aqueous stock solution (80  $\mu$ L) containing thiourea (50 mM), TEMPO (12.5 mM), and formic acid (12.5 mM). The resulting solution was chilled and rapidly stirred. To the rapidly stirring solution was added **1b** (100  $\mu$ L, CH<sub>3</sub>CN), and the resulting stirred for 5 minutes. and the resulting solution stirred for 5 minutes at 0° C. The resulting mixture was then extracted twice with diethyl ether. The remaining organic volatiles were then removed from the aqueous layer using a rotary evaporator. The resulting solution was then analyzed directly *via* LC/MS, Pentafluorophenyl column (50 x 2.1 mm, 2.6 $\mu$ m), Gradient: 5-95% B over 5 min then hold for 0.5 min, 0.7 ml/min) and was judged to have proceeded in >95% conversion (**Figure S1-C**).

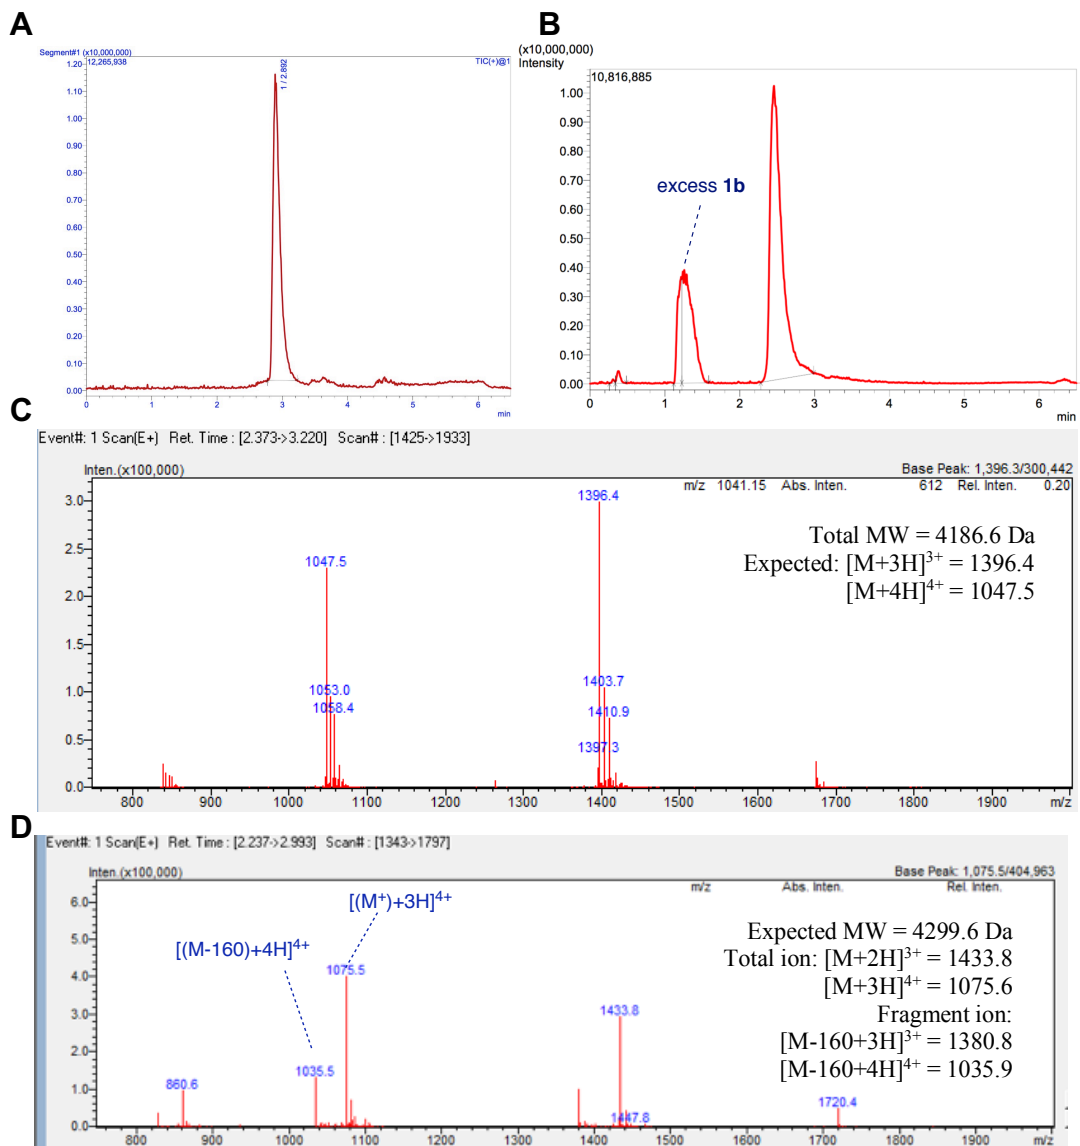

**Figure S1-C.** (A) Mass trace of parent exenatide•OAc. (B) Mass trace of the crude mixture between exenatide and 1b. (C) Mass chromatogram of exenatide (positive ionization mode, TIC from  $T_r=2.5$ -3.2 min.) (D) Mass chromatogram of the crude reaction to form 4b (positive ionization mode, TIC from  $T_r=2.29$ -3.69 min.)

## Functionalization of Exenatide•OAc with **1d** to form **4g**.

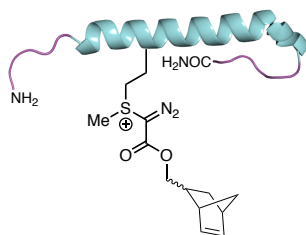

The labeling of exenatide was performed according to general procedure A using **1d** (100 mM in CH<sub>3</sub>CN) and 1:1 diethyl ether:ethyl acetate in the extraction step. The resulting solution was then analyzed directly *via* LC/MS (Pentafluorophenyl column (50 x 2.1 mm, 2.6 $\mu$ m), Gradient: 5-95% B over 5 min then hold for 0.5 min, 0.7 ml/min), and was judged to have proceeded in >95% conversion (**Figure S2**).

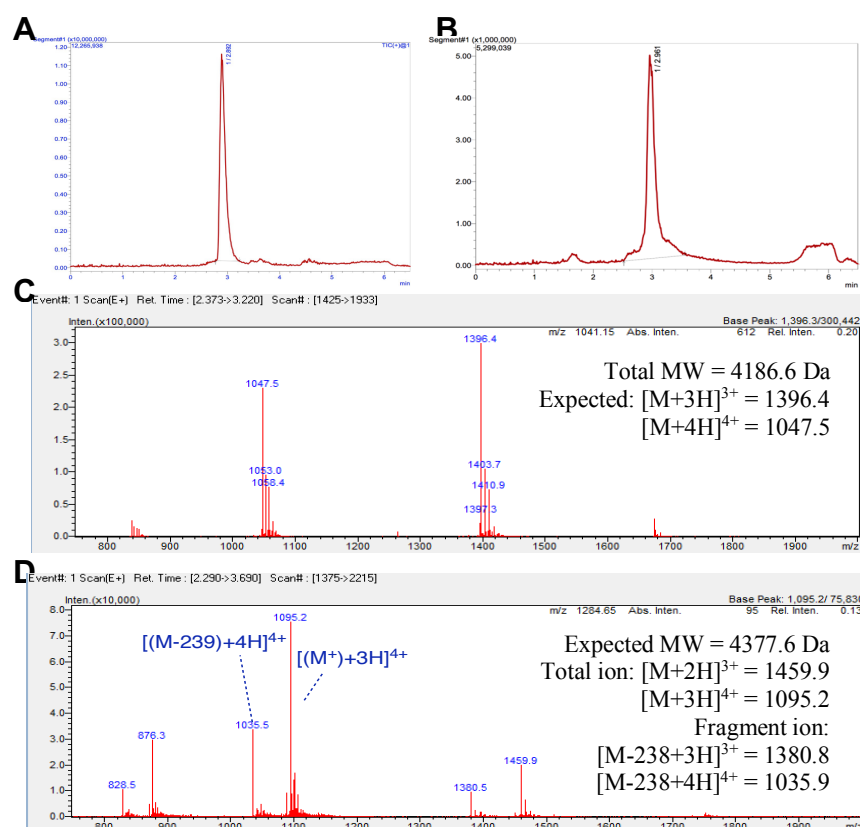

**Figure S2.** (A) Mass trace of parent exenatide•OAc. (B) Mass trace of the crude mixture between exenatide and **1d**. (C) Mass chromatogram of exenatide (positive ionization mode, TIC from  $T_r=2.5-3.2$  min.) (D) Mass chromatogram of the crude reaction to form **4b** (positive ionization mode, TIC from  $T_r=2.29-3.69$  min.)

## Functionalization of Exenatide•OAc with 1e to form 4c

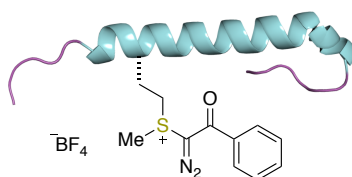

A 2 mL vial equipped with a magnetic stirrer was charged with a solution containing Exenatide•OAc (1 mM in H<sub>2</sub>O, 40  $\mu$ L). To the vial was added *N*-phenylthiourea (0.1 M in H<sub>2</sub>O, 40  $\mu$ L). The vial was chilled in an ice bath. To the chilled solution was added TEMPO (200 mM in CH<sub>3</sub>CN, 30  $\mu$ L) and the vial was stirred vigorously. To the stirring solution was added the iodonium salt (0.1 M in CH<sub>3</sub>CN, 100  $\mu$ L) and the resulting solution stirred for 30 minutes at 0° C. The resulting mixture was then extracted twice with diethyl ether or ethyl acetate. The remaining organic volatiles were then removed from the aqueous layer using a rotary evaporator. The resulting solution was then analyzed directly *via* LC/MS (Pentafluorophenyl column (50 x 2.1 mm, 2.6 $\mu$ m), Gradient: 5-95% B over 5 min then hold for 0.5 min, 0.7 ml/min), and was judged to have proceeded in 87% conversion (**Figure S3**).

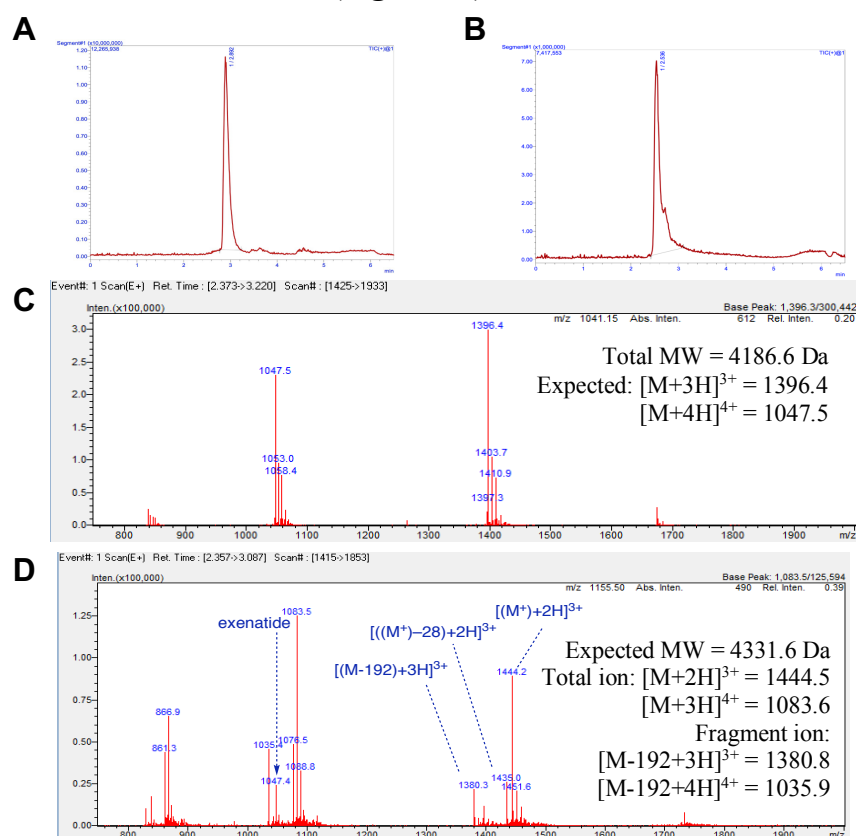

**Figure S3.** (A) Mass trace of parent exenatide•OAc. (B) Mass trace of the crude mixture between exenatide and 1e. (C) Mass chromatogram of exenatide (positive ionization mode, TIC from T<sub>r</sub>=2.5-3.2 min.) (D) Mass chromatogram of the crude reaction to form 4d (positive ionization mode, TIC from T<sub>r</sub>=2.36-3.07 min.)

## Functionalization of Exenatide•OAc with 1c to form 4d.

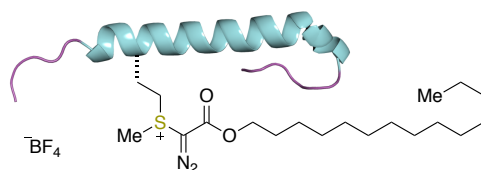

The labeling of exenatide was performed according to general procedure A using **1c** (100 mM in CH<sub>3</sub>CN) and 1:1 diethyl ether:ethyl acetate in the extraction step. The resulting solution was then analyzed directly *via* LC/MS (Pentafluorophenyl column (50 x 2.1 mm, 2.6 $\mu$ m), Gradient: 5-95% B over 5 min then hold for 0.5 min, 0.7 ml/min), and was judged to have proceeded in >95% conversion with an estimated 94% formation of **4d** and a 2% formation of exenatide sulfoxide (47:1 ratio) (**Figure S4**).

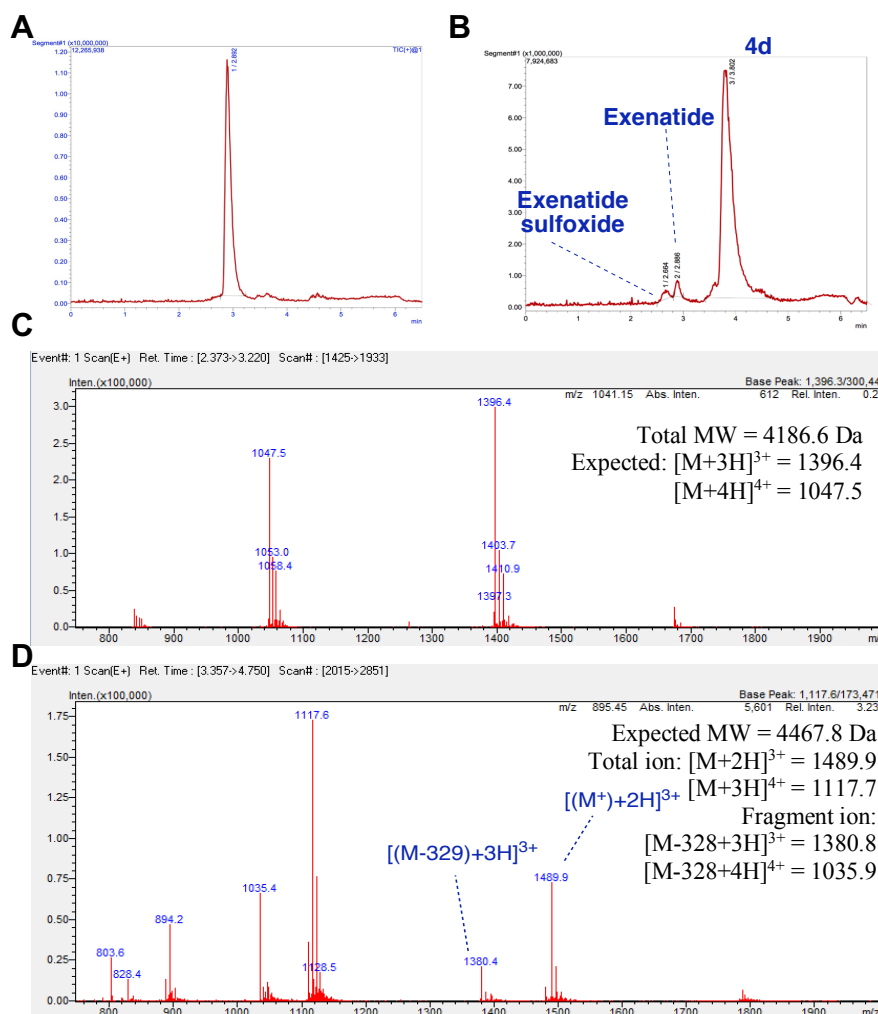

**Figure S4.** (A) Mass trace of parent exenatide•OAc. (B) Mass trace of the crude mixture between exenatide and **1c**. (C) Mass chromatogram of exenatide (positive ionization mode, TIC from T<sub>r</sub>=2.5-3.2 min.) (D) Mass chromatogram of the crude reaction to form **4d** (positive ionization mode, TIC from T<sub>r</sub>=3.36-4.75 min.)

## Functionalization of Exenatide•OAc with **1f** to form **4e**.

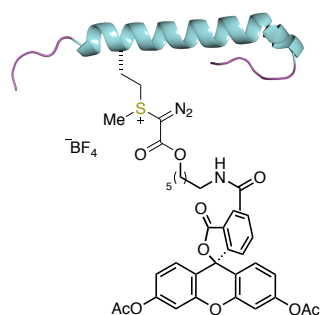

The labeling of exenatide was performed according to general procedure A using **1f** (100 mM in CH<sub>3</sub>CN) and 1:1 diethyl ether:ethyl acetate in the extraction step. The resulting solution was then analyzed directly *via* LC/MS (Pentafluorophenyl column (50 x 2.1 mm, 2.6 $\mu$ m), Gradient: 5-95% B over 5 min then hold for 0.5 min, 0.7 ml/min), and was judged to have proceeded in 84% conversion, with an estimated 80% formation of **4e** and 4% exenatide sulfoxide (20:1 ratio) (**Figure S5**).

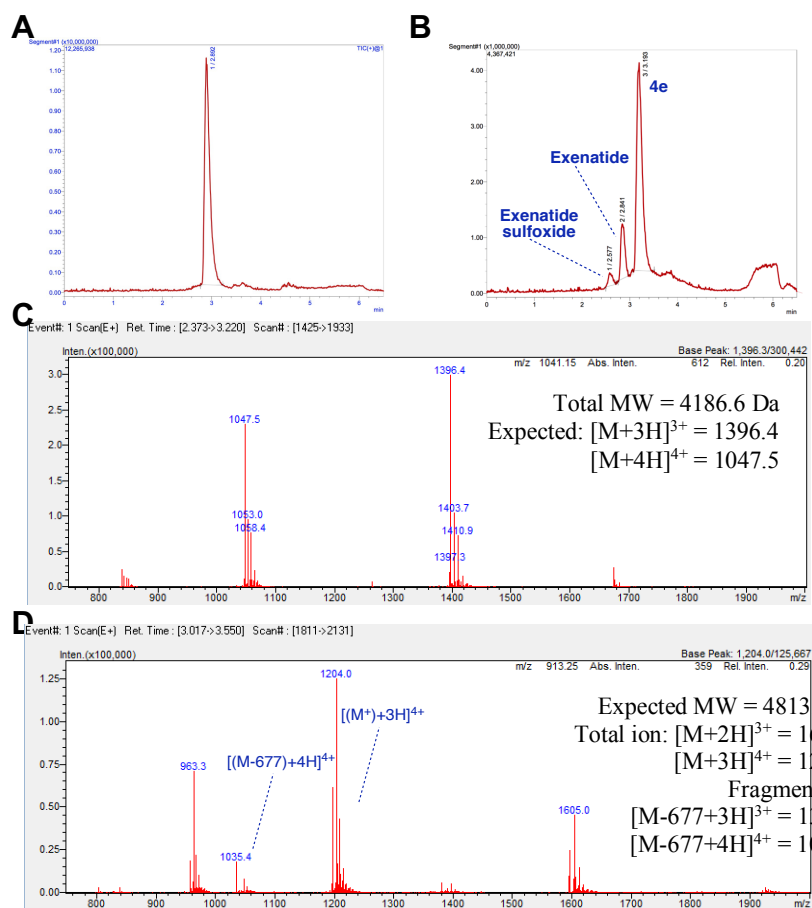

**Figure S5.** (A) Mass trace of parent exenatide•OAc. (B) Mass trace of the crude mixture between exenatide and **1f**. (C) Mass chromatogram of exenatide (positive ionization mode, TIC from T<sub>r</sub>=2.5-3.2 min.) (D) Mass chromatogram of the crude reaction to form **4e** (positive ionization mode, TIC from T<sub>r</sub>=3.02-3.55 min.)

## Functionalization of Exenatide•OAc with **1g** to form **4f**

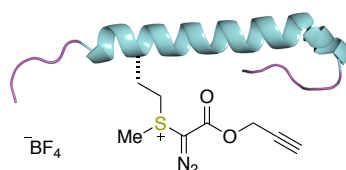

The labeling of exenatide was performed according to general procedure A using **1g** (100 mM in CH<sub>3</sub>CN) and 1:1 diethyl ether:ethyl acetate in the extraction step. The resulting solution was then analyzed directly *via* LC/ MS (Pentafluorophenyl column (50 x 2.1 mm, 2.6 $\mu$ m), Gradient: 5-95% B over 5 min then hold for 0.5 min, 0.7 ml/min), and was judged to have proceeded in >95% conversion (**Figure S6**).

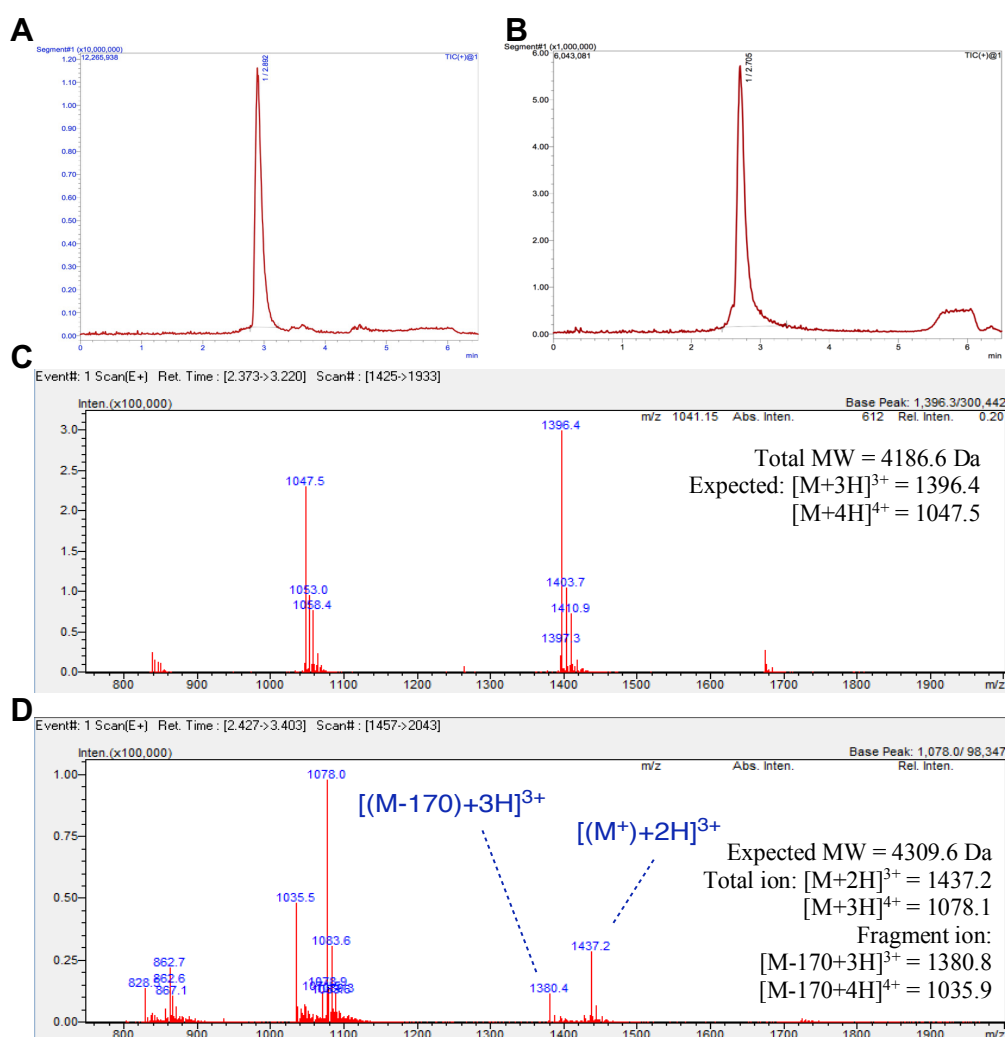

**Figure S6.** (A) Mass trace of parent exenatide•OAc. (B) Mass trace of the crude mixture between exenatide and **1g**. (C) Mass chromatogram of exenatide (positive ionization mode, TIC from  $T_r$ =2.5-3.2 min.) (D) Mass chromatogram of the crude reaction to form **4f** (positive ionization mode, TIC from  $T_r$ =2.43-3.40 min.)



## Large Scale Synthesis of 4f

A 2 mL vial equipped with a magnetic stirrer was charged with Exenatide•OAc (2.8 mM in 100 mM thiourea (aq), 70  $\mu$ L (~0.83 mg peptide)). To the vial was added formic acid (100 mM, 20  $\mu$ L), and H<sub>2</sub>O (30  $\mu$ L). The vial was chilled in an ice bath. To the chilled solution was added TEMPO (33 mM in H<sub>2</sub>O, 50  $\mu$ L) and the vial was stirred vigorously. To the stirring solution was added **1g** (100 mM in CH<sub>3</sub>CN 180  $\mu$ L) and the resulting solution stirred for 5 minutes at 0° C. The resulting mixture was then extracted twice with 1:1 diethyl ether:ethyl acetate. The remaining organic volatiles were then removed from the aqueous layer using a rotary evaporator. Purification *via* reverse-phase HPLC\* (C18 column (150 x 10 mm, 10 $\mu$ m), Gradient: 5-55% B over 9 min then 55-95% B over 1 min, hold for 1.5 min, then 95-5%B over 0.5 min, hold for 3 min, 5 ml/min), followed by lyophilization yielded **4f** as a sticky, off-white solid (1 mg) that was immediately redissolved in H<sub>2</sub>O (500  $\mu$ L) and stored at -20°C. Concentration analysis by A<sub>280</sub> indicated a 1.4 mg/mL solution (79% isolated yield). \*Note: Purification of **4f** should be carried out expediently as prolonged purification times can lead to low levels of peptide backbone hydrolysis.

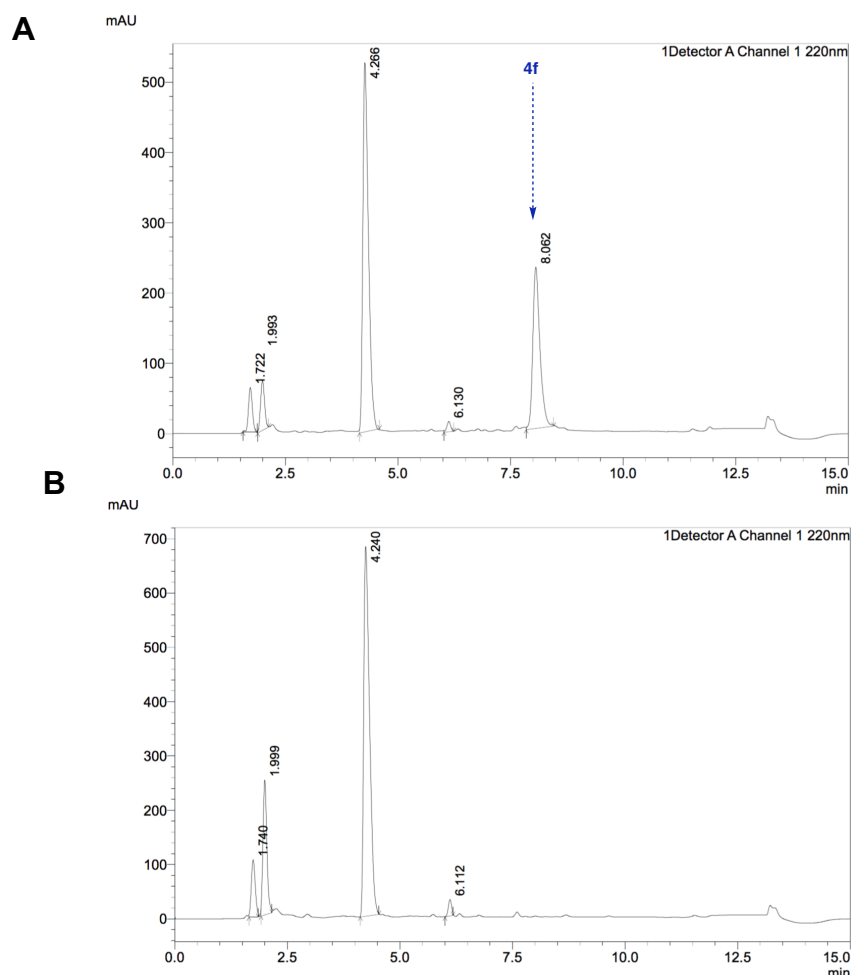

**Figure S7.** (A) HPLC trace of the crude reaction mixture of exenatide•OAc and **1g**. (B) HPLC trace of a similar reaction wherein exenatide•OAc was NOT added.

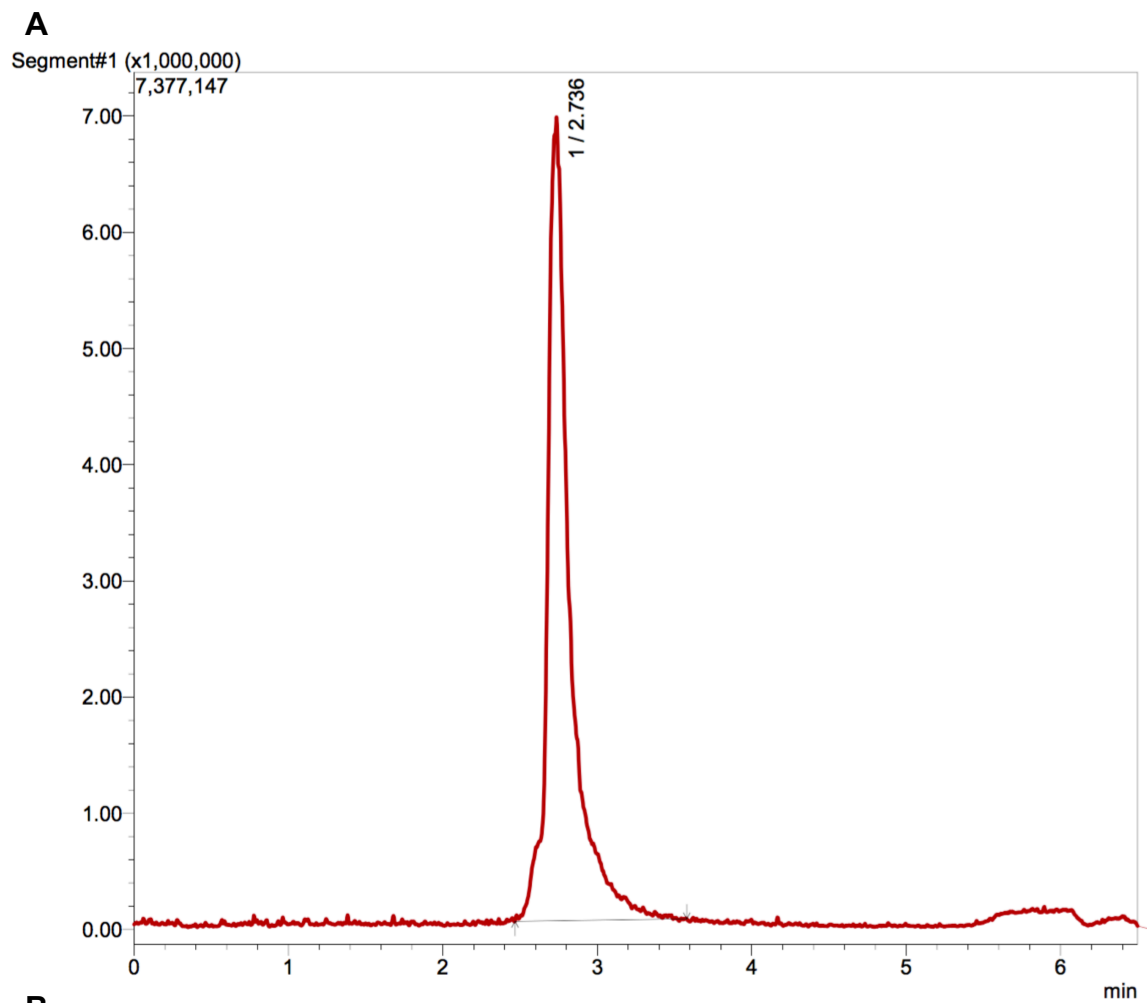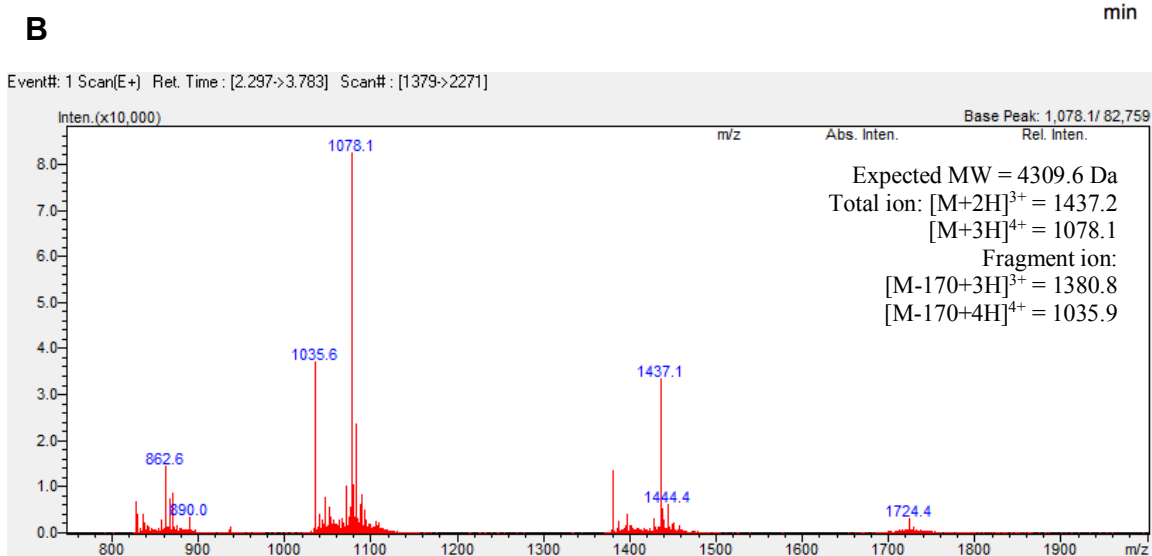

**Figure S8. (A) Mass trace of purified 4f. (B) Mass spectrum of purified 4f.**

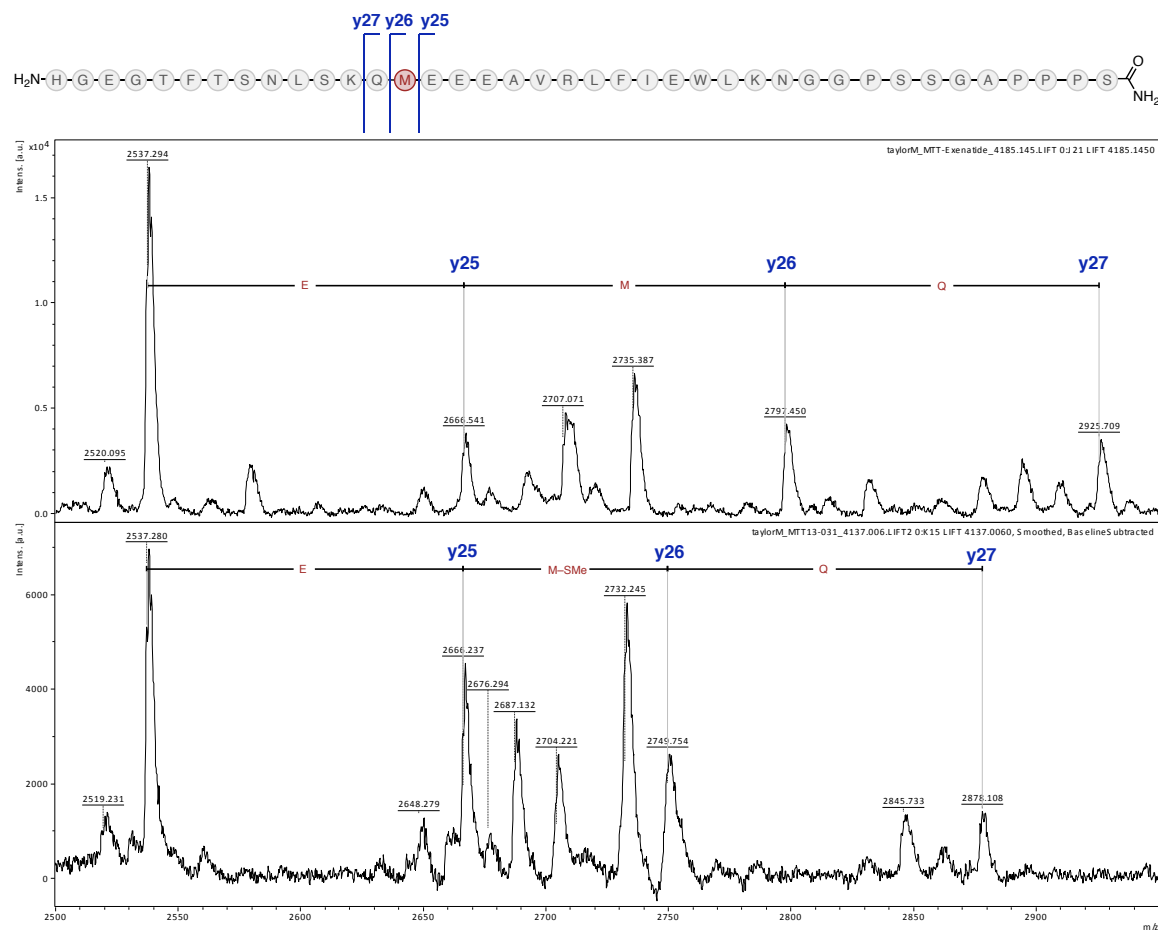

**Figure S9.** (A) MS/MS chromatogram of Exenatide (**4**) highlighting the y25, y26, and y27 fragments. (B) MS/MS chromatogram of conjugate **4f** highlighting the y25, y26, and y27 fragments of (4f-170)<sup>+</sup> fragment. The difference of 48 mass units on the y26 mass between the two spectra confirm modification of the methionine residue in exenatide.

### CD spectra of exenatide conjugate 4f

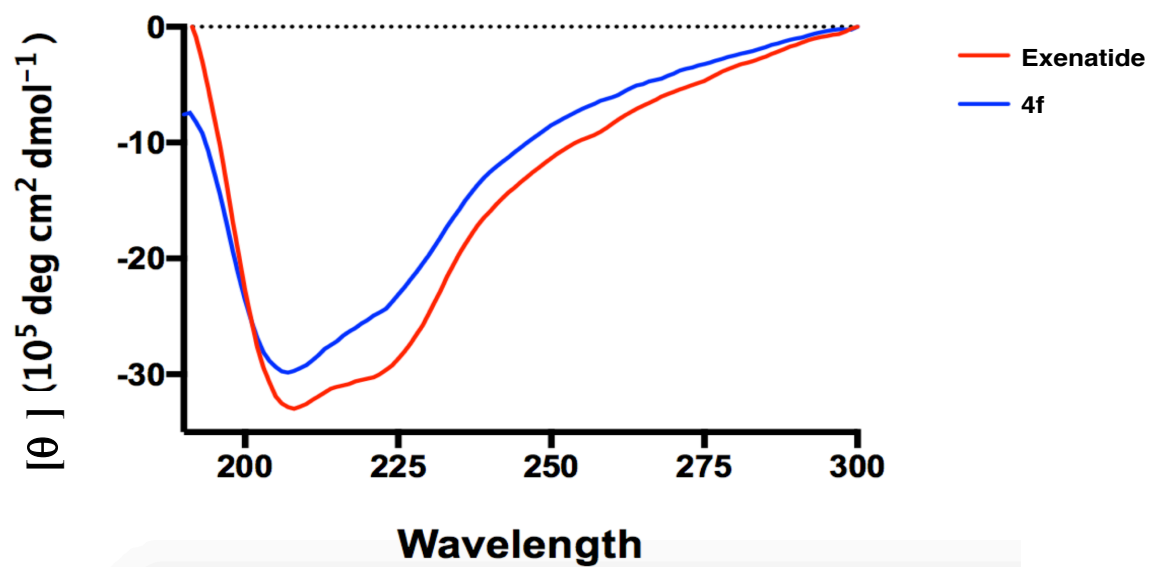

**Figure S10.** CD spectra of **4f** (5  $\mu\text{M}$ ) in 5 mM pH 7.4 phosphate buffer (blue line), and Exenatide (5  $\mu\text{M}$ ) in 5 mM pH 7.4 phosphate buffer (red line). **4f** displays the diagnostic profile of a helical peptide and indicates that the secondary structure of the peptide is not significantly affected by the methionine modification.

## Functionalization of Exenatide•OAc with **1i** to form **4b**

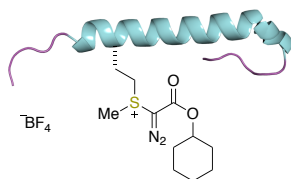

A 2 mL vial equipped with a magnetic stirrer was charged with Exenatide•OAc (1.8 mM in 100 mM thiourea (aq), 160  $\mu$ L (~1.2 mg peptide)). To the vial was added formic acid (100 mM, 40  $\mu$ L), and H<sub>2</sub>O (80  $\mu$ L). The vial was chilled in an ice bath. To the chilled solution was added TEMPO (67 mM in H<sub>2</sub>O, 120  $\mu$ L) and the vial was stirred vigorously. To the stirring solution was added **1i** (100 mM in CH<sub>3</sub>CN 400  $\mu$ L) and the resulting solution stirred for 5 minutes at 0° C. The resulting mixture was then extracted twice with 1:1 diethyl ether:ethyl acetate. The remaining organic volatiles were then removed from the aqueous layer using a rotary evaporator. The resulting solution was then analyzed directly *via* LC/MS (Pentafluorophenyl column (50 x 2.1 mm, 2.6 $\mu$ m), Gradient: 5-95% B over 5 min then hold for 0.5 min, 0.7 ml/min), and was judged to have proceeded in >95% conversion (**Figure S11**).

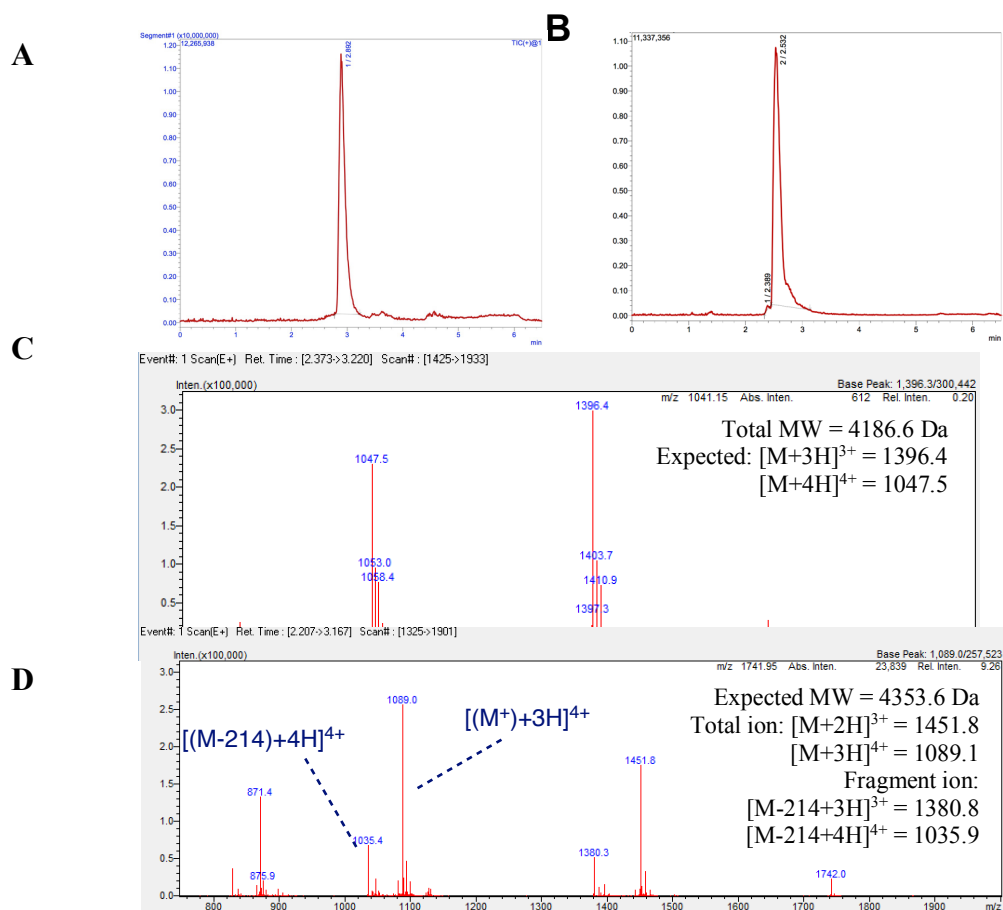

**Figure S11.** (A) Mass trace of parent exenatide•OAc. (B) Mass trace of the crude mixture between exenatide and **1i**. (C) Mass chromatogram of exenatide (positive ionization mode, TIC from  $T_r$ =2.37-3.22 min.) (D) Mass chromatogram of the crude reaction to form **4b** (positive ionization mode, TIC from  $T_r$ =2.64-3.65 min.)

## Functionalization of Aviptadil•OAc with **1b** to form **5**.

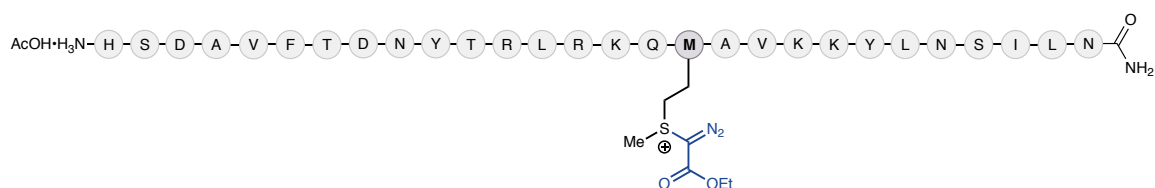

The labeling of aviptadil was performed according to general procedure B using **1b** (100 mM in H<sub>2</sub>O) and 1:1 diethyl ether:ethyl acetate in the extraction step. The resulting solution was then analyzed directly *via* LC/MS (Pentafluorophenyl column (50 x 2.1 mm, 2.6 $\mu$ m), Gradient: 5-95% B over 5 min then hold for 0.5 min, 0.7 ml/min), and was judged to have proceeded in >95% conversion (**Figure S12**).

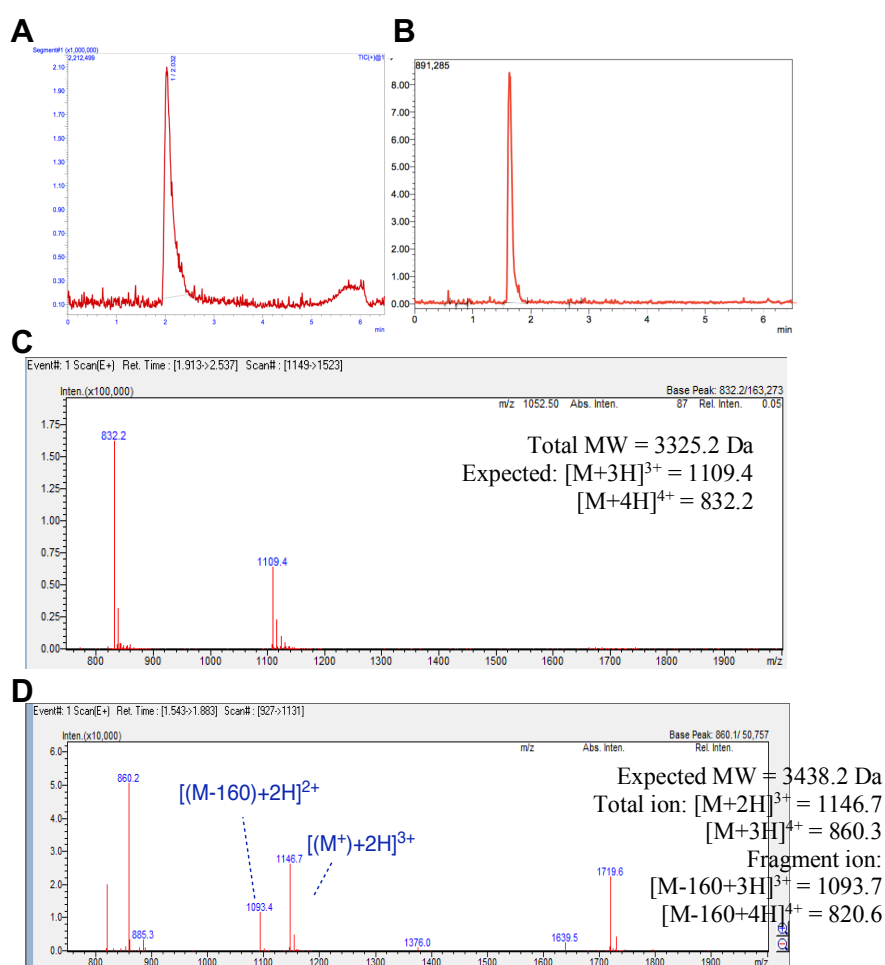

**Figure S12.** (A) Mass trace of parent Aviptadil•OAc. (B) Mass trace of the crude mixture between Aviptadil and **1b**. (C) Mass chromatogram of Aviptadil•OAc (positive ionization mode, TIC from T<sub>r</sub>=1.91-2.54 min.) (D) Mass chromatogram of the crude reaction to form **5** (positive ionization mode, TIC from T<sub>r</sub>=1.81-2.88 min.)

## Large Scale Synthesis of **5**

A 2 mL vial equipped with a magnetic stirrer was charged with Aviptadil•OAc (~1.4 mg, ~0.4  $\mu\text{mol}$ ). To the vial was added thiourea (100 mM in  $\text{H}_2\text{O}$ , 160  $\mu\text{L}$ ), and  $\text{H}_2\text{O}$  (120  $\mu\text{L}$ ). To the solution was added TEMPO (67 mM in  $\text{H}_2\text{O}$ , 120  $\mu\text{L}$ ) and the vial was stirred vigorously. To the stirring solution was added **1b** (100 mM in  $\text{H}_2\text{O}$  400  $\mu\text{L}$ ) and the resulting solution stirred for 5 minutes at room temperature. The resulting mixture was then extracted twice with 1:1 diethyl ether:ethyl acetate. The remaining organic volatiles were then removed from the aqueous layer using a rotary evaporator. Purification *via* reverse-phase HPLC\* (C18 column (150 x 10 mm, 10 $\mu\text{m}$ ), Gradient: 5-55% B over 9 min then 55-95% B over 1 min, hold for 1.5 min, then 95-5%B over 0.5 min, hold for 3 min, 5 ml/min), followed by lyophilization yielded **5** as a sticky, off-white solid that was immediately redissolved in  $\text{H}_2\text{O}$  (500  $\mu\text{L}$ ) and stored at  $-20^\circ\text{C}$ . Concentration analysis by  $A_{280}$  indicated a 1.3 mg/mL solution (>90% isolated yield). \*Note: Purification of **5** should be carried out expediently as prolonged purification times can lead to low levels of peptide backbone hydrolysis.

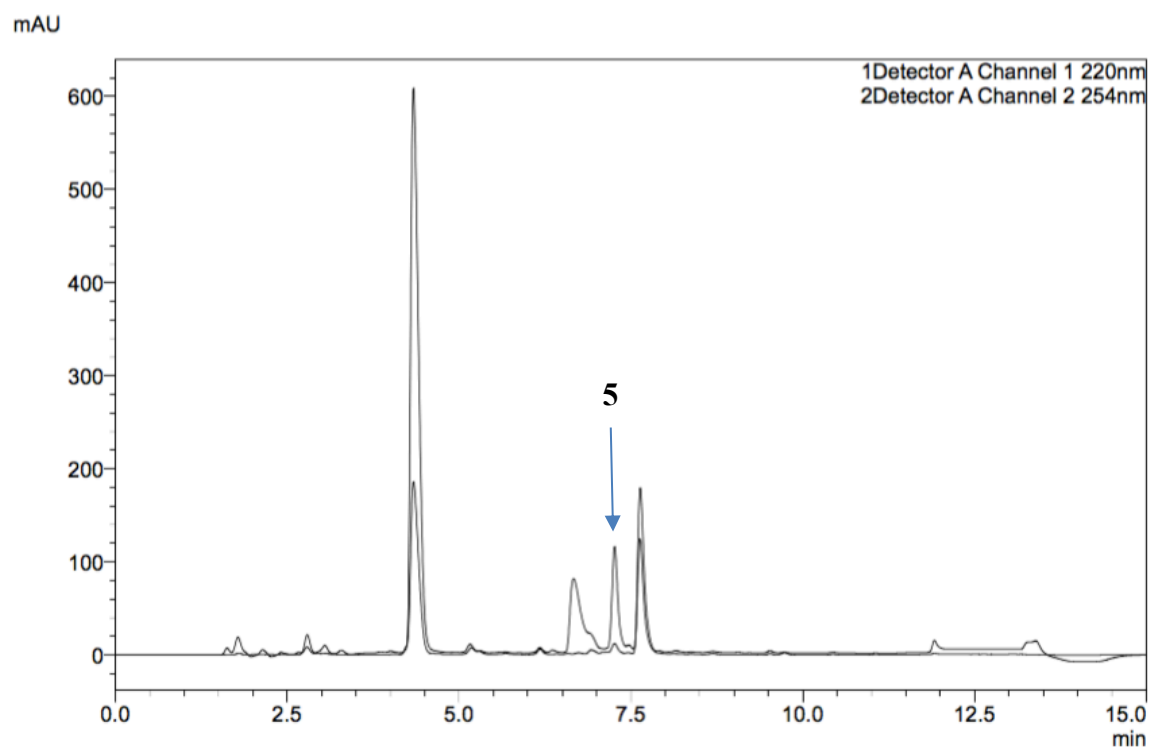

**Figure S13. (A)** HPLC trace of the crude reaction mixture of aviptadil•OAc and **1b**.

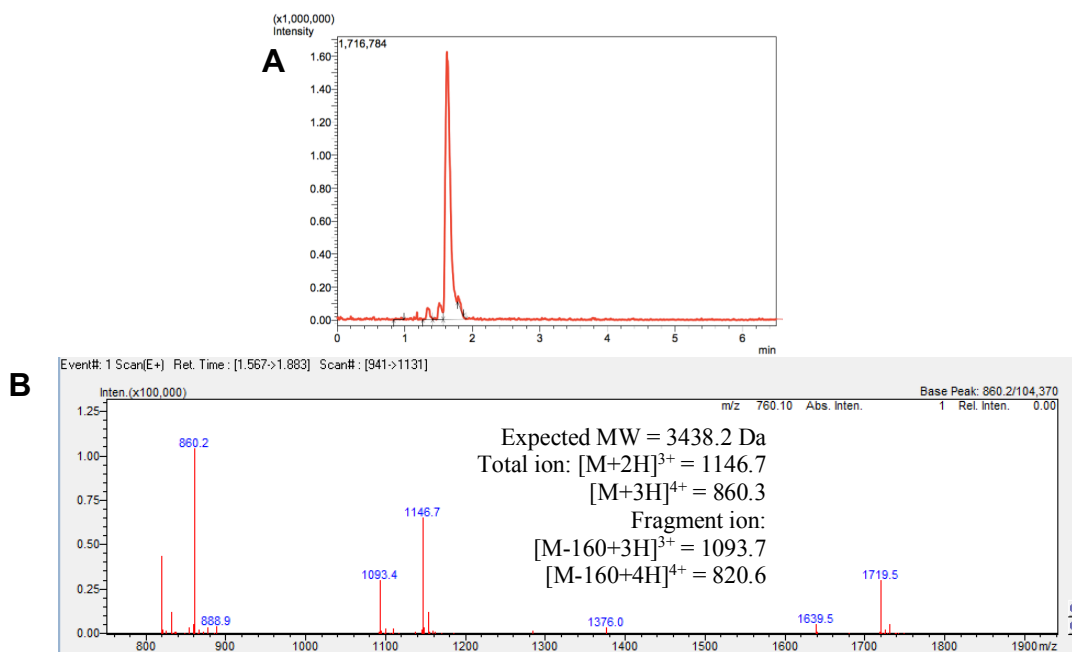

**Figure S14. (A)** Mass trace of purified **5**. **(B)** Mass spectrum of purified **5**.

### MSMS Analysis of Aviptadil conjugate **5**

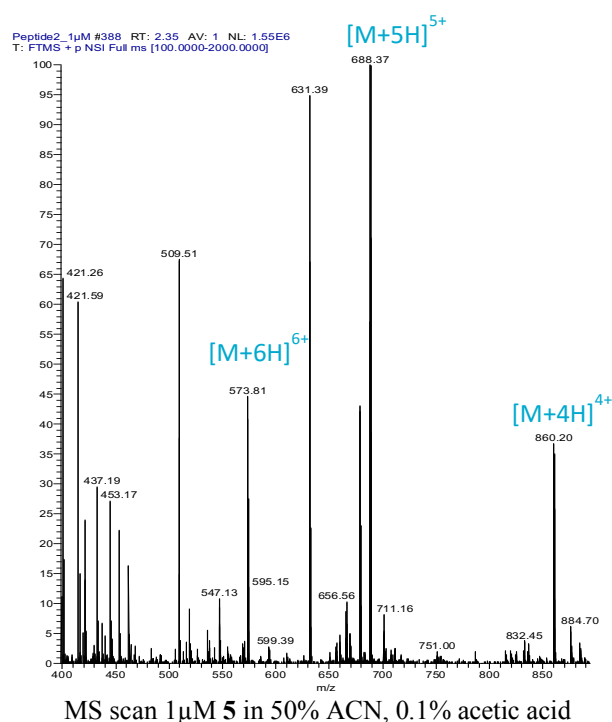

**Figure S15: MS Scan of Aviptadil conjugate **5****





### CD Spectrum of Aviptadil conjugate 5

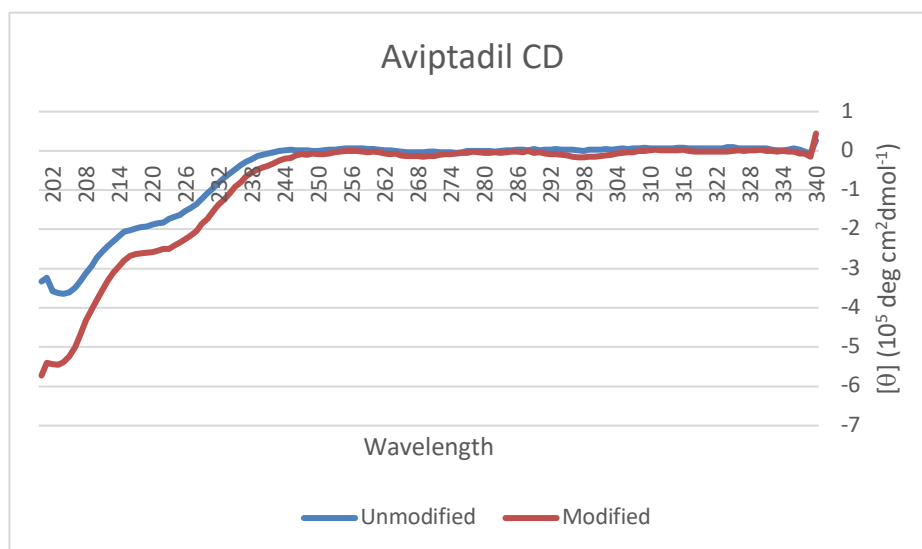

**Figure S17.** CD spectra of **5** (50  $\mu\text{M}$ ) in 5 mM pH 7.4 phosphate buffer, and Aviptadil (25  $\mu\text{M}$ ) in 5 mM pH 7.4 phosphate buffer.

## Functionalization of Tetracosactide•OAc with **1b** to form **6**.

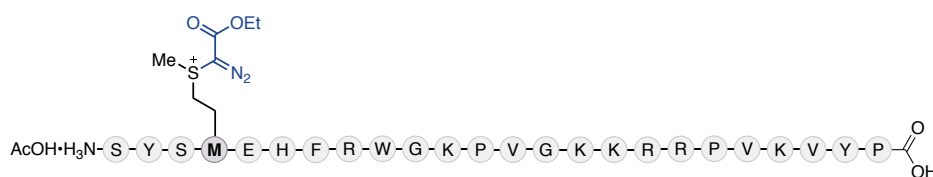

The labeling of tetracosactide was performed according to general procedure B using **1b** (100 mM in CH<sub>3</sub>CN) and 1:1 diethyl ether:ethyl acetate in the extraction step. The resulting solution was then analyzed directly *via* LC/ESI-MS (Pentafluorophenyl column (50 x 2.1 mm, 2.6 $\mu$ m), Gradient: 5-95% B over 5 min then hold for 0.5 min, 0.7 ml/min), and was judged to have proceeded in >95% conversion (**Figure S18**).

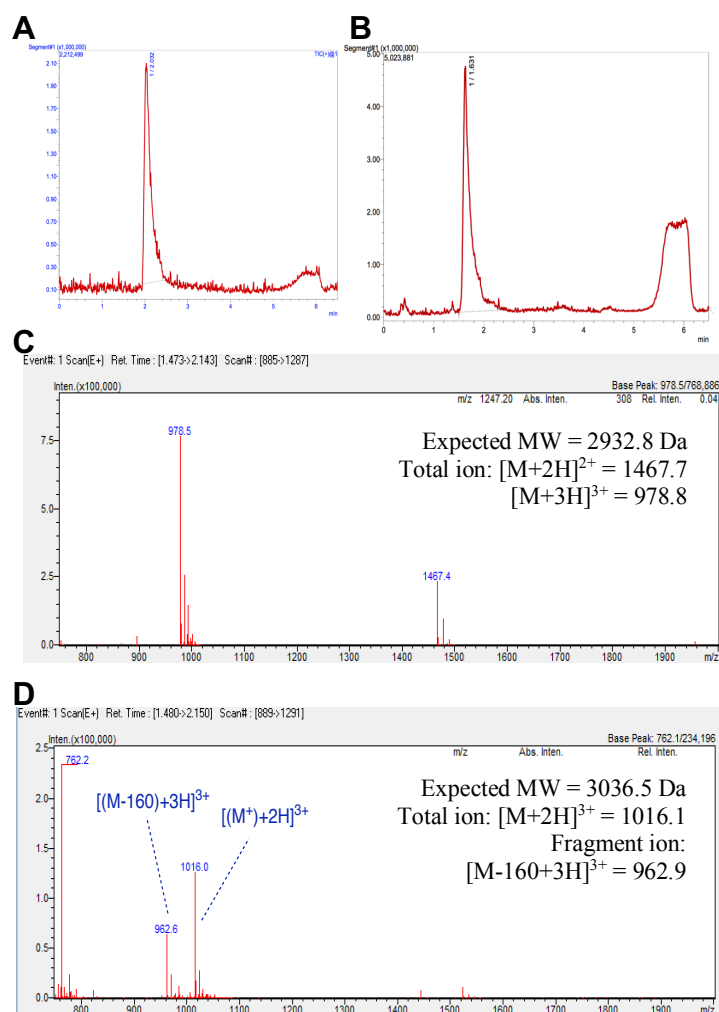

**Figure S18.** (A) Mass trace of parent Tetracosactide•OAc. (B) Mass trace of the crude mixture between Tetracosactide and **1b**. (C) Mass chromatogram of Tetracosactide•OAc (positive ionization mode, TIC from  $T_r=1.47$ -2.14 min.) (D) Mass chromatogram of the crude reaction to form **6** (positive ionization mode, TIC from  $T_r=1.48$ -2.15 min.)

**Functionalization of Tetracosactide•OAc with 1b to form 6 in completely aqueous conditions.**

The labeling of tetracosactide was performed according to general procedure B using **1b** (100 mM in H<sub>2</sub>O) and 1:1 diethyl ether:ethyl acetate in the extraction step. The resulting solution was then analyzed directly *via* LC/ESI-MS (C18 column (50 x 2.1 mm, 2.6 $\mu$ m), Gradient: 5-95% B over 5 min then hold for 0.5 min, 0.7 ml/min), and was judged to have proceeded in >95% conversion (**Figure S19**).

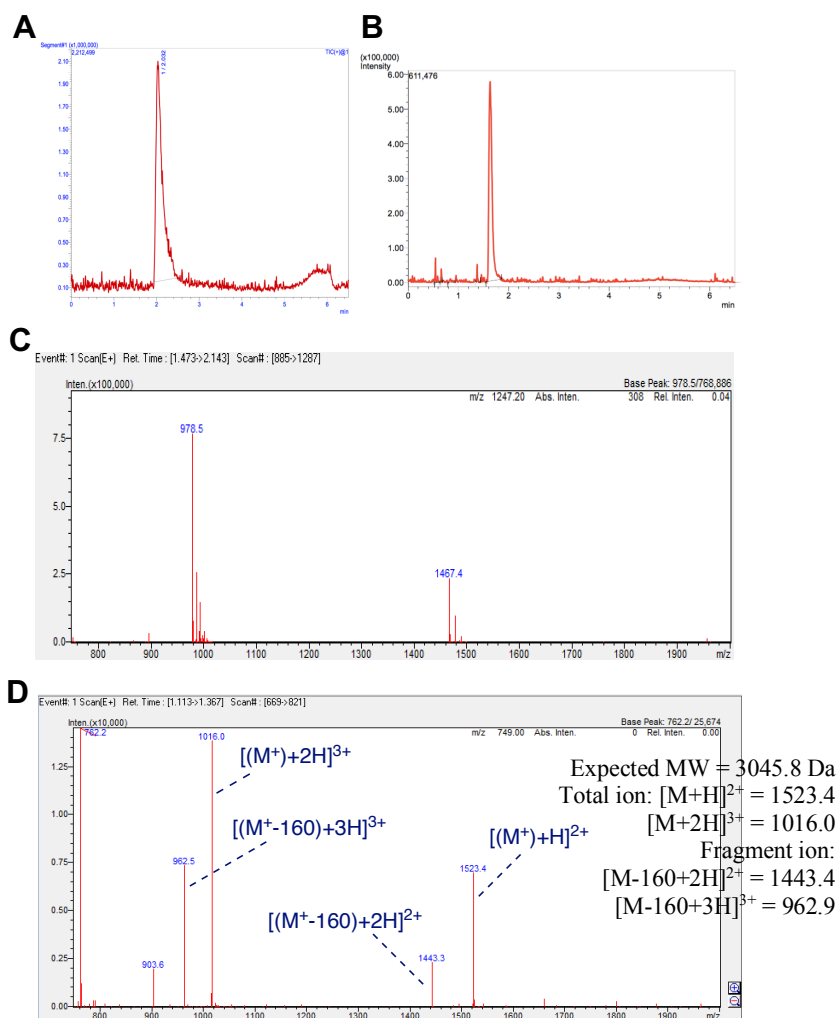

**Figure S19.** (A) Mass trace of parent Tetracosactide•OAc. (B) Mass trace of the crude mixture between Tetracosactide and **1b**. (C) Mass chromatogram of Tetracosactide•OAc (positive ionization mode, TIC from  $T_r=1.47$ - $2.14$  min.) (D) Mass chromatogram of the crude reaction to form **6** (positive ionization mode, TIC from  $T_r=1.11$ - $1.37$  min.)

## Large Scale Synthesis of **6**

A 2 mL vial equipped with a magnetic stirrer was charged with Tetracosactide•OAc (~1.8 mg, ~0.6  $\mu\text{mol}$ ). To the vial was added thiourea (100 mM in  $\text{H}_2\text{O}$ , 160  $\mu\text{L}$ ), and  $\text{H}_2\text{O}$  (120  $\mu\text{L}$ ). To the solution was added TEMPO (67 mM in  $\text{H}_2\text{O}$ , 120  $\mu\text{L}$ ) and the vial was stirred vigorously. To the stirring solution was added **1b** (100 mM in  $\text{H}_2\text{O}$ , 400  $\mu\text{L}$ ) and the resulting solution stirred for 5 minutes at room temperature. The resulting mixture was then extracted twice with 1:1 diethyl ether:ethyl acetate. The remaining organic volatiles were then removed from the aqueous layer using a rotary evaporator. Purification *via* reverse-phase HPLC\* (C18 column (150 x 10 mm, 10 $\mu\text{m}$ ), Gradient: 5-55% B over 9 min then 55-95% B over 1 min, hold for 1.5 min, then 95-5%B over 0.5 min, hold for 3 min, 5 ml/min), followed by lyophilization yielded **6** as a sticky, off-white solid that was immediately redissolved in  $\text{H}_2\text{O}$  (500  $\mu\text{L}$ ) and stored at  $-20^\circ\text{C}$ . Concentration analysis by  $A_{280}$  indicated a 1.0 mg/mL solution ~56% isolated yield). \*Note: Purification of **6** should be carried out expediently as prolonged purification times can lead to low levels of peptide backbone hydrolysis.

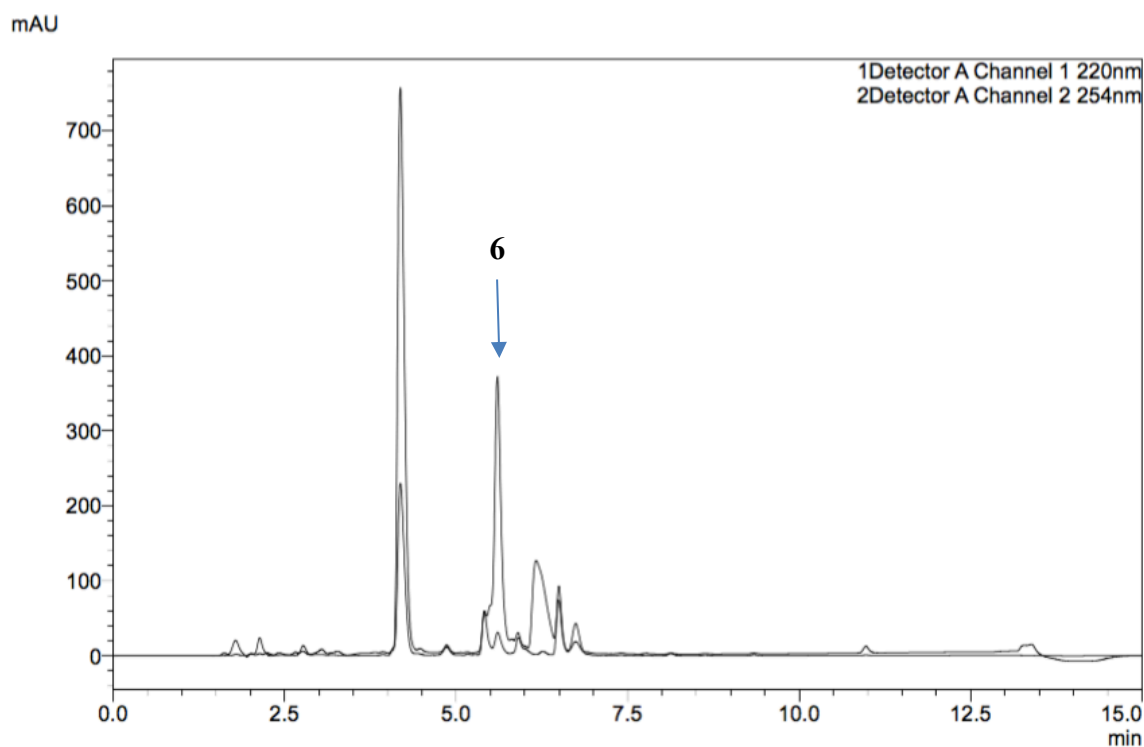

**Figure S20.** (A) HPLC trace of the crude reaction mixture of tetracosactide•OAc and **1b**

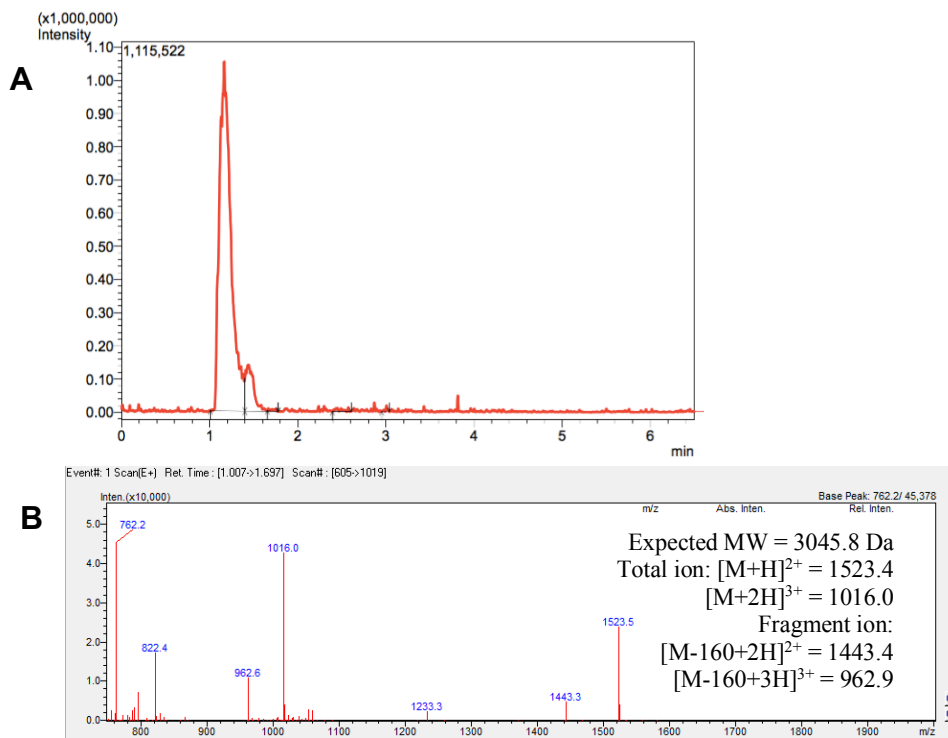

**Figure S21.** (A) Mass trace of purified **6**. (B) Mass spectrum of purified **6**.

### MSMS Analysis of Tetracosactide **6**

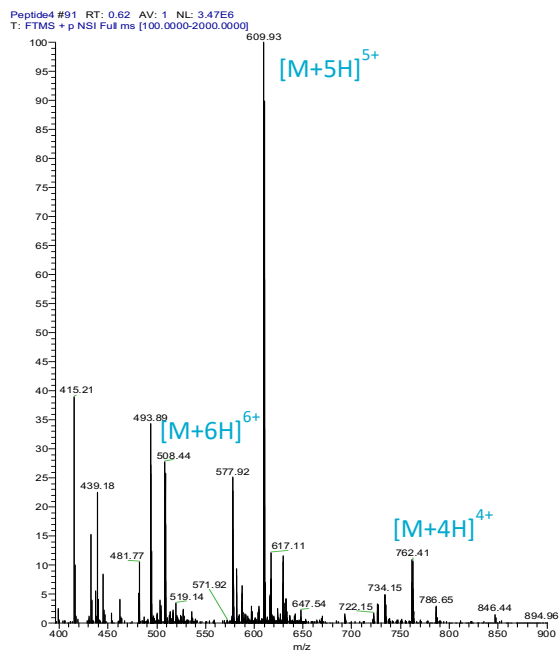

MS scan  $1\mu\text{M}$  **6** in 50% ACN, 0.1% acetic

**Figure S22:** MS Scan of Tetracosactide conjugate **6**

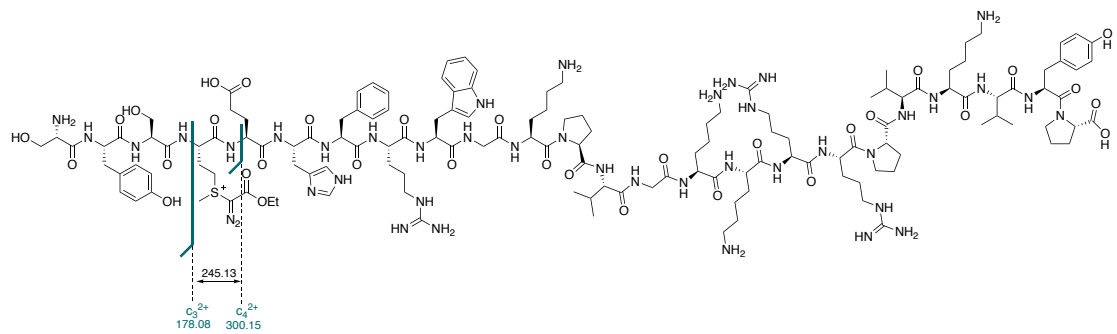

Sequence: SYSMEHFRWGKPVGKRRPVKVYP

| b+              | b2+              | b3+             | c+               | c2+              | c3+             | #  | Seq | #  | y+               | y2+              | y3+             | z+               | z2+              | z3+             |
|-----------------|------------------|-----------------|------------------|------------------|-----------------|----|-----|----|------------------|------------------|-----------------|------------------|------------------|-----------------|
| 88.0393         | 44.5233          | 30.0180         | 105.0659         | 53.0366          | 35.6935         | 1  | S   | 24 |                  |                  |                 |                  |                  |                 |
| <b>251.1026</b> | 126.0550         | 84.3724         | 268.1292         | 134.5682         | 90.0479         | 2  | Y   | 23 | 2958.6508        | <b>1479.8290</b> | 986.8884        | 2942.6321        | 1471.8197        | 981.5489        |
| 338.1347        | 169.5710         | 113.3831        | 355.1612         | <b>178.0842</b>  | 119.0586        | 3  | S   | 22 | 2795.5875        | 1398.2974        | 932.5340        | 2779.5687        | 1390.2880        | 927.1944        |
| 582.2700        | 291.6387         | 194.7615        | 599.2966         | <b>300.1519</b>  | 200.4370        | 4  | M   | 21 | 2708.5554        | 1354.7814        | 903.5233        | 2692.5367        | 1346.7720        | <b>898.1838</b> |
| 711.3126        | 356.1600         | 237.7757        | 728.3392         | 364.6732         | 243.4512        | 5  | E   | 20 | 2464.4200        | 1232.7137        | <b>822.1449</b> | 2448.4013        | <b>1224.7043</b> | 816.8053        |
| 848.3716        | 424.6894         | 283.4620        | 865.3981         | 433.2027         | 289.1376        | 6  | H   | 19 | 2335.3775        | 1168.1924        | <b>779.1307</b> | 2319.3587        | 1160.1830        | 773.7911        |
| <b>995.4400</b> | 498.2236         | 332.4848        | 1012.4665        | 506.7369         | 338.1604        | 7  | F   | 18 | 2198.3185        | 1099.6629        | <b>733.4444</b> | 2182.2998        | 1091.6535        | 728.1048        |
| 1151.5411       | 576.2742         | 384.5185        | 1168.5676        | <b>584.7875</b>  | 390.1941        | 8  | R   | 17 | 2051.2501        | 1026.1287        | <b>684.4216</b> | 2035.2314        | <b>1018.1193</b> | <b>679.0820</b> |
| 1337.6204       | 669.3138         | 446.5450        | 1354.6469        | 677.8271         | 452.2205        | 9  | W   | 16 | 1895.1490        | <b>948.0781</b>  | 632.3879        | 1879.1303        | 940.0688         | 627.0483        |
| 1394.6419       | <b>697.8246</b>  | 465.5521        | 1411.6684        | 706.3378         | 471.2277        | 10 | G   | 15 | 1709.0697        | <b>855.0385</b>  | 570.3614        | 1693.0510        | <b>847.0291</b>  | 565.0218        |
| 1522.7368       | 761.8720         | 508.2505        | 1539.7634        | 770.3853         | 513.9260        | 11 | K   | 14 | 1652.0482        | 826.5278         | 551.3543        | <b>1636.0295</b> | 818.5184         | 546.0147        |
| 1619.7896       | <b>810.3984</b>  | 540.6014        | <b>1636.8161</b> | 818.9117         | 546.2769        | 12 | P   | 13 | <b>1523.9533</b> | <b>762.4803</b>  | <b>508.6559</b> | 1507.9346        | 754.4709         | 503.3164        |
| 1718.8580       | <b>859.9326</b>  | 573.6242        | 1735.8845        | 868.4459         | 579.2997        | 13 | V   | 12 | 1426.9005        | 713.9539         | 476.3050        | 1410.8818        | 705.9445         | 470.9654        |
| 1775.8795       | 888.4434         | 592.6313        | 1792.9060        | 896.9566         | 598.3069        | 14 | G   | 11 | 1327.8321        | <b>664.4197</b>  | 443.2822        | <b>1311.8134</b> | 656.4103         | 437.9426        |
| 1903.9744       | 952.4908         | 635.3297        | 1921.0010        | 961.0041         | <b>641.0052</b> | 15 | K   | 10 | <b>1270.8106</b> | 635.9090         | 424.2751        | 1254.7919        | 627.8996         | 418.9355        |
| 2032.0694       | 1016.5383        | <b>678.0280</b> | 2049.0959        | 1025.0516        | <b>683.7035</b> | 16 | K   | 9  | <b>1142.7157</b> | 571.8615         | 381.5767        | <b>1126.6969</b> | 563.8521         | 376.2372        |
| 2188.1705       | 1094.5889        | 730.0617        | 2205.1970        | <b>1103.1022</b> | <b>735.7372</b> | 17 | R   | 8  | 1014.6207        | 507.8140         | 338.8784        | <b>998.6020</b>  | 499.8046         | 333.5388        |
| 2344.2716       | 1172.6394        | 782.0954        | 2361.2982        | 1181.1527        | <b>787.7709</b> | 18 | R   | 7  | 858.5196         | 429.7634         | 286.8447        | 842.5009         | 421.7541         | 281.5051        |
| 2441.3244       | 1221.1658        | 814.4463        | 2458.3509        | 1229.6791        | 820.1218        | 19 | P   | 6  | 702.4185         | 351.7129         | 234.8110        | 686.3998         | 343.7035         | 229.4714        |
| 2540.3928       | <b>1270.7000</b> | 847.4691        | 2557.4193        | <b>1279.2133</b> | 853.1446        | 20 | V   | 5  | 605.3657         | 303.1865         | 202.4601        | 589.3470         | 295.1771         | 197.1205        |
| 2668.4877       | 1334.7475        | 890.1674        | 2685.5143        | 1343.2608        | 895.8429        | 21 | K   | 4  | 506.2973         | 253.6523         | 169.4373        | 490.2786         | 245.6429         | 164.0977        |
| 2767.5562       | 1384.2817        | 923.1902        | 2784.5827        | 1392.7950        | 928.8658        | 22 | V   | 3  | 378.2023         | 189.6048         | 126.7390        | 362.1836         | 181.5954         | 121.3994        |
| 2930.6195       | <b>1465.8134</b> | <b>977.5447</b> | 2947.6460        | 1474.3267        | 983.2202        | 23 | Y   | 2  | <b>279.1339</b>  | 140.0706         | 93.7162         | 263.1152         | 132.0612         | 88.3766         |
|                 |                  |                 |                  |                  |                 | 24 | P   | 1  | <b>116.0706</b>  | 58.5389          | 39.3617         | 100.0519         | 50.5296          | 34.0221         |

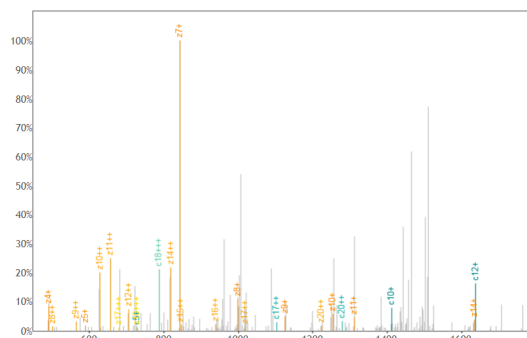

ETD fragmentation spectrum c and z ions

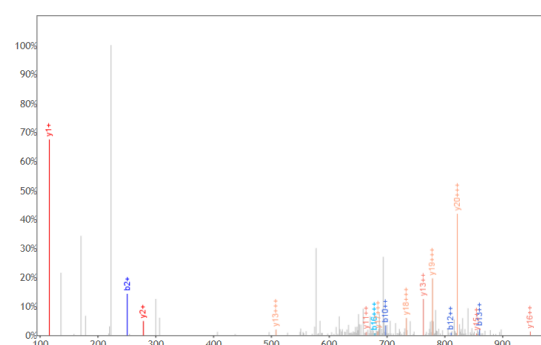

HCD fragmentation spectrum b and y ions

**Figure S23:** MSMS spectra of tetraacosactide conjugate **6** with the difference between  $c_3^{2+}$  and  $c_4^{2+}$  ions of 245.13 Da confirming the presence of the modification on the methionine residue.

## CD Spectrum of Tetracosactide 6

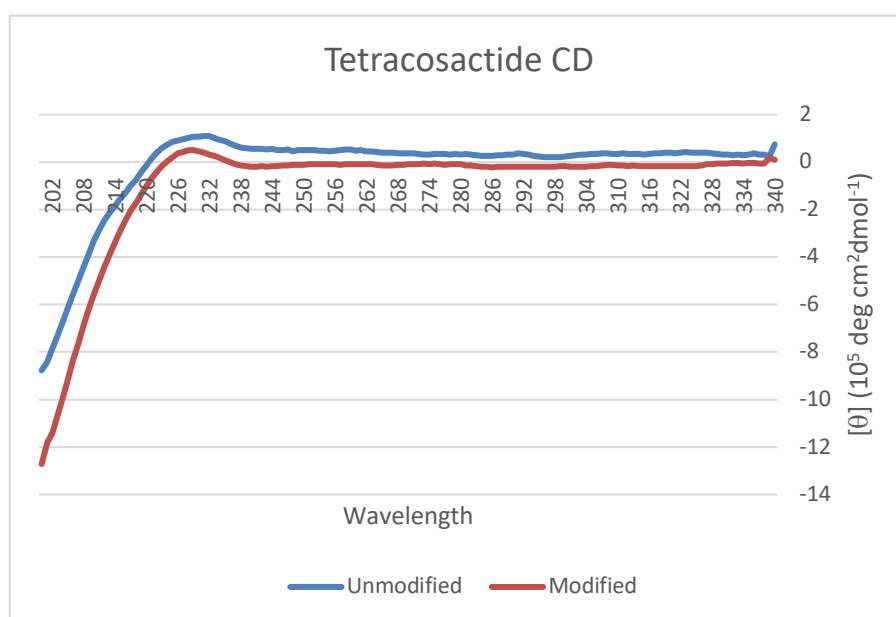

**Figure S24.** CD spectra of **6** (50  $\mu\text{M}$ ) in 5 mM pH 7.4 phosphate buffer, and Tetracosactide (25  $\mu\text{M}$ ) in 5 mM pH 7.4 phosphate buffer



## Functionalization of GTP-binding protein fragment G- $\alpha$ with **1b** to form **7**.

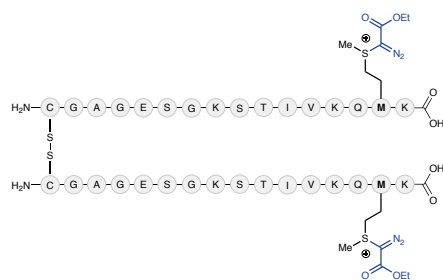

A 2 mL vial equipped with a magnetic stirrer was charged with a solution containing the GTP-binding protein fragment G- $\alpha$  (3 mM in H<sub>2</sub>O, 20  $\mu$ L). To the vial was added thiourea (100 mM in H<sub>2</sub>O, 40  $\mu$ L), formic acid (2 M, 10  $\mu$ L), and H<sub>2</sub>O (30  $\mu$ L). The resulting solution was stirred vigorously. To the stirring solution was added **1b** (100 mM in H<sub>2</sub>O, 100  $\mu$ L) and the resulting solution stirred for 5 minutes. The resulting mixture was then extracted twice with diethyl ether. The remaining organic volatiles were then removed from the aqueous layer using a rotary evaporator. The resulting solution was then analyzed directly *via* LC/MS (Pentafluorophenyl column (50 x 2.1 mm, 2.6 $\mu$ m), Gradient: 5-95% B over 5 min then hold for 0.5 min, 0.7 ml/min), and was judged to have proceeded in >95% conversion with an estimated 96% formation of **7** and 4% formation GTP-binding protein fragment+2 labels+2 oxygens (>19:1 ratio) (Figure S25).

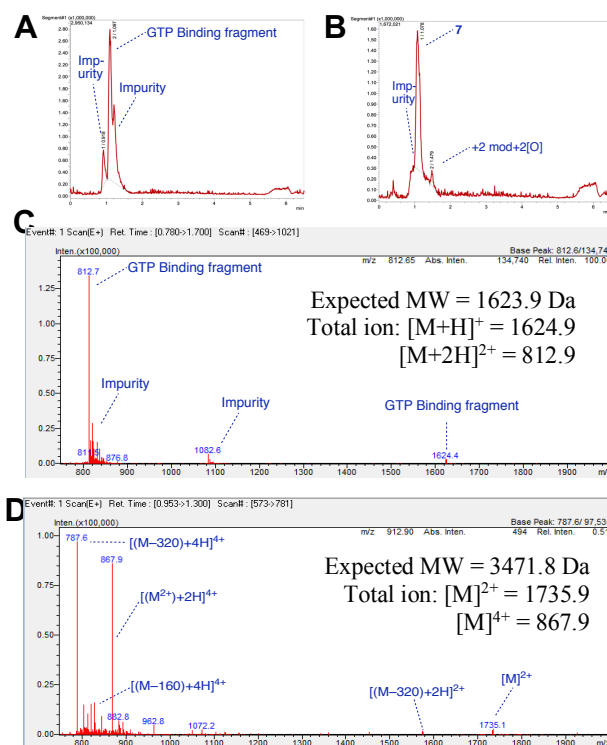

**Figure S25.** (A) Mass trace of parent GTP-binding protein fragment G- $\alpha$ . (B) Mass trace of the crude mixture between GTP-binding protein fragment G- $\alpha$  and **1b**. (C) Mass chromatogram of GTP-binding protein fragment G- $\alpha$  (positive ionization mode, TIC from  $T_r=0.8-1.7$  min.) (D) Mass chromatogram of the crude reaction to form **7** (positive ionization mode, TIC from  $T_r=0.95-1.30$  min.)

## Functionalization of Teriparatide•OAc with **1b** to form **8** in completely aqueous conditions

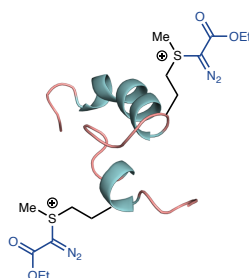

A 2 mL vial equipped with a magnetic stirrer was charged with a solution containing Teriparatide•OAc (1 mM in H<sub>2</sub>O, 20  $\mu$ L). To the vial was added thiourea (100 mM in H<sub>2</sub>O, 20  $\mu$ L). The vial was then quickly evacuated and refilled with N<sub>2</sub> 5 times. To the vial was added formic acid (100 mM, 10  $\mu$ L) and freshly sparged water (20  $\mu$ L). The vial was chilled in an ice bath. To the chilled solution was added TEMPO (33 mM in H<sub>2</sub>O, 30  $\mu$ L) and the vial was stirred vigorously. To the stirring solution was added **1b** (100 mM in H<sub>2</sub>O, 100  $\mu$ L) and the resulting solution stirred for 5 minutes at room temperature. The resulting mixture was then extracted twice with 1:1 diethyl ether/ethyl acetate. The remaining organic volatiles were then removed from the aqueous layer using a rotary evaporator. The resulting solution was then analyzed directly *via* LC/MS (C18 column (50 x 2.1 mm, 2.6 $\mu$ m), Gradient: 5-95% B over 5 min then hold for 0.5 min, 0.7 ml/min), and was judged to have proceeded in >95% conversion (**Figure S27**).

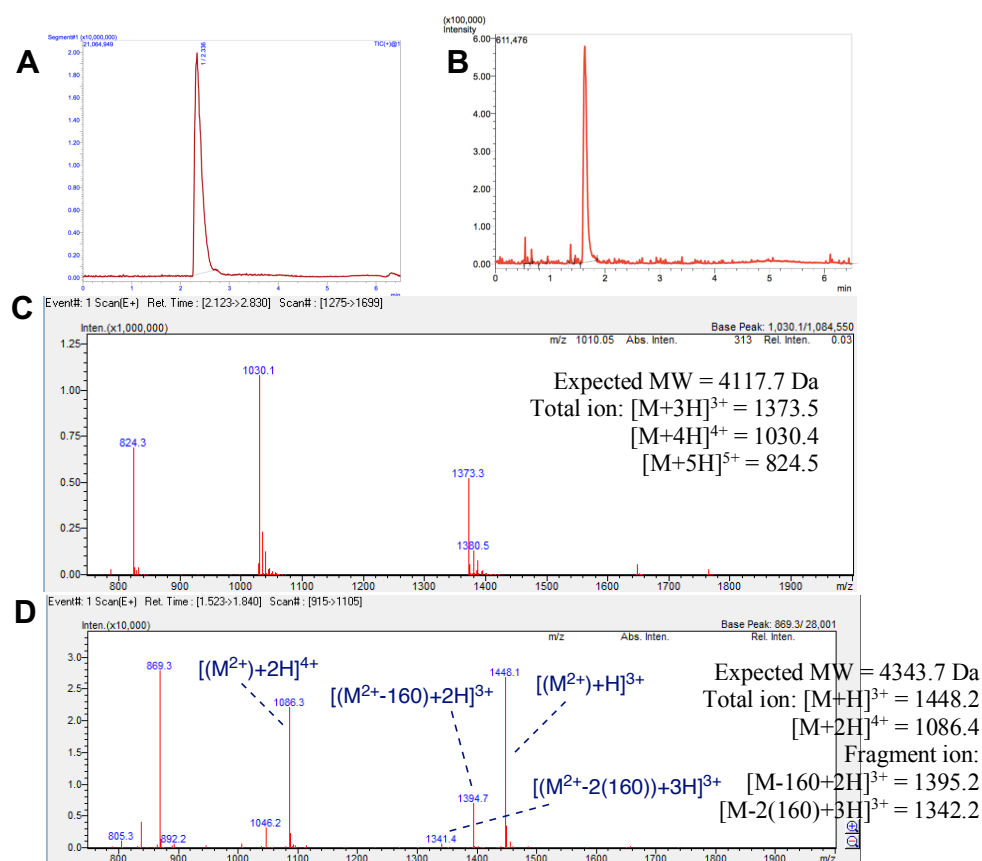

**Figure S27.** (A) Mass trace of parent Teriparatide•OAc. (B) Mass trace of the crude mixture between Teriparatide and **1b**. (C) Mass chromatogram of Teriparatide•OAc

(positive ionization mode, TIC from  $T_r=2.12-2.83$  min.) **(D)** Mass chromatogram of the crude reaction to form **8** (positive ionization mode, TIC from  $T_r=1.52-1.84$  min.)

### Large Scale Synthesis of **8**

A 2 mL vial equipped with a magnetic stirrer was charged with Teriparatide•OAc (~1.2 mg, ~0.3  $\mu\text{mol}$ ). To the vial was added thiourea (100 mM in  $\text{H}_2\text{O}$ , 160  $\mu\text{L}$ ), formic acid (0.1M in  $\text{H}_2\text{O}$ , 40  $\mu\text{L}$ ) and  $\text{H}_2\text{O}$  (80  $\mu\text{L}$ ). To the solution was added TEMPO (67 mM in  $\text{H}_2\text{O}$ , 120  $\mu\text{L}$ ) and the vial was stirred vigorously. To the stirring solution was added **1b** (100 mM in  $\text{H}_2\text{O}$ , 400  $\mu\text{L}$ ) and the resulting solution stirred for 5 minutes at room temperature. The resulting mixture was then extracted twice with 1:1 diethyl ether:ethyl acetate. The remaining organic volatiles were then removed from the aqueous layer using a rotary evaporator. Purification *via* reverse-phase HPLC\* (C18 column (150 x 10 mm, 10 $\mu\text{m}$ ), Gradient: 5-55% B over 9 min then 55-95% B over 1 min, hold for 1.5 min, then 95-5%B over 0.5 min, hold for 3 min, 5 ml/min), followed by lyophilization yielded **8** as a sticky, off-white solid that was immediately redissolved in  $\text{H}_2\text{O}$  (500  $\mu\text{L}$ ) and stored at  $-20^\circ\text{C}$ . Concentration analysis by  $A_{280}$  indicated a 1.0 mg/mL solution (~92% isolated yield). \*Note: Purification of **8** should be carried out expediently as prolonged purification times can lead to low levels of peptide backbone hydrolysis.

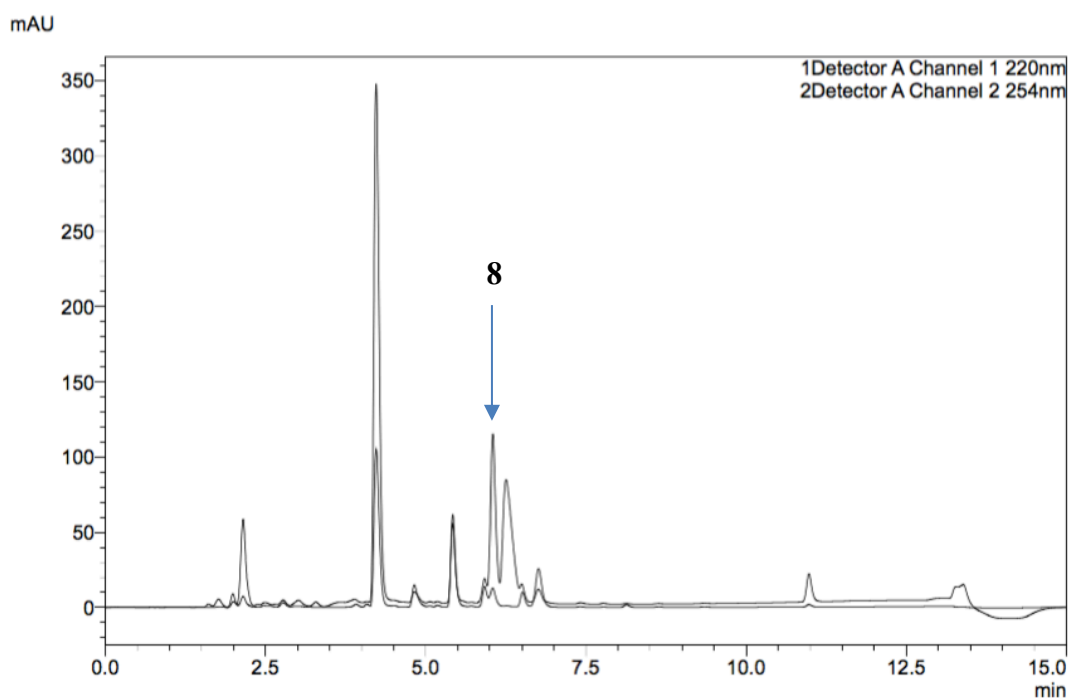

**Figure S28.** (A) HPLC trace of the crude reaction mixture of teriparatide•OAc and **1b**

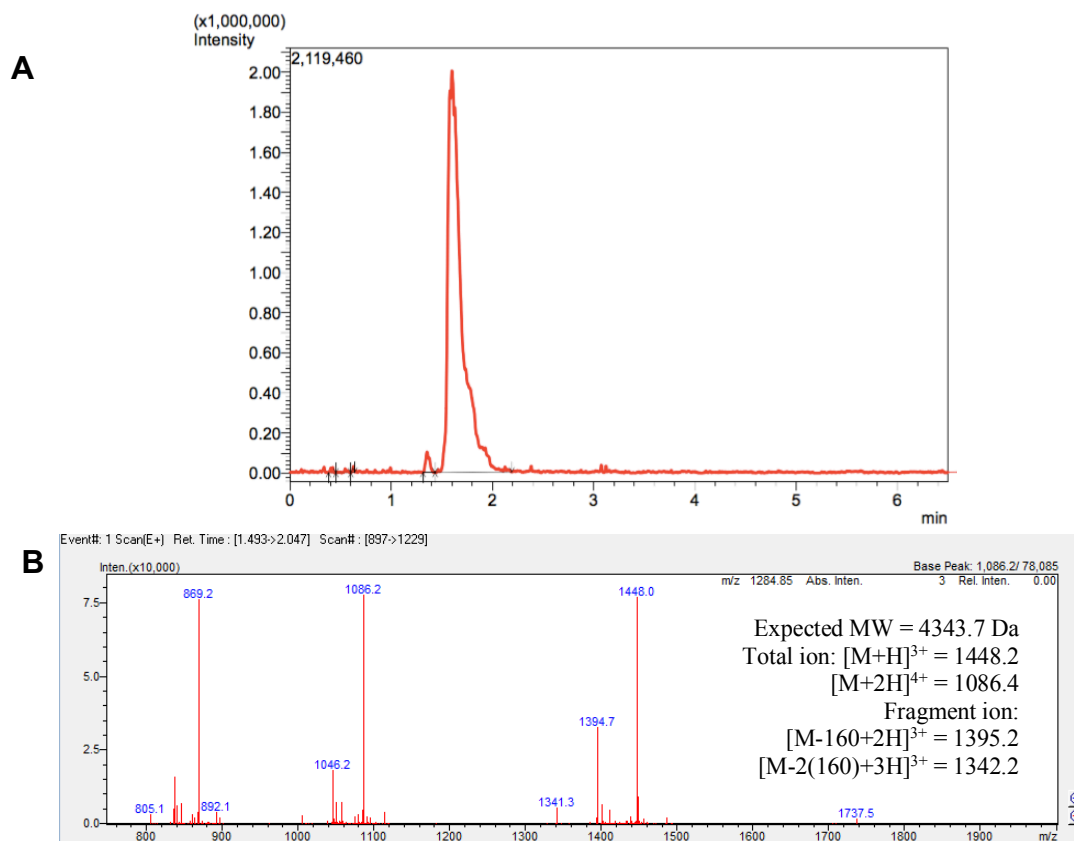

**Figure S29. (A)** Mass trace of purified **8**. **(B)** Mass spectrum of purified **8**.

## MSMS Analysis of Teriparatide conjugate 8

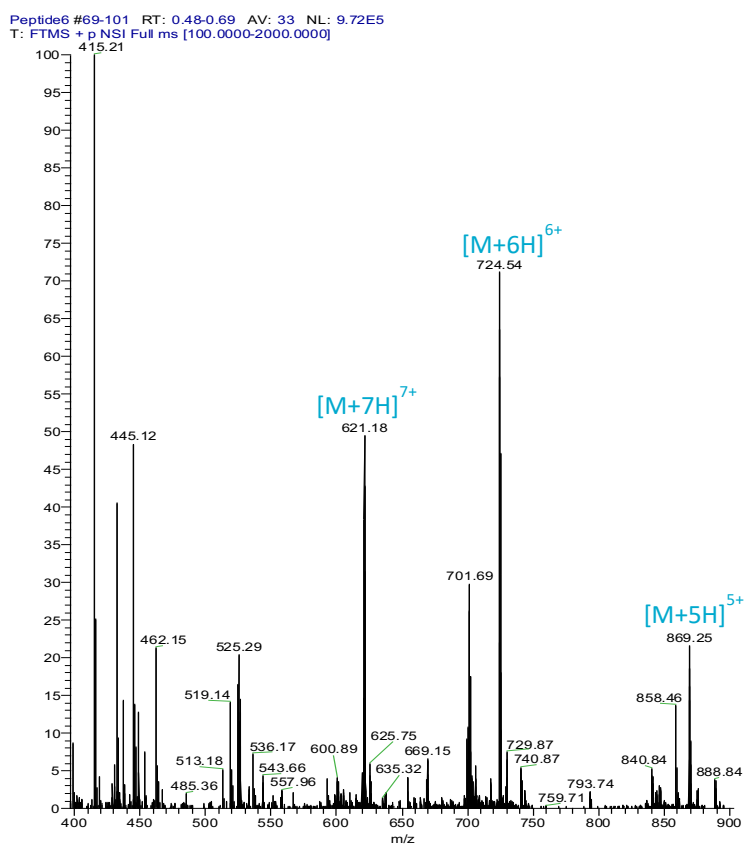

**Figure S30:** MS Scan of Teriparatide conjugate 8

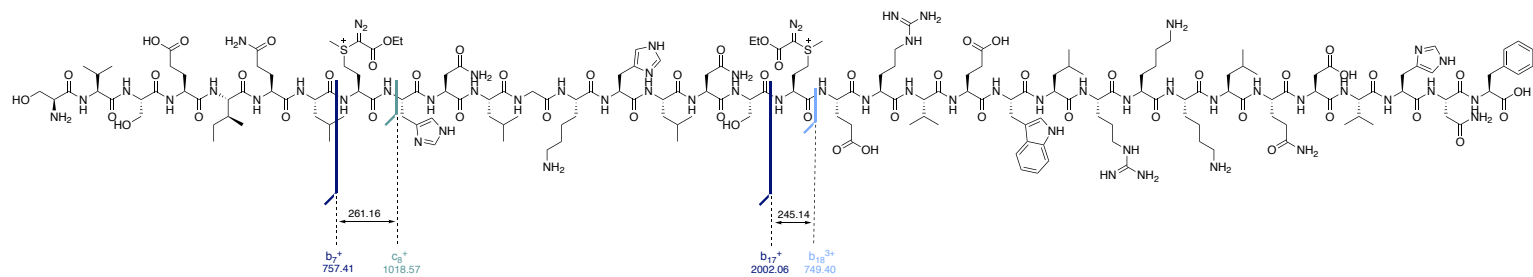

Sequence: **SVSEIQLM**M**HN**L**GKHLNSM**ER**VEWLR**KK**L**EDVH**N**F

| b+               | b2+              | b3+             | c+               | c2+              | c3+              | #  | Seq | #  | y+               | y2+             | y3+             | z+               | z2+              | z3+             |
|------------------|------------------|-----------------|------------------|------------------|------------------|----|-----|----|------------------|-----------------|-----------------|------------------|------------------|-----------------|
| 88.0393          | 44.5233          | 30.0180         | 105.0659         | 53.0366          | 35.6935          | 1  | S   | 34 |                  |                 |                 |                  |                  |                 |
| <b>187.1077</b>  | 94.0575          | 63.0408         | 204.1343         | 102.5708         | 68.7163          | 2  | V   | 33 | 4256.2800        | 2128.6436       | 1419.4315       | 4240.2613        | 2120.6343        | 1414.0919       |
| 274.1397         | 137.5735         | 92.0514         | 291.1663         | 146.0868         | 97.7269          | 3  | S   | 32 | 4157.2116        | 2079.1094       | 1386.4087       | 4141.1929        | 2071.1001        | 1381.0691       |
| 403.1823         | 202.0948         | 135.0656        | 420.2089         | 210.6081         | 140.7411         | 4  | E   | 31 | 4070.1796        | 2035.5934       | 1357.3980       | 4054.1608        | 2027.5841        | 1352.0585       |
| <b>516.2664</b>  | 258.6368         | 172.7603        | 533.2930         | 267.1501         | 178.4358         | 5  | I   | 30 | 3941.1370        | 1971.0721       | 1314.3838       | 3925.1182        | 1963.0628        | 1309.0443       |
| 644.3250         | 322.6661         | 215.4465        | 661.3515         | 331.1794         | 221.1220         | 6  | Q   | 29 | 3828.0529        | 1914.5301       | 1276.6892       | 3812.0342        | 1906.5207        | 1271.3496       |
| <b>757.4090</b>  | 379.2082         | 253.1412        | 774.4356         | 387.7214         | 258.8167         | 7  | L   | 28 | 3699.9943        | 1850.5008       | 1234.0030       | 3683.9756        | 1842.4914        | 1228.6634       |
| 1001.5444        | 501.2759         | 334.5197        | 1018.5710        | 509.7891         | 340.1952         | 8  | M   | 27 | 3586.9103        | 1793.9588       | 1196.2083       | 3570.8915        | 1785.9494        | 1190.9687       |
| 1138.6033        | 569.8053         | 380.2060        | 1155.6299        | 578.3186         | 385.8815         | 9  | H   | 26 | 3342.7749        | 1671.8911       | 1114.9298       | 3326.7562        | 1663.8817        | 1109.5902       |
| <b>1252.6463</b> | 626.8268         | 418.2203        | <b>1269.6728</b> | 635.3400         | 423.8958         | 10 | N   | 25 | 3205.7160        | 1603.3616       | 1069.2435       | 3189.6972        | 1595.3523        | 1063.9039       |
| 1365.7303        | 683.3688         | 455.9150        | 1382.7569        | 691.8821         | 461.5905         | 11 | L   | 24 | 3091.6730        | 1546.3402       | 1031.2292       | 3075.6543        | 1538.3308        | 1025.8896       |
| 1422.7518        | <b>711.8795</b>  | 474.9221        | 1439.7783        | 720.3928         | 480.5976         | 12 | G   | 23 | 2978.5890        | 1489.7981       | 993.5345        | 2962.5703        | 1481.7888        | 988.1949        |
| 1550.8468        | 775.9270         | 517.6204        | <b>1567.8733</b> | <b>784.4403</b>  | 523.2960         | 13 | K   | 22 | 2921.5675        | 1461.2874       | 974.5274        | 2905.5488        | 1453.2780        | 969.1878        |
| 1687.9057        | <b>844.4565</b>  | 563.3067        | 1704.9322        | 852.9697         | 568.9823         | 14 | H   | 21 | 2793.4725        | 1397.2399       | 931.8290        | 2777.4538        | 1389.2306        | <b>926.4895</b> |
| 1800.9897        | <b>900.9985</b>  | 601.0014        | 1818.0163        | 909.5118         | 606.6769         | 15 | L   | 20 | 2656.4136        | 1328.7105       | 886.1427        | 2640.3949        | <b>1320.7011</b> | 880.8032        |
| <b>1915.0327</b> | 958.0200         | 639.0157        | 1932.0592        | 966.5332         | 644.6913         | 16 | N   | 19 | 2543.3296        | 1272.1684       | <b>848.4480</b> | 2527.3109        | 1264.1591        | <b>843.1085</b> |
| <b>2002.0647</b> | 1001.5360        | 668.0264        | 2019.0912        | 1010.0493        | 673.7019         | 17 | S   | 18 | 2429.2866        | 1215.1470       | 810.4337        | 2413.2679        | 1207.1376        | 805.0942        |
| 2246.2001        | 1123.6037        | <b>749.4049</b> | 2263.2266        | 1132.1170        | 755.0804         | 18 | M   | 17 | 2342.2546        | 1171.6309       | 781.4231        | 2326.2359        | 1163.6216        | 776.0835        |
| 2375.2427        | 1188.1250        | <b>792.4191</b> | 2392.2692        | 1196.6382        | 798.0946         | 19 | E   | 16 | 2098.1192        | 1049.5633       | 700.0446        | 2082.1005        | 1041.5539        | 694.7050        |
| 2531.3438        | 1266.1755        | <b>844.4528</b> | 2548.3703        | 1274.6888        | 850.1283         | 20 | R   | 15 | <b>1969.0766</b> | 985.0420        | 657.0304        | <b>1953.0579</b> | 977.0326         | 651.6908        |
| 2630.4122        | 1315.7097        | <b>877.4756</b> | 2647.4387        | 1324.2230        | 883.1511         | 21 | V   | 14 | 1812.9755        | 906.9914        | 604.9967        | 1796.9568        | 898.9820         | 599.6571        |
| 2759.4548        | <b>1380.2310</b> | 920.4898        | 2776.4813        | <b>1388.7443</b> | 926.1653         | 22 | E   | 13 | 1713.9071        | <b>857.4572</b> | 571.9739        | <b>1697.8884</b> | 849.4478         | 566.6343        |
| 2945.5341        | 1473.2707        | 982.5162        | 2962.5607        | 1481.7840        | 988.1917         | 23 | W   | 12 | 1584.8645        | 792.9359        | 528.9597        | <b>1568.8458</b> | 784.9265         | 523.6201        |
| 3058.6182        | 1529.8127        | 1020.2109       | 3075.6447        | 1538.3260        | 1025.8864        | 24 | L   | 11 | 1398.7852        | 699.8962        | 466.9333        | 1382.7665        | 691.8869         | 461.5937        |
| 3214.7193        | 1607.8633        | 1072.2446       | 3231.7458        | 1616.3766        | 1077.9201        | 25 | R   | 10 | <b>1285.7011</b> | 643.3542        | 429.2386        | <b>1269.6824</b> | 635.2448         | 423.8990        |
| 3342.8142        | 1671.9108        | 1114.9429       | 3359.8408        | 1680.4240        | 1120.6184        | 26 | K   | 9  | 1129.6000        | 565.3037        | 377.2049        | 1113.5813        | 557.2943         | 371.8653        |
| 3470.9092        | 1735.9582        | 1157.6413       | 3487.9358        | 1744.4715        | 1163.3168        | 27 | K   | 8  | 1001.5051        | 501.2562        | 334.5065        | 985.4863         | 493.2468         | 329.1670        |
| 3583.9933        | 1792.5003        | 1195.3359       | 3601.0198        | 1801.0135        | 1201.0115        | 28 | L   | 7  | 873.4101         | 437.2087        | 291.8082        | <b>857.3914</b>  | 429.1993         | 286.4686        |
| 3713.0359        | 1857.0216        | 1238.3501       | 3730.0624        | 1865.5348        | 1244.0257        | 29 | E   | 6  | 760.3260         | 380.6667        | 254.1135        | <b>744.3073</b>  | 372.6573         | 248.7740        |
| 3828.0628        | 1914.5350        | 1276.6925       | 3845.0894        | 1923.0483        | 1282.3680        | 30 | D   | 5  | 631.2835         | 316.1454        | 211.0993        | 615.2647         | 308.1360         | 205.7598        |
| 3927.1312        | 1964.0692        | 1309.7153       | 3944.1578        | <b>1972.5825</b> | <b>1315.3908</b> | 31 | V   | 4  | <b>516.2565</b>  | 258.6319        | 172.7570        | 500.2378         | 250.6225         | 167.4174        |
| 4064.1901        | 2032.5987        | 1355.4016       | 4081.2167        | 2041.1120        | 1361.0771        | 32 | H   | 3  | <b>417.1881</b>  | 209.0977        | 139.7342        | 401.1694         | 201.0883         | 134.3946        |
| 4178.2331        | 2089.6202        | 1393.4159       | 4195.2596        | 2098.1334        | 1399.0914        | 33 | N   | 2  | <b>280.1292</b>  | 140.5682        | 94.0479         | 264.1105         | 132.5589         | 88.7083         |
|                  |                  |                 |                  |                  |                  | 34 | F   | 1  | 166.0863         | 83.5468         | 56.0336         | 150.0675         | 75.5374          | 50.6940         |

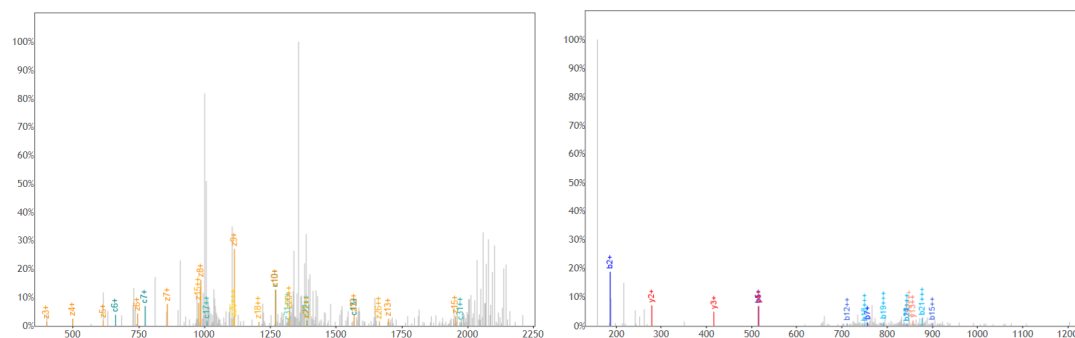

ETD fragmentation spectrum c and z ions

HCD fragmentation spectrum b and y ions

**Figure S31:** MSMS spectra of teriparatide conjugate **8** with the difference between  $b_7^+$  and  $c_8^+$  ions of 261.2 Da and difference between  $b_{17}^+$  and  $b_{18}^{3+}$  ions of 245.1 Da confirming the presence of the modification on the methionine residues.

### CD Spectrum of Teriparatide conjugate 8

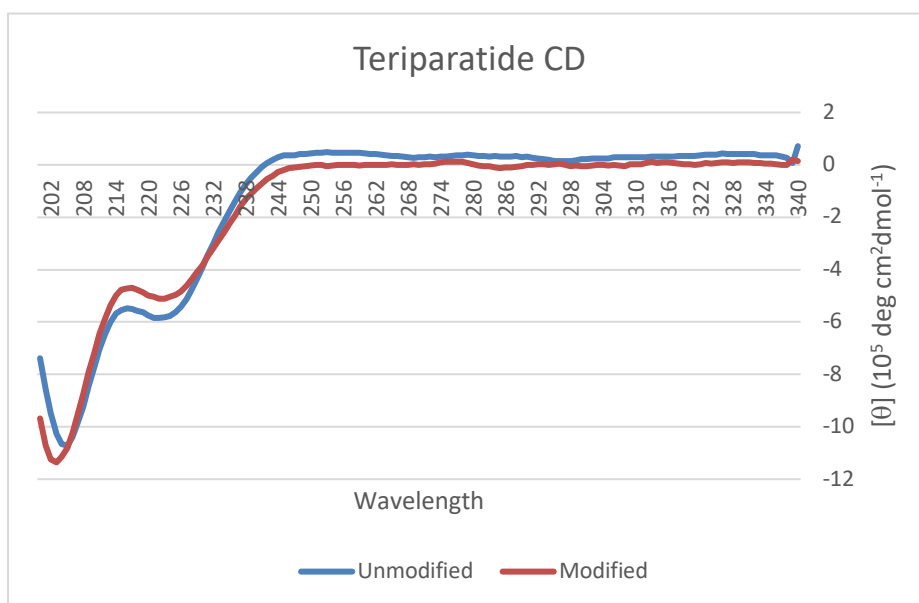

**Figure S32.** CD spectra of **8** (50  $\mu\text{M}$ ) in 5 mM pH 7.4 phosphate buffer, and Tetracosactide (25  $\mu\text{M}$ ) in 5 mM pH 7.4 phosphate buffer

*In contrast to the polypeptide sulfonium conjugates, MS/MS analysis was not possible with the protein sulfonium conjugates 9, 10 & 11, despite our best efforts. The presence of the sulfonium ion seems to interfere with both the digest and the MS/MS analysis in these larger systems, rendering the data uninterpretable. Efforts to understand the effect of the sulfonium ion are ongoing.*

### Functionalization of Lactalbumin with 1b to form 9.

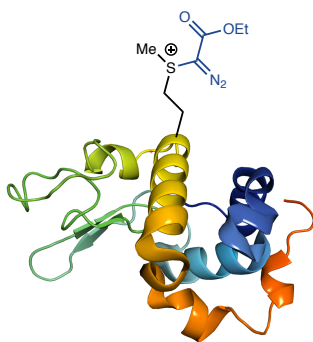

A 2 mL vial equipped with a magnetic stirrer was evacuated and refilled with N<sub>2</sub>. To the vial was added an N<sub>2</sub>-sparged solution containing Lactalbumin (350 μM in 0.1M thiourea (aq), 20 μL), an N<sub>2</sub>-sparged solution of thiourea (0.1M in H<sub>2</sub>O, 20μL), a solution of dilute HCl (100 mM, 20 μL) and N<sub>2</sub>-sparged H<sub>2</sub>O (30 μL). The vial was chilled in an ice bath. To the chilled solution was added an N<sub>2</sub>-sparged solution of TEMPO (100 mM in 1:1 H<sub>2</sub>O: CH<sub>3</sub>CN, 20 μL) and the vial was stirred vigorously. To the stirring solution was added the iodonium salt (100 mM in CH<sub>3</sub>CN, 100 μL) and the resulting solution stirred for 1 minute at 0° C. The resulting mixture was then extracted twice with 1:1 diethyl ether:ethyl acetate. The remaining organic volatiles were then removed from the aqueous layer using a rotary evaporator. The resulting solution was then analyzed directly *via* LC/MS, (C4 column, Gradient: 5-100% B over 5.2 min then hold for 1 min, then 100-5%B over 1 min, 0.2 ml/min), and was judged to have proceeded in 88% conversion with a >10:1 ratio of single:double modification (**Figure S33**).



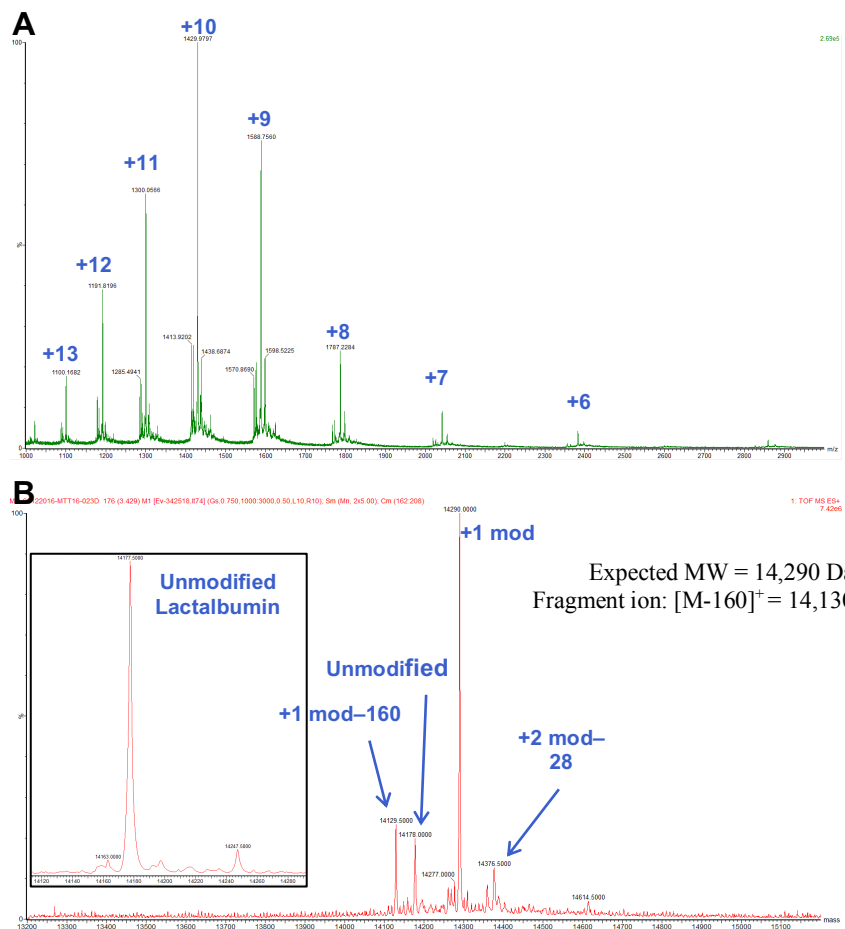

**Figure S33.** (A) Mass chromatogram of the crude reaction mixture between Lactalbumin and **1b** to form **9**. (B) Deconvoluted mass spectrum of the crude reaction to form **9**. The insert depicts the deconvoluted mass spectrum of unmodified Lactalbumin.

## Functionalization of Aprotinin with **1b** to form **10**.

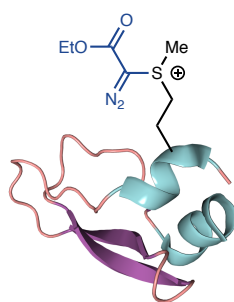

The labeling of Aprotinin was performed according to general procedure B using **1b** (100 mM in H<sub>2</sub>O) and 1:1 diethyl ether:ethyl acetate in the extraction step. The resulting solution was then analyzed directly *via* LC/MS (C4 column (C4 column, Gradient: 5-100% B over 5.2 min then hold for 1 min, then 100-5%B over 1 min, 0.2 ml/min), and was judged to have proceeded in >95% conversion, with a 3:1 ratio of **10**:aprotinin sulfoxide observed (**Figure S34**).

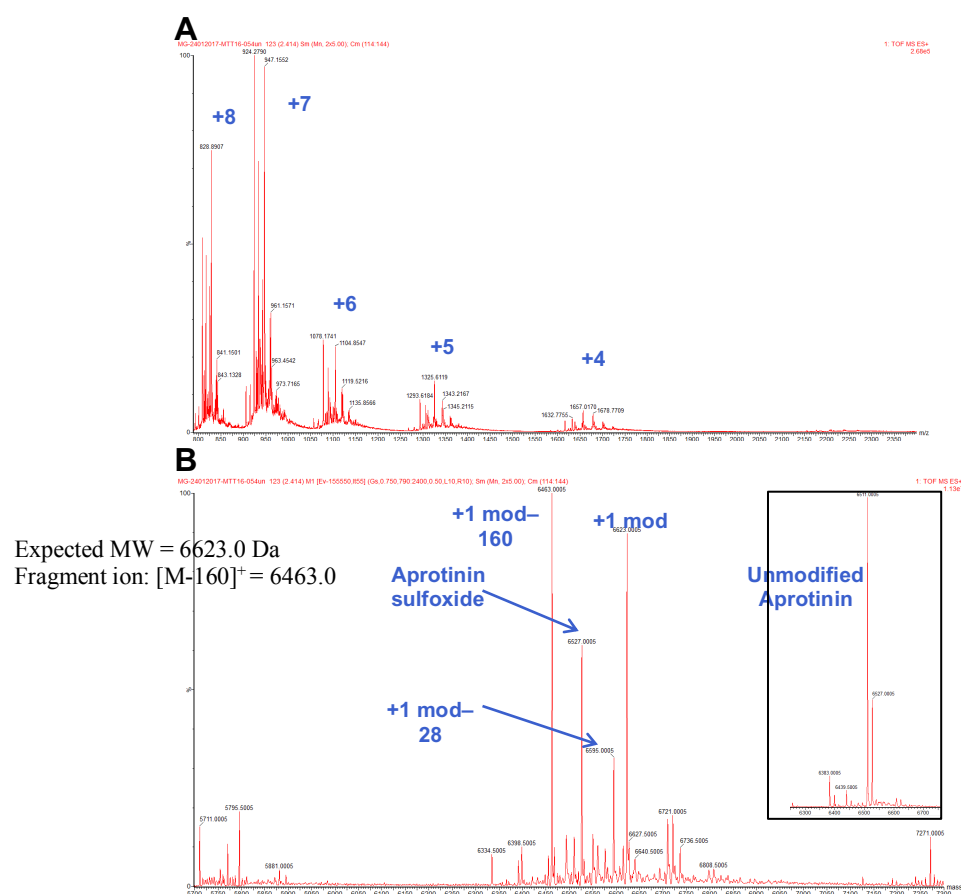

**Figure S34.** (A) Mass chromatogram of the crude reaction mixture between Aprotinin and **1b** to form **10**. (B) Deconvoluted mass spectrum of the crude reaction to form **10**. The insert depicts the deconvoluted mass spectrum of unmodified Aprotinin.

## Functionalization of Ubiquitin with **1b** to form **11**.

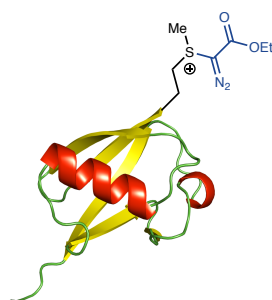

A 2 mL vial equipped with a magnetic stirrer was evacuated and refilled with N<sub>2</sub>. To the vial was added an N<sub>2</sub>-sparged solution containing Ubiquitin (1 mM in 0.1M thiourea (aq), 20 μL), an N<sub>2</sub>-sparged solution of thiourea (100 mM in H<sub>2</sub>O, 20μL), formic acid (100 mM, 10 μL) and N<sub>2</sub>-sparged H<sub>2</sub>O (50 μL), and the resulting solution was stirred vigorously. To the stirring solution was added **1b** (100 mM in CH<sub>3</sub>CN, 100 μL) and the resulting solution stirred for 5 minutes. The resulting mixture was then extracted twice with 1:1 diethyl ether:ethyl acetate. The remaining organic volatiles were then removed from the aqueous layer using a rotary evaporator. The resulting solution was then analyzed directly *via* LC/MS, (C4 column, Gradient: 5-100% B over 5.2 min then hold for 1 min, then 100-5%B over 1 min, 0.2 ml/min) and was judged to have proceeded in 88% conversion with a **11**:double modification ratio of 10:1 (**Figure S35**).

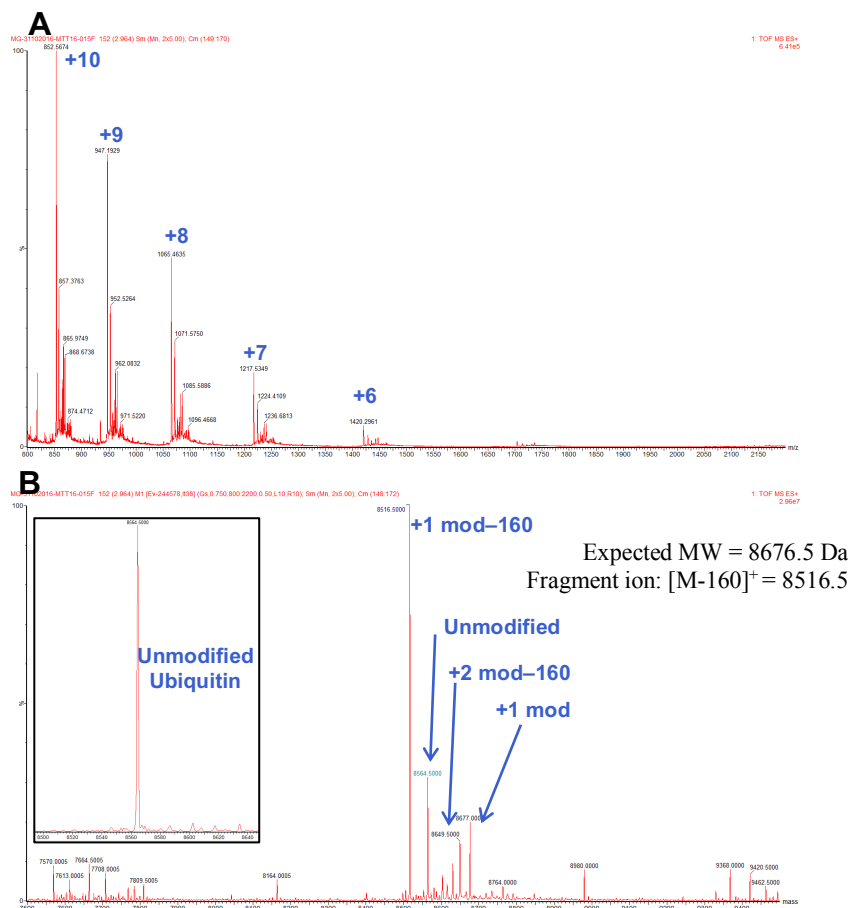

**Figure S35.** (A) Mass chromatogram of the crude reaction mixture between Ubiquitin and **1b** to form **11**. (B) Deconvoluted mass spectrum of the crude reaction to form **11**. The insert depicts the deconvoluted mass spectrum of unmodified Ubiquitin.

### Large Scale Synthesis of **11**

*\*This larger scale reaction was run to partial completion in order to exemplify the purification of starting Ubiquitin and diazoester conjugate **11***

A 2 mL vial equipped with a magnetic stirrer was charged with Ubiquitin (~1.5 mg, ~0.2  $\mu\text{mol}$ ). To the vial was added thiourea (100 mM in  $\text{H}_2\text{O}$ , 100  $\mu\text{L}$ ), formic acid (0.1M in  $\text{H}_2\text{O}$ , 25  $\mu\text{L}$ ) and  $\text{H}_2\text{O}$  (125  $\mu\text{L}$ ). To the stirring solution was added **1b** (100 mM in  $\text{H}_2\text{O}$ , 250  $\mu\text{L}$ ) and the resulting solution stirred for 5 minutes at room temperature. The resulting mixture was then extracted twice with 1:1 diethyl ether:ethyl acetate. The remaining organic volatiles were then removed from the aqueous layer using a rotary evaporator. **11** was purified by ion exchange chromatography (MonoS 4.6/100 PE column, GE Healthcare) using a NaCl gradient (0-1 M) in 50 mM ammonium acetate pH 4.5 on an ÄKTAexplorer (Pharmacia Biotech), and fractions directly analysed by MS.

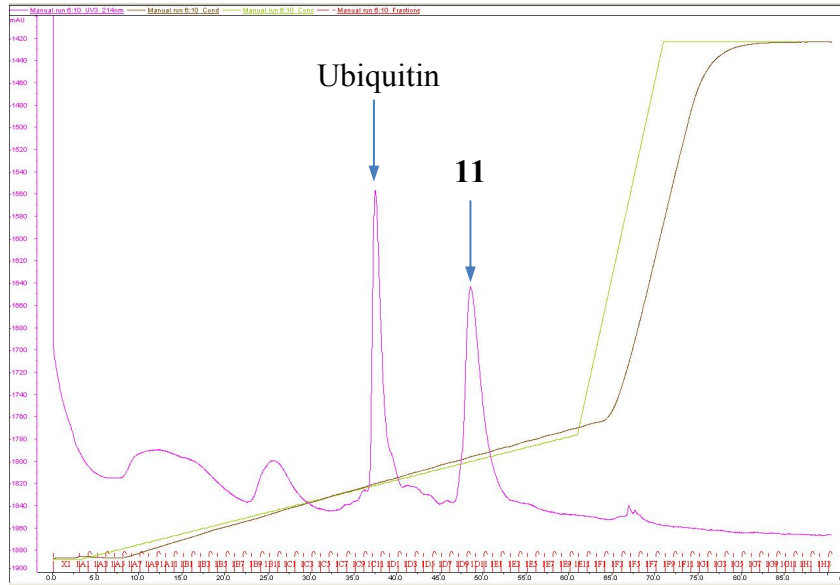

**Figure S36:** FPLC trace of Ubiquitin conjugate **11**, purified using MonoS 4.6/100 PE column, GE Healthcare. Clear separation of unmodified Ubiquitin and modified conjugate **11** was achieved due to the differing elution times of the charged species **11** and uncharged, unmodified ubiquitin using an ion exchange column. Diagnostic fragment ion of [Ub+mod-160] MW = 8516.5 was observed in the product peak of **11**. Hence, this indicates that the diagnostic fragmentation must be an artefact of the mass spectrometer, as proposed, otherwise the uncharged resulting species would have a dramatically different retention time using this ion exchange purification method.

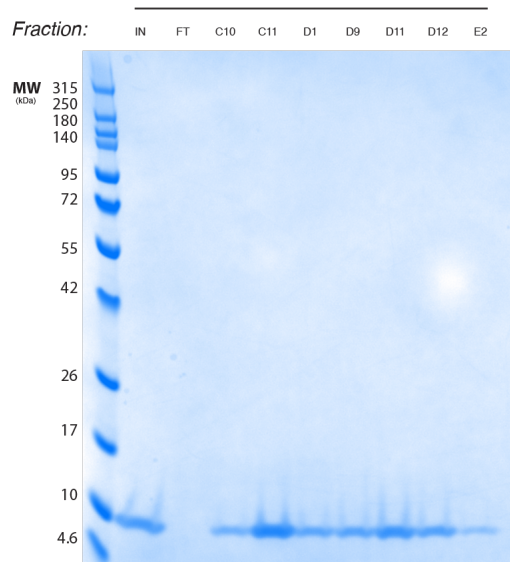

**Figure S37:** Gel of purified Ubiquitin fractions from FPLC purification run with Bolt 4-12% Bis-Tris gels (Thermo Scientific) and were run for 30 min at 165V (constant) using MES buffer (Thermo Scientific). The ladder on the gel is ProSieve QuadColor protein marker (4.6 kDa – 300 kDa; Lonza) and the gel was stained using InstantBlue (Generon)

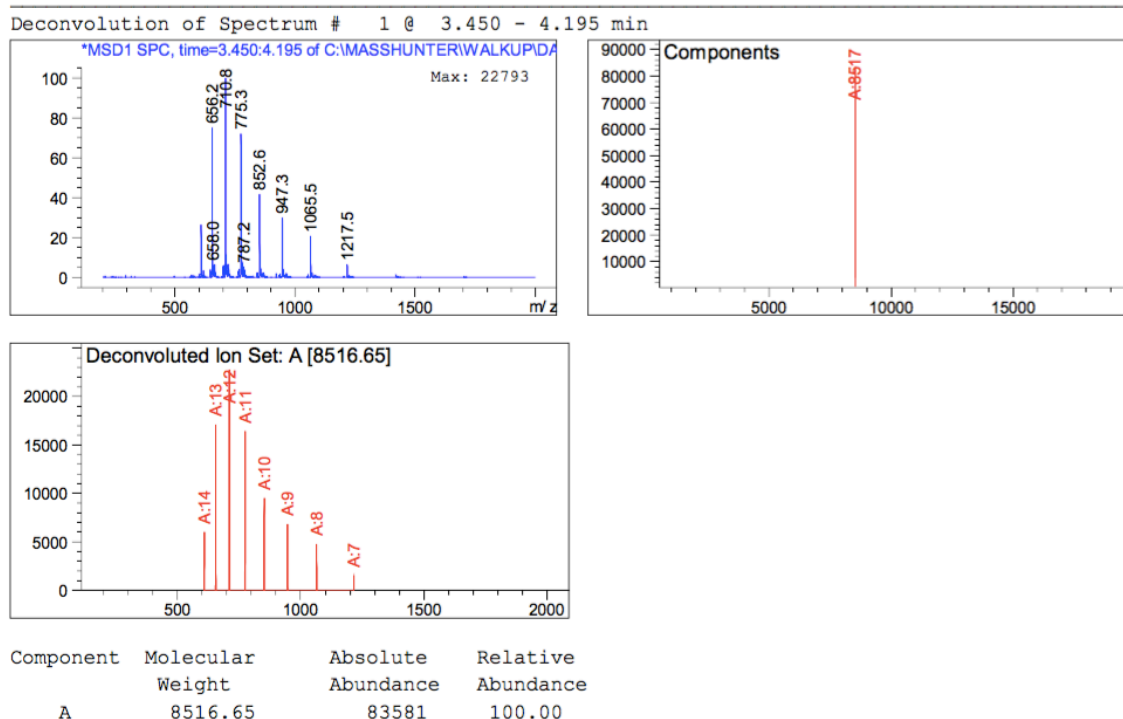

**Figure S38:** Protein LCMS and deconvoluted MS of purified fraction of **11** from IEX column, showing fragment ion of **11**-160. Were this the iminolactone byproduct, this would likely have hydrolysed to the homoserine lactone and would have eluted at a dramatically different retention time on IEX, similar to that of the parent ubiquitin.

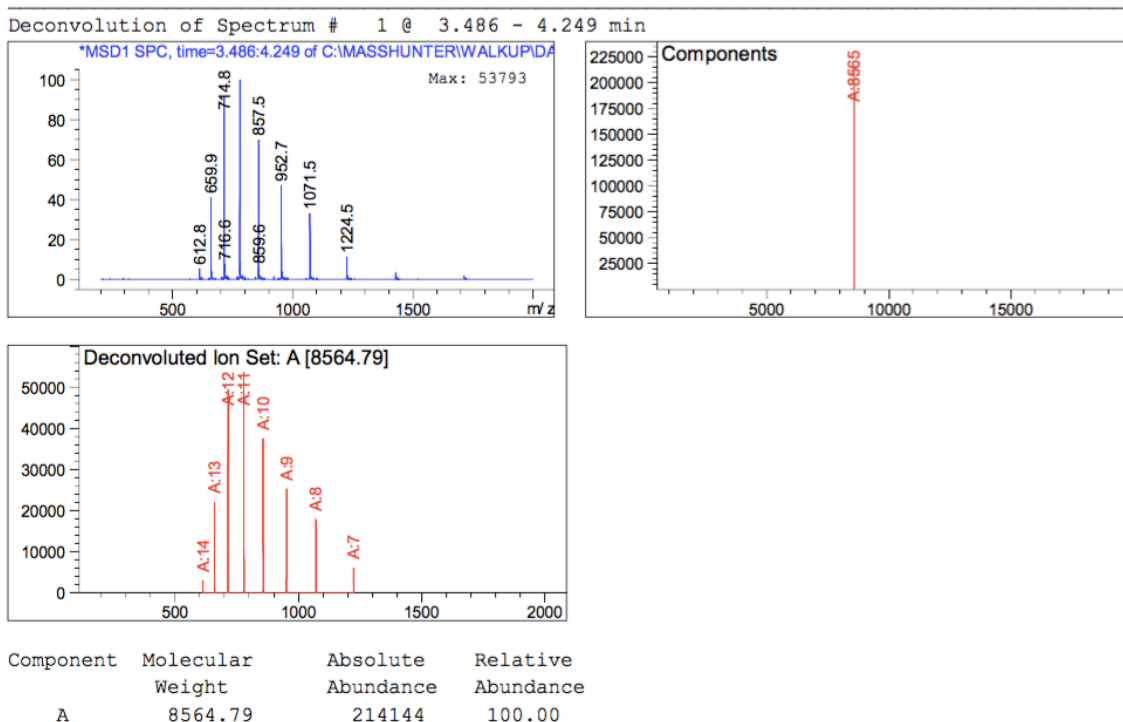

**Figure S39:** Protein LCMS and deconvoluted MS of purified ubiquitin.

## Functionalization of GTP Binding Protein Fragment-G $\alpha$ with **1b** to form **12**.

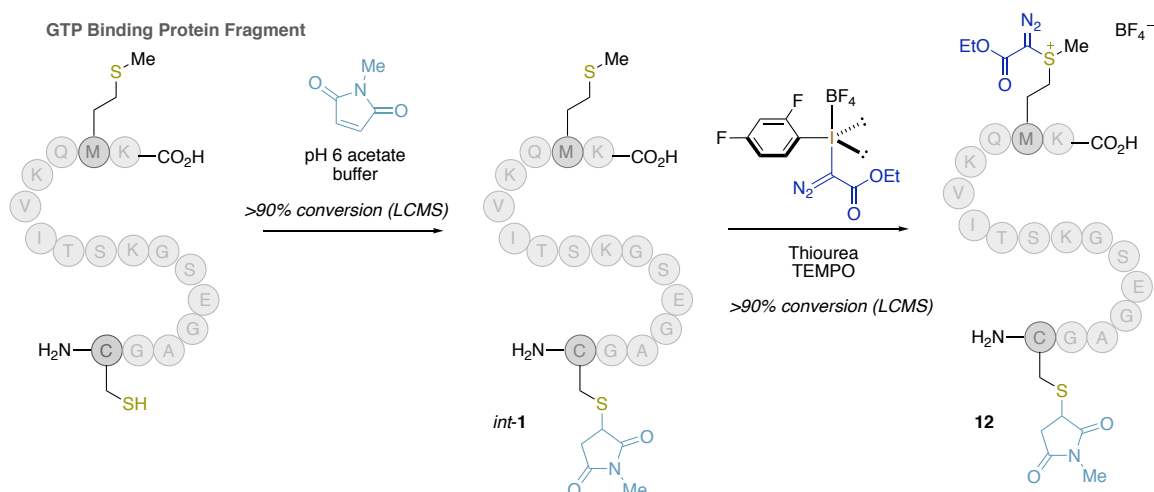

A 2 mL vial equipped with a magnetic stirrer was charged with a solution of GTP Binding Protein Fragment  $\alpha$  (1 mM in pH 6 buffer, 50  $\mu$ L). To the vial was added a solution of N-methyl maleimide (10 mM in MeCN, 50  $\mu$ L) and the resulting solution stirred vigorously for 30 minutes at room temperature. The resulting solution was then analyzed directly *via* LC/MS C18 column ((150 x 10 mm, 10  $\mu$ m), gradient: 5-95% B over 5 min then hold for 0.5 min, 0.7 mL/min), and was judged to have proceeded in >90% conversion in relation to starting material (Figure S20). A 2 mL vial equipped with a magnetic stirrer was charged with the crude reaction solution (500  $\mu$ M in 1:1 pH6 buffer:MeCN, 100  $\mu$ L). To the vial was added thiourea (100 mM in H<sub>2</sub>O, 30  $\mu$ L). To the resulting solution was added TEMPO (67 mM in H<sub>2</sub>O, 30  $\mu$ L) immediately followed by iodonium salt **1b** (250 mM in H<sub>2</sub>O, 40  $\mu$ L) and the reaction stirred vigorously for 2 minutes at room temperature. The resulting mixture was extracted twice with ethyl acetate:diethyl ether (1:1). The remaining organic volatiles were removed from the aqueous layer using a rotary evaporator, and the aqueous layer analysed directly *via* LC/MS C18 column ((150 x 10 mm, 10  $\mu$ m), gradient: 5-95% B over 5 min then hold for 0.5 min, 0.7 mL/min), and was judged to have proceeded in >90% conversion in relation to starting material (Figure S40).

**A**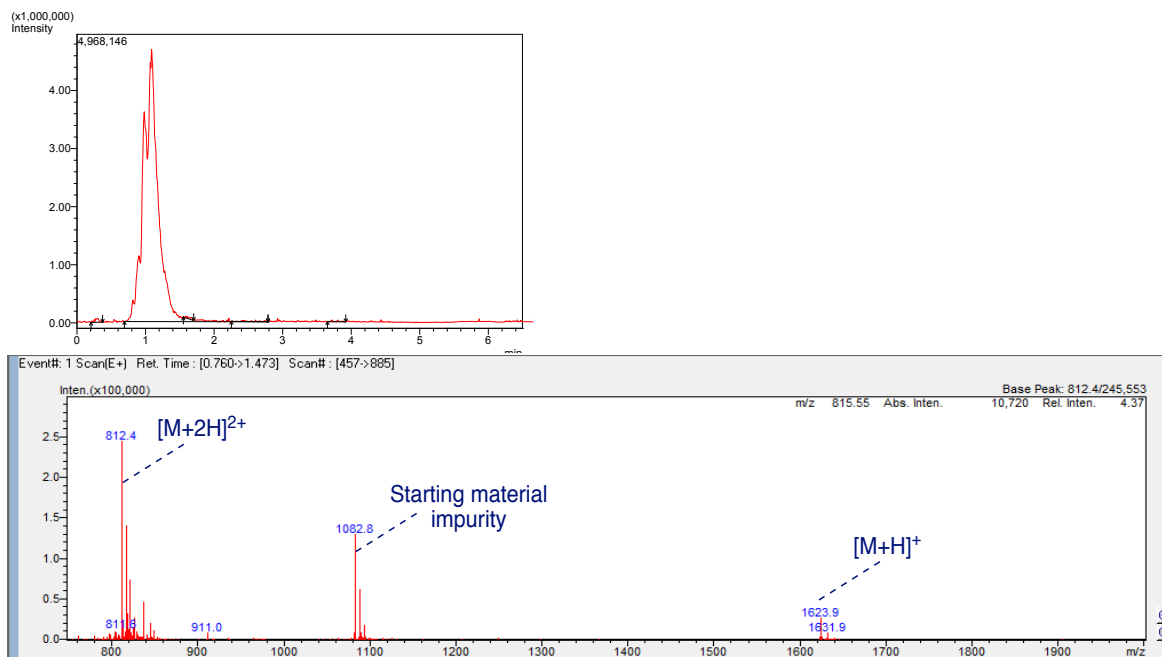**B**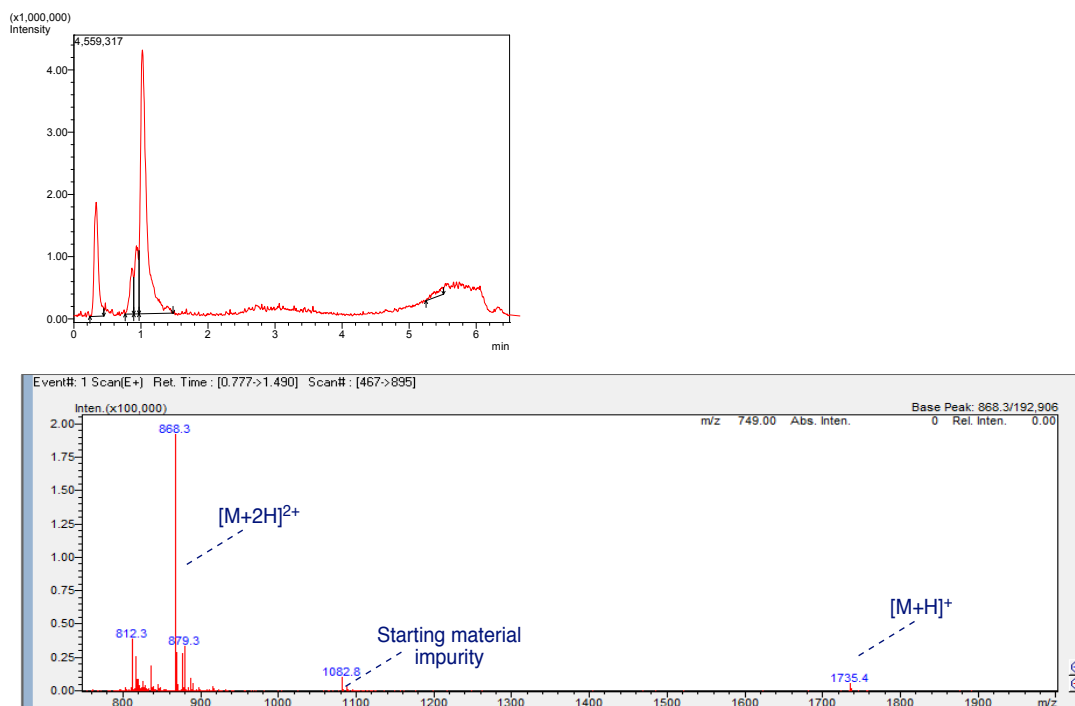



**C**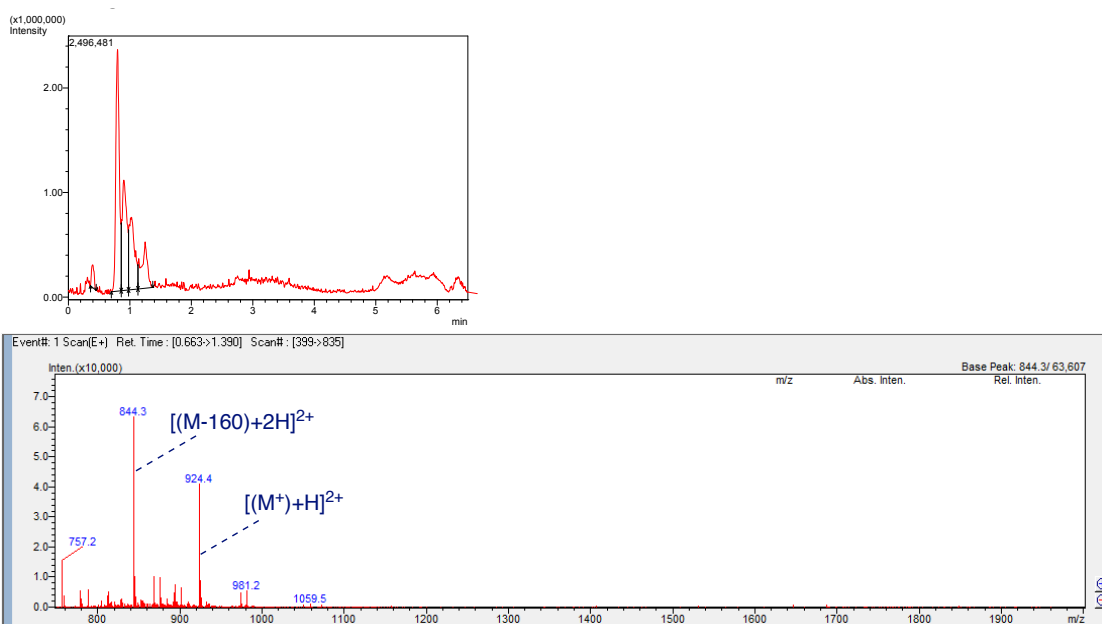

**Figure S40:** (A) Chromatogram and mass trace of parent GTP Binding Protein Fragment  $\alpha$  - estimated at  $\sim 75\%$  purity. (B) Chromatogram and mass trace of intermediate *int-1* from crude reaction of GTP Binding Protein Fragment-G $\alpha$  and N-methyl maleimide. (C) Chromatogram and mass trace of crude reaction to form **12**

## Phosphine promoted “de-ligation” of $\alpha$ -sulfoniumdiazoesters

### Phosphine promoted “De-ligation” of conjugate **4f**.

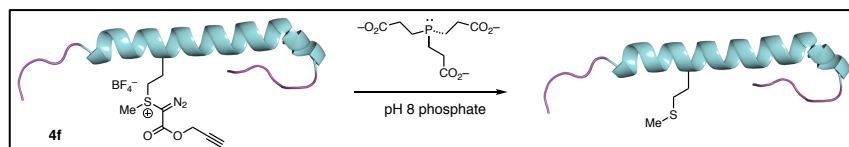

A vial was charged with a solution containing sulfonium conjugate **4f** (600  $\mu$ M, 20  $\mu$ L). To the vial was added a solution of Tris-(2-carboxyethyl) phosphine (1.3 mM in pH 8 phosphate buffer, 80  $\mu$ L), and vial was allowed to stand for 30 minutes. The resulting solution was then analyzed directly *via* LC/MS (Pentafluorophenyl column (50 x 2.1 mm, 2.6 $\mu$ m), Gradient: 5-95% B over 5 min then hold for 0.5 min, 0.7 ml/min), and the ligation reversal was judged to have proceeded in 90% conversion. A similar reaction ( $[4f] = 64 \mu$ M) was performed in pH 3 formic acid buffer, which slowed the rate of conjugate hydrolysis, allowing for the observation of the formation of reduced **4f'** (Figure S41).

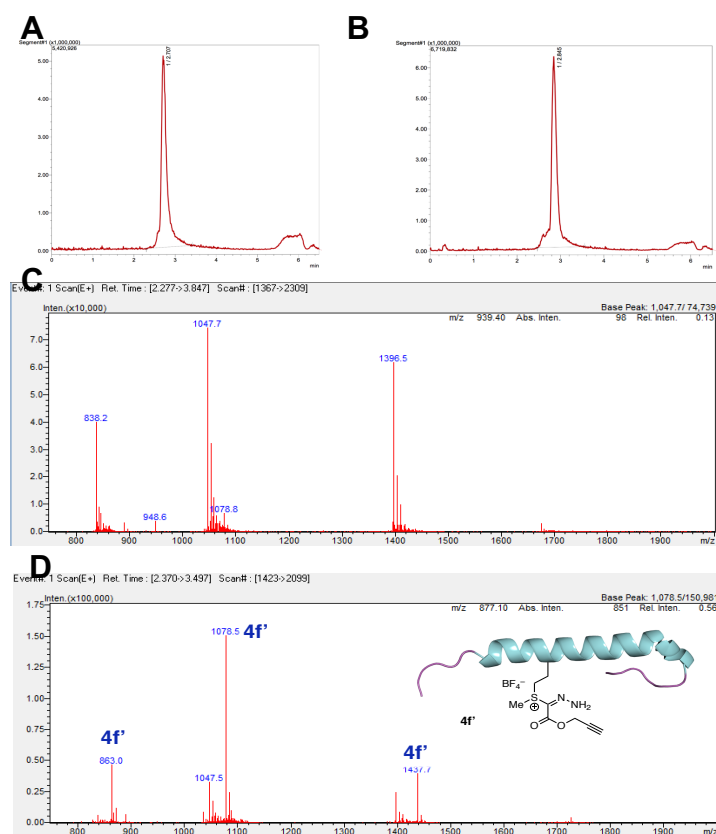

**Figure S41.** (A) Mass trace of **4f**. (B) Mass trace of the crude mixture between **4f** and TCEP at pH 8. (C) Mass spectrum of the crude mixture between **4f** and TCEP at pH 8 (positive ionization mode, TIC from  $T_R=2.78$ -3.85 min.) (D) Mass spectrum of the crude mixture between **4f** and TCEP at pH 3 (positive ionization mode, TIC from  $T_R=2.37$ -3.50 min).

## Phosphine promoted “De-ligation” of aviptadil conjugate **5**

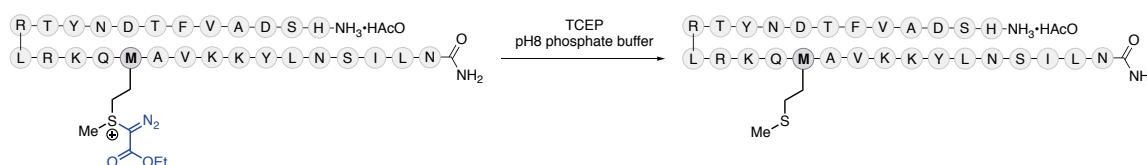

A vial was charged with a solution containing sulfonium conjugate **5** (750 μM, 25 μL). To the vial was added a solution of Tris-(2-carboxyethyl) phosphine (1.7 mM in pH 8 phosphate buffer, 50 μL) and H<sub>2</sub>O (25 μL) and vial was allowed to stand for 30 minutes. The resulting solution was then analyzed directly *via* LC/MS (C18 column (50 x 2.1 mm, 2.6μm), Gradient: 5-95% B over 5 min then hold for 0.5 min, 0.7 ml/min), and the ligation reversal was judged to have proceeded in >95% conversion (**Figure S42**).

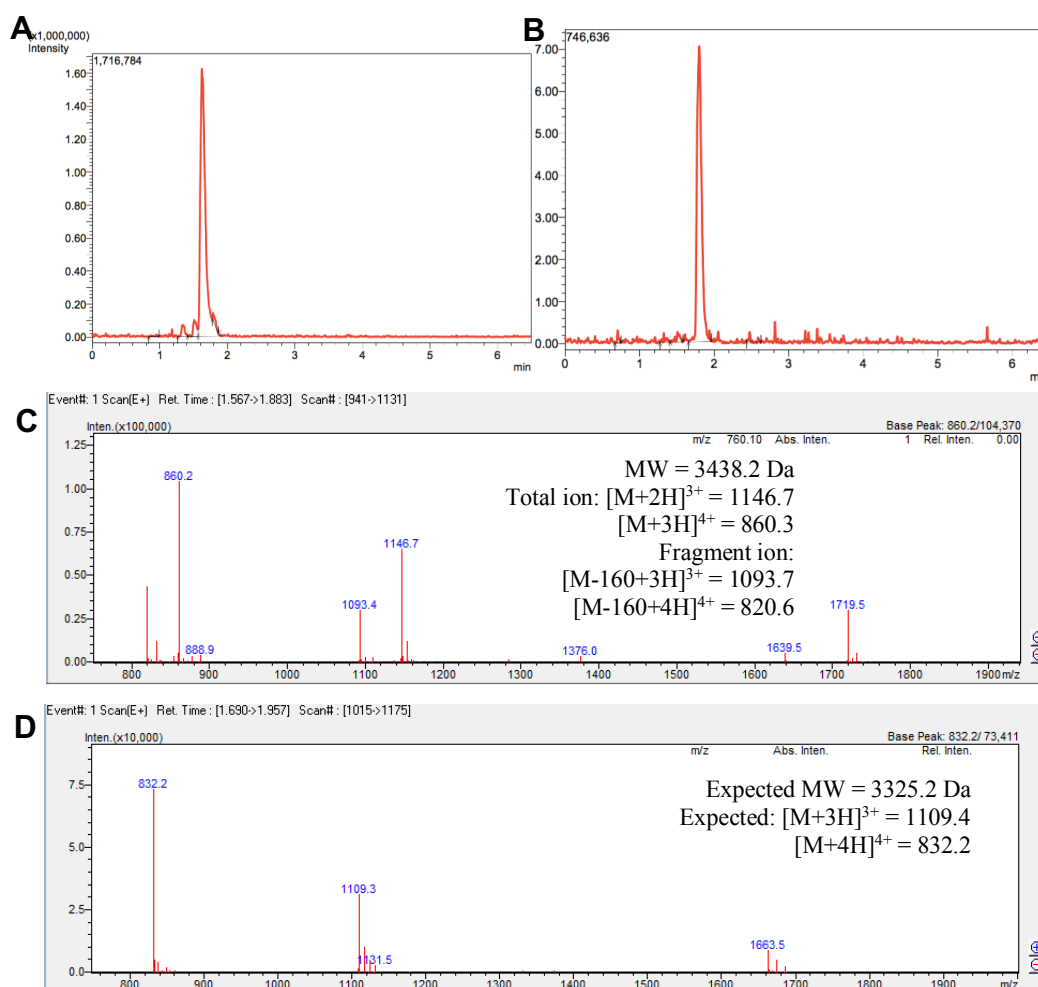

**Figure S42:** (A) Mass trace of **5**. (B) Mass trace of the crude mixture between **5** and TCEP at pH 8. (C) Mass spectrum of **5** (positive ionization mode, TIC from  $T_R=1.57-1.88$  min.) (D) Mass spectrum of the crude mixture between **5** and TCEP at pH 8 (positive ionization mode, TIC from  $T_R=1.69-1.96$  min.) showing full conversion to free aviptadil.

## Phosphine promoted “De-ligation” of Tetracosactide conjugate **6**

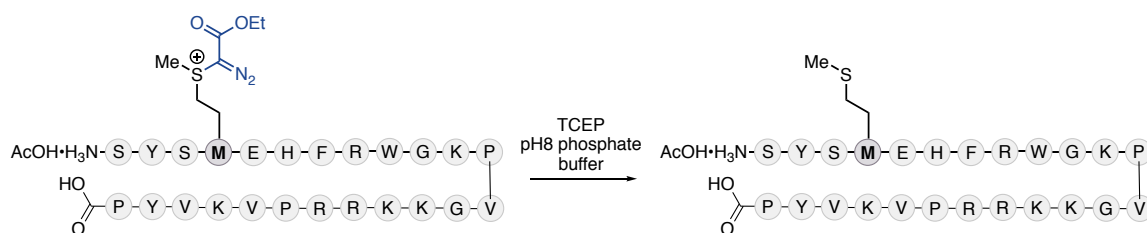

A vial was charged with a solution containing sulfonium conjugate **6** (650  $\mu$ M, 15  $\mu$ L). To the vial was added a solution of Tris-(2-carboxyethyl) phosphine (1.7 mM in pH 8 phosphate buffer, 50  $\mu$ L) and H<sub>2</sub>O (35  $\mu$ L) and vial was allowed to stand for 30 minutes. The resulting solution was then analyzed directly *via* LC/MS (C18 column (50 x 2.1 mm, 2.6 $\mu$ m), Gradient: 5-95% B over 5 min then hold for 0.5 min, 0.7 ml/min), and the ligation reversal was judged to have proceeded in >95% conversion (**Figure S43**).

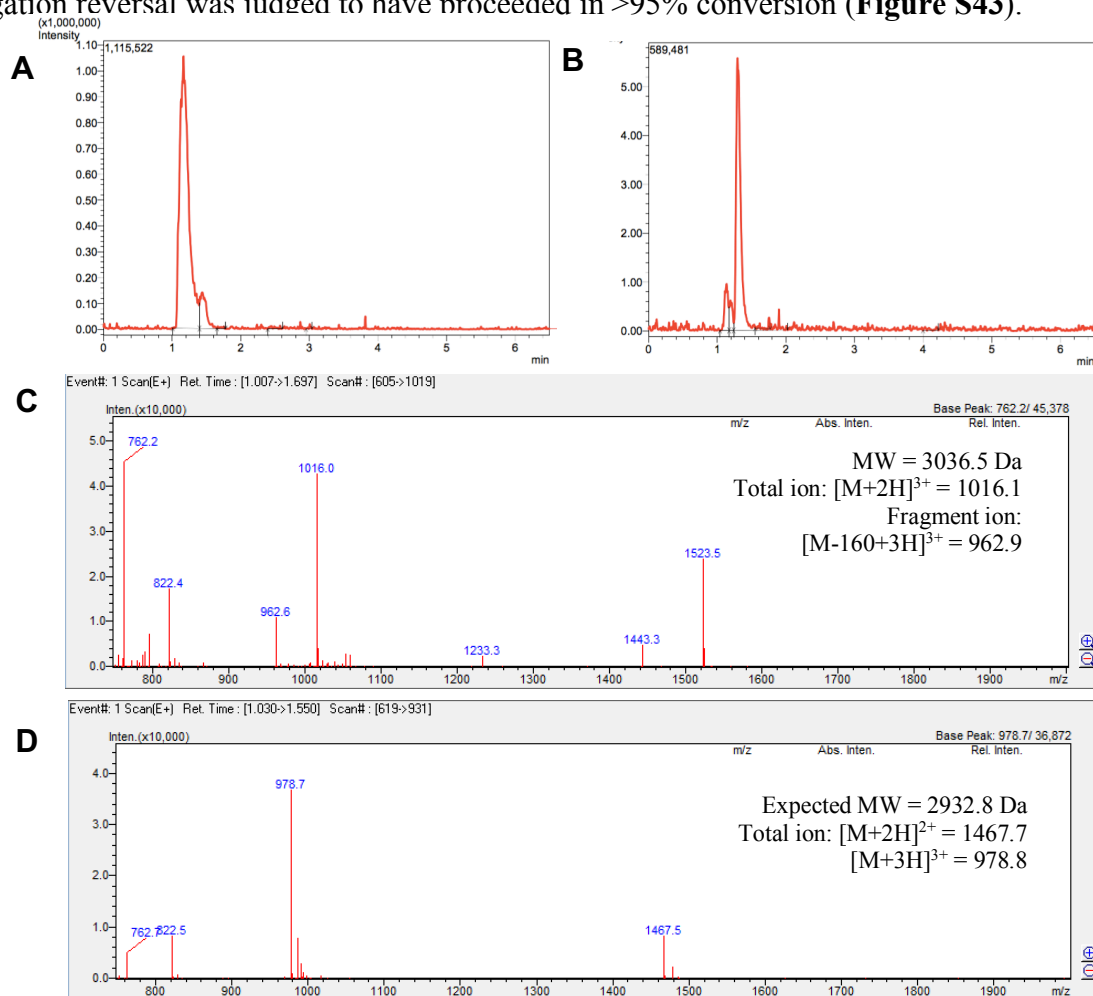

**Figure S43:** (A) Mass trace of **6**. (B) Mass trace of the crude mixture between **6** and TCEP at pH 8. (C) Mass spectrum of **6** (positive ionization mode, TIC from  $T_r=1.01$ -1.69 min.) (D) Mass spectrum of the crude mixture between **6** and TCEP at pH 8 (positive ionization mode, TIC from  $T_r=1.03$ -1.55 min.) showing full conversion to free tetracosactide.

## Phosphine promoted “De-ligation” of Teriparatide conjugate **8**

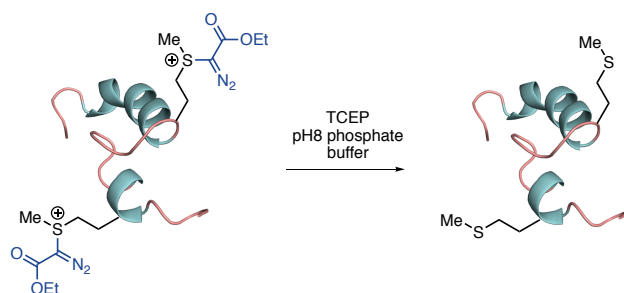

A vial was charged with a solution containing sulfonium conjugate **8** (500  $\mu$ M, 20  $\mu$ L). To the vial was added a solution of Tris-(2-carboxyethyl) phosphine (1.7 mM in pH 8 phosphate buffer, 50  $\mu$ L) and H<sub>2</sub>O (30  $\mu$ L) and vial was allowed to stand for 30 minutes. The resulting solution was then analyzed directly *via* LC/MS (C18 column (50 x 2.1 mm, 2.6 $\mu$ m), Gradient: 5-95% B over 5 min then hold for 0.5 min, 0.7 ml/min), and the ligation reversal was judged to have proceeded in >95% conversion

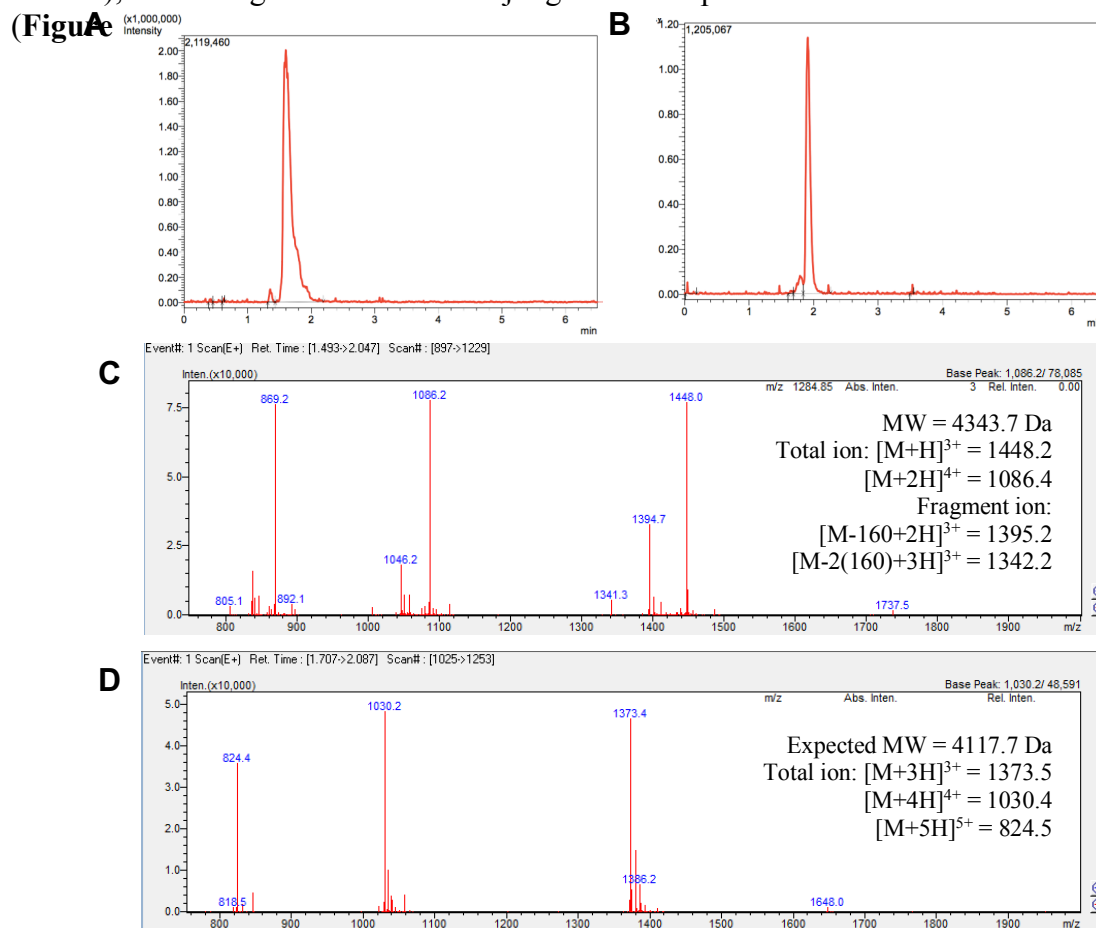

**Figure S44:** (A) Mass trace of **8**. (B) Mass trace of the crude mixture between **8** and TCEP at pH 8. (C) Mass spectrum of **8** (positive ionization mode, TIC from  $T_r=1.49$ -2.05 min.) (D) Mass spectrum of the crude mixture between **8** and TCEP at pH 8 (positive ionization mode, TIC from  $T_r=1.71$ -2.09 min.) showing full conversion to free teriparatide.

## Photochemical Reduction of $\alpha$ -sulfoniumdiazoesters.

### (6*S*)-10-diazo-6-(methoxycarbonyl)-2,2,9-trimethyl-4,11-dioxo-3,12-dioxa-9-thia-5-azatetradecan-9-ium tetrafluoroborate (**3c**).

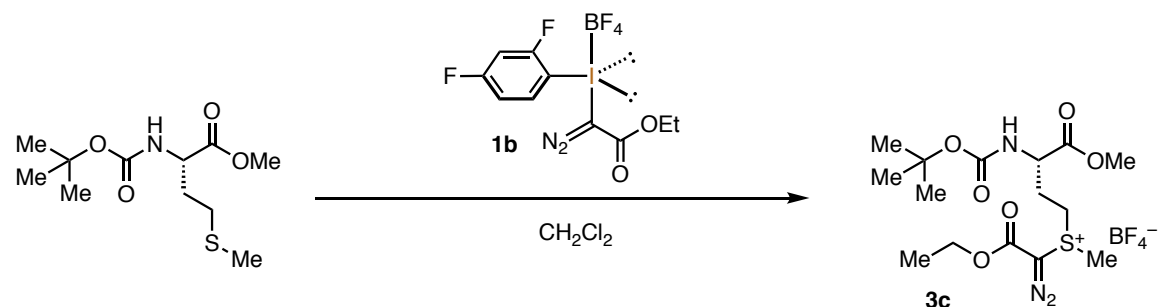

A one-dram vial equipped with a magnetic stirrer was charged with methyl (*tert*-butoxycarbonyl)-*L*-methioninate (13 mg, 0.05 mmol). To the vial was added methylene chloride (0.5 mL). To the rapidly stirring solution was added **1b** (22 mg, 0.05 mmol) in a single portion, and the resulting solution was allowed to stir at room temperature for 1 hour. The magnetic stirrer was then removed, and the solution precipitated by addition of 40-60 petroleum ether and standing in a 4°C refrigerator. The supernatant was then decanted, and the residue dried *in vacuo* to yield **3c** as a faint yellow residue (22 mg, 93%, 1:1 mixture of diastereomers). **3c** was considerably hygroscopic and should be stored in a -20°C freezer.

**<sup>1</sup>H-NMR (500 MHz, CD<sub>3</sub>CN)  $\delta$ :** 5.84 (s, br, 1H), 4.83 (app q,  $J = 7.1$  Hz, 2H), 4.32 (s, br, 1H), 3.89-3.80 (m, 1H), 3.74 (s, 3H), 3.61-3.50 (m, 1H), 3.20 (s, 1.5 H), 3.19 (s, 1.5H), 2.45-2.36 (m, 1H), 2.23-2.10 (m, 1H), 1.45 (s, 9H), 1.37-1.32 (m, 3H).

**<sup>13</sup>C-NMR (125 MHz, CD<sub>3</sub>CN)  $\delta$ :** 171.1, 160.0 (2C), 155.8, 79.9, 79.8, 63.6, 53.7 (br), 52.2 (2C), 51.9 (br, 2C), 42.2 (br), 41.5 (br), 27.4, 26.6 (br), 26.5 (br), 13.3.

**IR:** 3389, 2979, 2146, 1700, 1516 (br), 1516, 1368, 1274, 1162, 854, 737.

**HRMS-(ESI)<sup>+</sup> (m/z) Found (M<sup>+</sup>):** 376.1548, Calc'd C<sub>15</sub>H<sub>26</sub>O<sub>6</sub>N<sub>3</sub>S requires 376.1537.

## Functionalization of Exenatide•OAc with **1h** to form **4g**

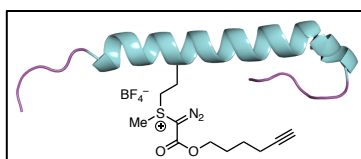

The labeling of Exenatide•OAc was performed according to general procedure B using a solution of Exenatide•OAc (1 mM in 100 mM thiourea, 80  $\mu$ L), Tempo (33 mM in H<sub>2</sub>O, 120  $\mu$ L), and **1h** (100 mM in CH<sub>3</sub>CN) a reaction time of 30 minutes, and 1:1 diethyl ether:ethyl acetate in the extraction step. The resulting solution was then analyzed directly *via* LC/MS (Pentafluorophenyl column (50 x 2.1 mm, 2.6 $\mu$ m), Gradient: 5-95% B over 5 min then hold for 0.5 min, 0.7 ml/min), and was judged to have proceeded in >90% conversion (**Figure S45**).

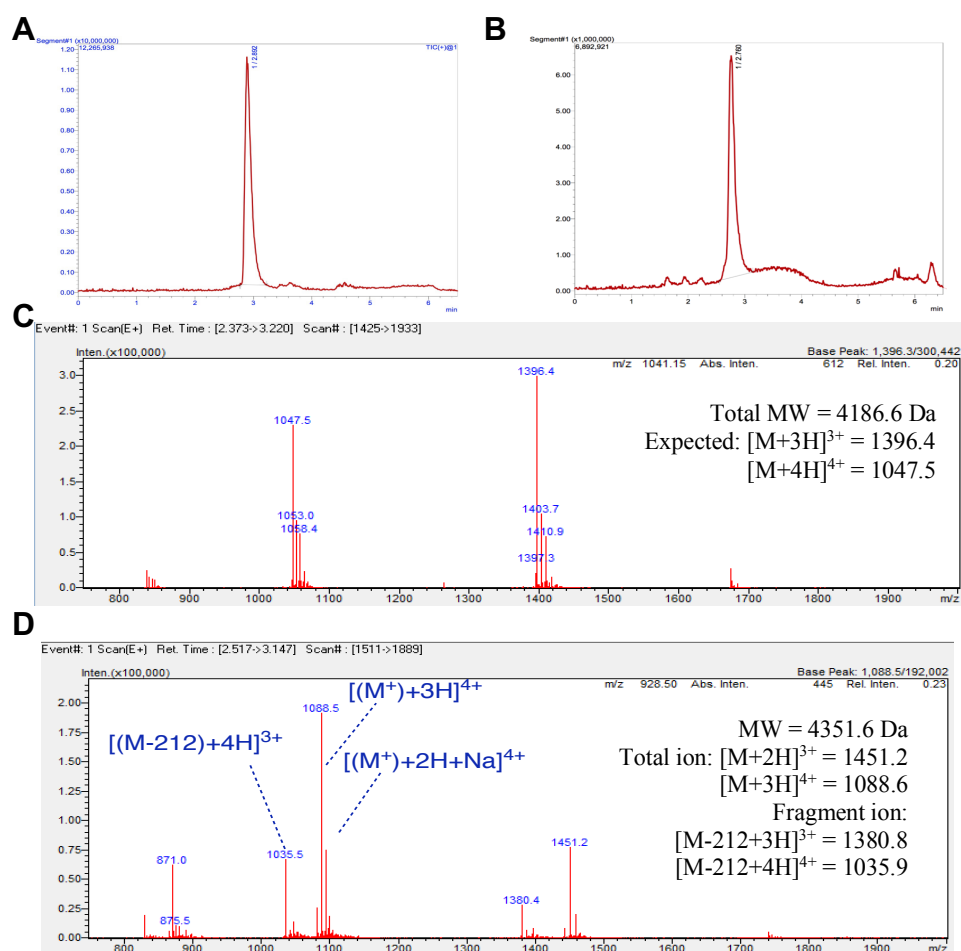

**Figure S45.** (A) Mass trace of parent Exenatide•OAc. (B) Mass trace of the crude mixture between Exenatide and **1h**. (C) Mass chromatogram of exenatide (positive ionization mode, TIC from  $T_R=2.5$ -3.2 min.) (D) Mass chromatogram of the crude reaction to form **4g** (positive ionization mode, TIC from  $T_R=2.53$ -3.15 min.)

**Table S3.** Optimization of the Photochemical Reduction Process.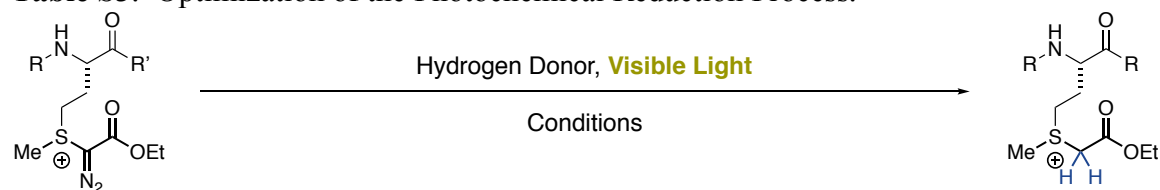

| Entry           | Substrate                      | Photocatalyst ([cat])                     | Hydrogen Donor         | Solvent                                                 | Atmosphere             | %Conversion       | 17a or 4h<br>%17a or 4h |
|-----------------|--------------------------------|-------------------------------------------|------------------------|---------------------------------------------------------|------------------------|-------------------|-------------------------|
| 1               | <b>3c</b> [5 mM]               | Ru(BPy) <sub>3</sub> [1 mM]               | 1,4-CHD [10 mM]        | CH <sub>3</sub> CN                                      | Sparged N <sub>2</sub> | 53% <sup>a</sup>  | 7% <sup>a</sup>         |
| 2               | <b>3c</b> [5 mM]               | Ru(BPy) <sub>3</sub> [1 mM]               | none                   | CH <sub>3</sub> CN                                      | Sparged N <sub>2</sub> | 48% <sup>a</sup>  | 10% <sup>a</sup>        |
| 3               | <b>3c</b> [5 mM]               | Ir[(dtbBPY)(ppy) <sub>2</sub> ] [1 mM]    | 1,4-CHD [10 mM]        | CH <sub>3</sub> CN                                      | Sparged N <sub>2</sub> | 65% <sup>a</sup>  | 7% <sup>a</sup>         |
| 4               | <b>3c</b> [5 mM]               | Ir[(dtbBPY)(ppy) <sub>2</sub> ] [1 mM]    | none                   | CH <sub>3</sub> CN                                      | Sparged N <sub>2</sub> | 86% <sup>a</sup>  | 22% <sup>a</sup>        |
| 5               | <b>3c</b> [5 mM]               | <i>fac</i> -Ir(ppy) <sub>3</sub> [1 mM]   | 1,4-CHD [10 mM]        | CH <sub>3</sub> CN                                      | Sparged N <sub>2</sub> | 81% <sup>a</sup>  | 19% <sup>a</sup>        |
| 6               | <b>3c</b> [5 mM]               | <i>fac</i> -Ir(ppy) <sub>3</sub> [1 mM]   | none                   | CH <sub>3</sub> CN                                      | Sparged N <sub>2</sub> | 83% <sup>a</sup>  | 35% <sup>a</sup>        |
| 7               | <b>3c</b> [5 mM]               | <i>fac</i> -Ir(ppy) <sub>3</sub> [1 mM]   | 1,4-CHD [20 mM]        | CH <sub>3</sub> CN                                      | Sparged N <sub>2</sub> | 83% <sup>a</sup>  | 36% <sup>a</sup>        |
| 8               | <b>3c</b> [5 mM]               | <i>fac</i> -Ir(ppy) <sub>3</sub> [1 mM]   | 1,4-CHD [40 mM]        | CH <sub>3</sub> CN                                      | Sparged N <sub>2</sub> | 98% <sup>a</sup>  | 43% <sup>a</sup>        |
| 9               | <b>3c</b> [5 mM]               | <i>fac</i> -Ir(ppy) <sub>3</sub> [1 mM]   | 1,4-CHD [40 mM]        | (CH <sub>3</sub> ) <sub>2</sub> CO                      | Sparged N <sub>2</sub> | 92% <sup>a</sup>  | 54% <sup>a</sup>        |
| 10              | <b>3c</b> [5 mM]               | <i>fac</i> -Ir(ppy) <sub>3</sub> [1 mM]   | 1,4-CHD [40 mM]        | 7:3 (CH <sub>3</sub> ) <sub>2</sub> CO:H <sub>2</sub> O | Sparged N <sub>2</sub> | 61% <sup>a</sup>  | 32% <sup>a</sup>        |
| 11              | <b>3c</b> [5 mM]               | <i>fac</i> -Ir(ppy) <sub>3</sub> [500 μM] | Hantzsch Ester [15 mM] | 1:1 (CH <sub>3</sub> ) <sub>2</sub> CO:H <sub>2</sub> O | Sparged N <sub>2</sub> | >95% <sup>b</sup> | 94% <sup>b</sup>        |
| 12              | <b>3c</b> [5 mM]               | <i>fac</i> -Ir(ppy) <sub>3</sub> [500 μM] | Hantzsch Ester [15 mM] | 1:1 CH <sub>3</sub> CN:H <sub>2</sub> O                 | Sparged N <sub>2</sub> | >95% <sup>b</sup> | 95% <sup>b</sup>        |
| 13              | <b>3c</b> [5 mM]               | none                                      | Hantzsch Ester [15 mM] | 1:1 CH <sub>3</sub> CN:H <sub>2</sub> O                 | Sparged N <sub>2</sub> | >95% <sup>b</sup> | 93% <sup>b</sup>        |
| 14 <sup>c</sup> | <b>3c</b> [5 mM]               | none                                      | Hantzsch Ester [20 mM] | 1:1 CH <sub>3</sub> CN:H <sub>2</sub> O                 | Sparged N <sub>2</sub> | 20% <sup>b</sup>  | trace <sup>b</sup>      |
| 15              | <b>4g<sup>d</sup></b> [200 μM] | none                                      | Hantzsch Ester [20 mM] | 1:1 CH <sub>3</sub> CN:H <sub>2</sub> O                 | Sparged N <sub>2</sub> | <10% <sup>a</sup> | <10% <sup>a</sup>       |
| 16              | <b>4g<sup>d</sup></b> [200 μM] | <i>fac</i> -Ir(ppy) <sub>3</sub> [200 μM] | Hantzsch Ester [20 mM] | 1:1 CH <sub>3</sub> CN:H <sub>2</sub> O                 | Sparged N <sub>2</sub> | 90% <sup>a</sup>  | 90% <sup>a</sup>        |

<sup>a</sup>Yield estimated from TIC *via* LCMS. <sup>b</sup>Yield estimated *via* <sup>1</sup>H-NMR using 1,1,2,2-tetrachloroethane as an internal standard.

<sup>c</sup>Reaction run in the dark using deuterated solvents. <sup>d</sup>**4g** was used directly from the conjugation reaction without purification.



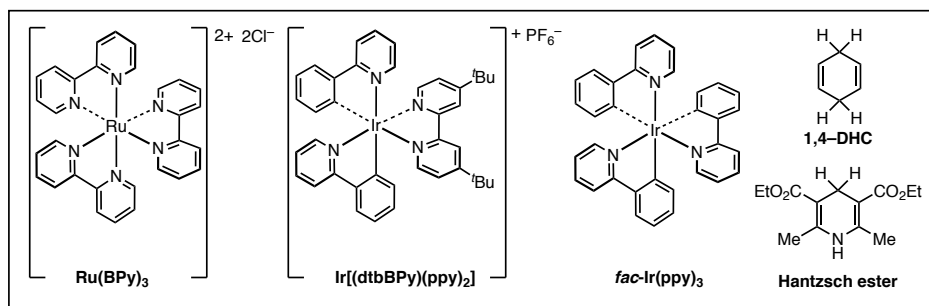

### 6-(methoxycarbonyl)-2,2,9-trimethyl-4,11-dioxo-3,12-dioxa-9-thia-5-azatetradecan-9-ium tetrafluoroborate (17a)

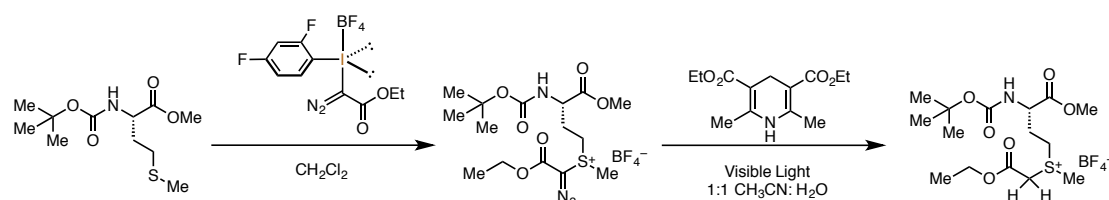

A vial equipped with a magnetic stirrer was charged with methyl (*tert*-butoxycarbonyl)-*L*-methioninate (13 mg, 0.05 mmol). To the vial was added methylene chloride (0.5 mL). To the rapidly stirring solution was added **1b** (22 mg, 0.05 mmol) in a single portion, and the resulting solution was allowed to stir at room temperature for 1 hour. The magnetic stirrer was then removed, and the solvent was removed using a rotary evaporator. The resulting residue was then triturated 5 times with diethyl ether using a sonicator. The vial was then evacuated and refilled with N<sub>2</sub>, and 2.5 mL of freshly sparged CH<sub>3</sub>CN was added.

A separate microwave tube equipped with a magnetic stirrer was charged with Hantzsch ester (25 mg, 0.098 mmol), capped with a rubber septum, and then evacuated and refilled with N<sub>2</sub>. To the tube was added freshly sparged water (2.5 mL) and the CH<sub>3</sub>CN solution containing **3c** (2.5 mL) sequentially. The resulting heterogeneous mixture was then stirred rapidly. The mixture was irradiated with a Prolite 30-watt fluorescent light bulb that was placed at a 5 centimeter distance from the microwave tube for 2 hours. A constant temperature was maintained by placing the microwave tube under a stream of air over the course of the irradiation. The reaction mixture was then transferred to a round-bottomed flask and the solvent was removed using a rotary evaporator. The resulting residue was then triturated 3 times with diethyl ether in order to remove the excess Hantzsch ester/byproducts and the supernatant carefully decanted. The remaining residue was then dried *in vacuo* to yield **17a** as an off-white, amorphous residue (18 mg, 82%, 1:1 mixture of diastereomers).

<sup>1</sup>H-NMR (400 MHz, CD<sub>3</sub>CN): 5.82 (s, br, 1H), 4.35-4.24 (m, 5H), 3.74 (s, 3H), 3.52-3.44 (m, 1H), 3.41-3.34 (m, 1H), 2.94 (s, 1.5H), 2.94 (s, 1.5H), 2.44-2.43 (m, 1H), 2.23-2.09 (m, 1H), 1.45 (s, 9H), 1.32 (app t, *J* = 7.2 Hz, 3H).

<sup>13</sup>C-NMR (125 MHz, CD<sub>3</sub>CN): 172.1, 164.8 (2C), 156.7 (br), 80.7, 64.5, 53.1, 53.0 (br), 44.7, 44.5, 39.9, 39.6, 28.4 (2C), 27.1, 27.0, 24.2 (2C), 14.1.

IR: 2992, 1731 (br), 1513, 1316, 1028 (br), 780.

HRMS-(ESI)<sup>+</sup> (*m/z*) Found (*M*<sup>+</sup>): 350.1643, Calc'd C<sub>15</sub>H<sub>18</sub>O<sub>6</sub>NS requires 350.1632.

## Two-step sequential Methionine-Labelling/photochemical Reduction of Exenatide•OAc (17b)

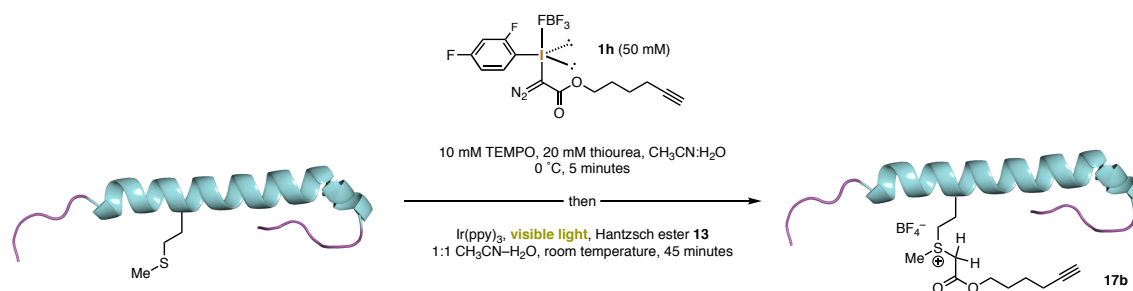

A 5 mL microwave tube equipped with a magnetic stirrer was charged with a solution of exenatide•OAc (3.7 mM in 0.1 M thiourea (aq), 70  $\mu$ L, 1 mg). To the vial was added formic acid (100 mM in H<sub>2</sub>O, 20  $\mu$ L), and the resulting solution chilled in an ice bath. To the solution was added TEMPO (33 mM in H<sub>2</sub>O, 50  $\mu$ L), H<sub>2</sub>O (30  $\mu$ L) and the solution was stirred rapidly. To the rapidly stirring solution was immediately added **1h** (100 mM in CH<sub>3</sub>CN, 170  $\mu$ L), and the resulting solution was allowed to stir for 5 minutes. The reaction mixture was then extracted 3 times with 1:1 ethyl acetate: diethyl ether, and the excess volatiles were removed from the aqueous layer using a rotary evaporator. To the resulting solution was added a magnetic stirrer and the Hantzsch ester (2.6 mg, 1.0x10<sup>-5</sup> mmol). The tube was then capped with a septum and subsequently evacuated and refilled with N<sub>2</sub> 5 times. To the tube was added *fac*-Ir(ppy)<sub>3</sub> (560  $\mu$ M in freshly sparged CH<sub>3</sub>CN, 200  $\mu$ L) and freshly sparged H<sub>2</sub>O (170  $\mu$ L). The resulting heterogeneous mixture was then stirred rapidly. The mixture was irradiated with a Prolite 30-watt fluorescent light bulb that was placed at a 5 centimeter distance from the microwave tube for 45 minutes. A constant temperature was maintained by placing the microwave tube under a stream of air over the course of the irradiation. The reaction mixture was then extracted three times with 1:1 ethyl acetate:diethyl ether and the excess volatiles were removed from the aqueous layer using a rotary evaporator. The resulting solution was then analyzed directly *via* LC/MS (C18 column (50 x 2.1 mm, 2.6 $\mu$ m), Gradient: 5-95% B over 5 min then hold for 0.5 min, 0.7 ml/min), and the ligation was judged to have proceeded in 90% conversion. Purification *via* reverse-phase HPLC (C18 column (150 x 10 mm, 10 $\mu$ m), Gradient: 5-55% B over 9 min then 55-95%B over 1min, hold for 1.5 min, then 95-5%B over 0.5 min, hold for 3 min, 5 ml/min), followed by lyophilization yielded **4h** as a free-flowing, white solid that was immediately re-dissolved in H<sub>2</sub>O (0.5 mL) and stored at -20°C. Concentration analysis by A<sub>280</sub> indicated a 1.8 mg/mL solution (90% isolated yield). **4h** contains exenatide sulfoxide as a minor impurity (<5%).

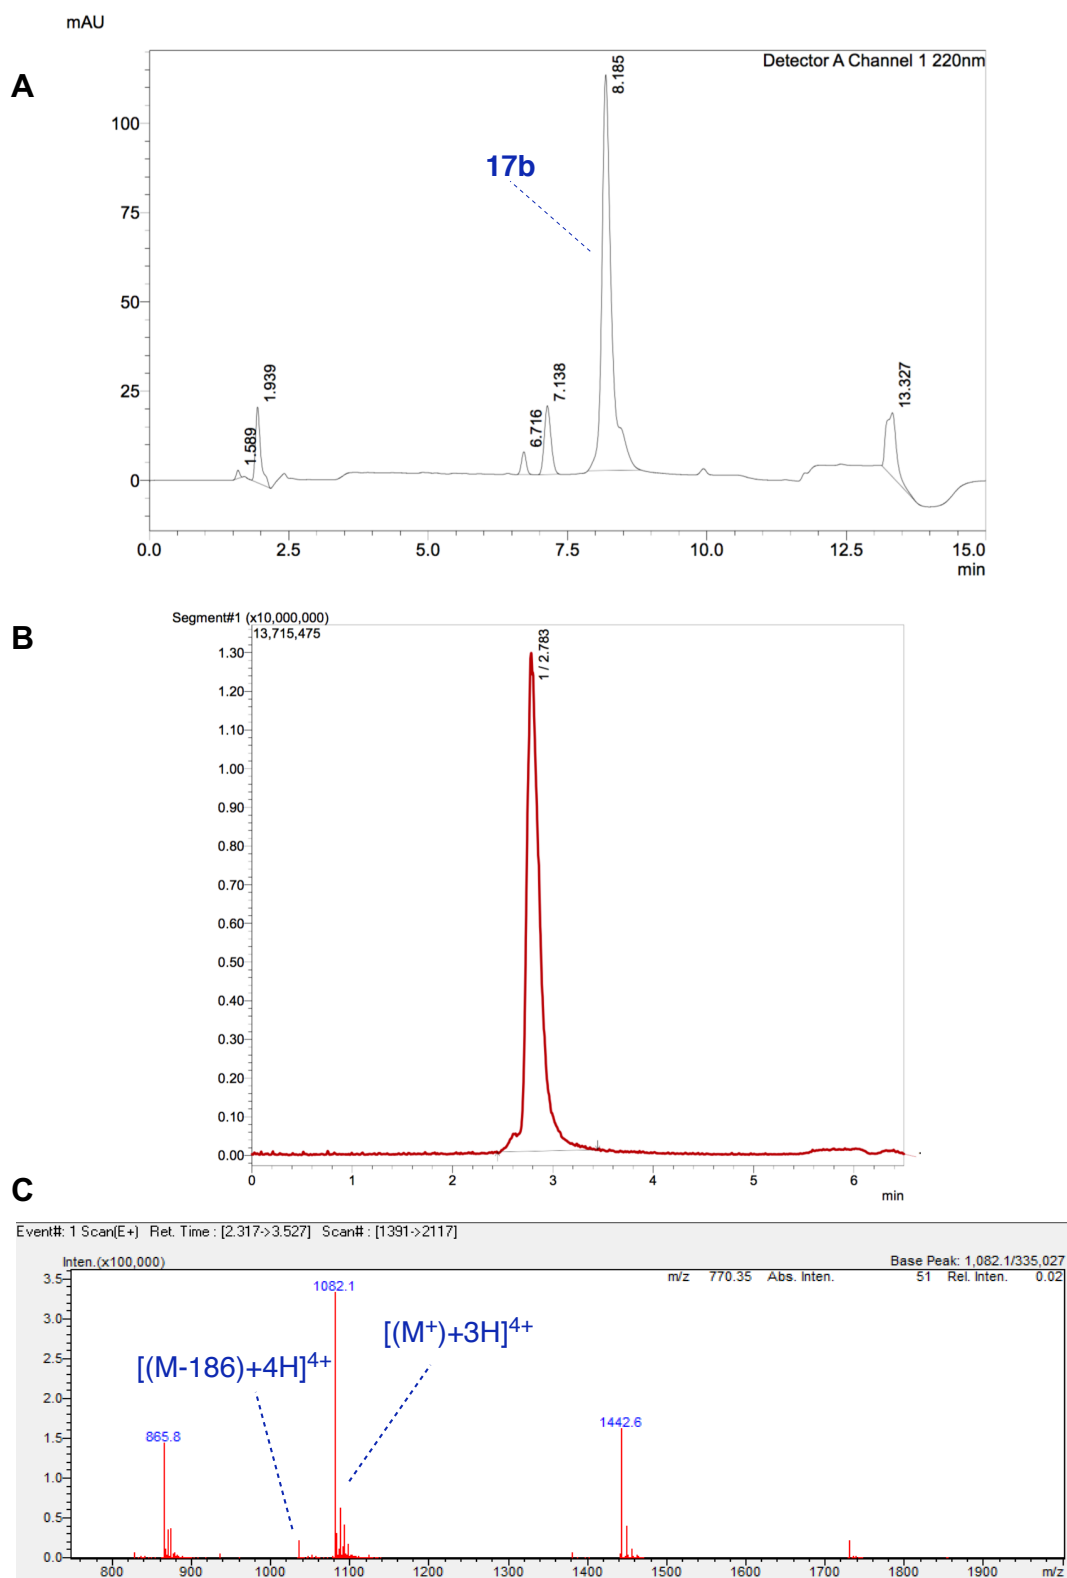

**Figure S46.** (A) HPLC trace of the crude reaction mixture to form **4h**. (B) Mass trace of purified **17b**. (C) Mass chromatogram of purified **17b**.

## Two-step sequential Methionine Labeling/photochemical Reduction of Glucagon•HCl with iodonium salt **1i** (**17c**)

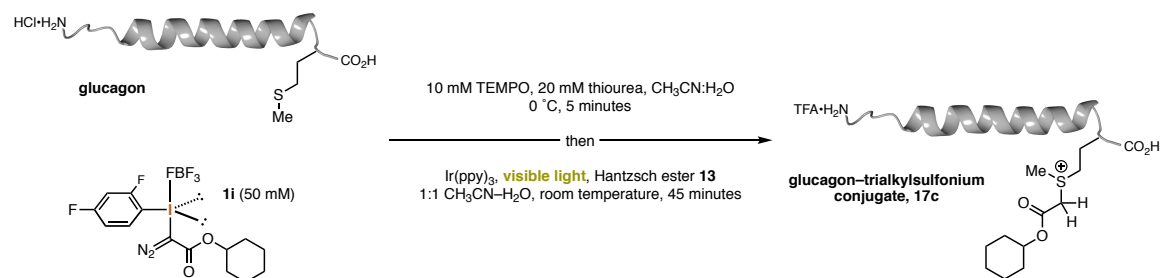

A 5 mL microwave tube equipped with a magnetic stirrer was charged with a solution of glucagon•HCl (3.3 mM in 0.1 M thiourea (aq), 70  $\mu$ L, 0.8 mg). To the vial was added formic acid (100 mM in H<sub>2</sub>O, 18  $\mu$ L), and the resulting solution chilled in an ice bath. To the solution was added TEMPO (33 mM in H<sub>2</sub>O, 90  $\mu$ L), and the solution was stirred rapidly. To the rapidly stirring solution was immediately added **1h** (0.1 M in CH<sub>3</sub>CN, 190  $\mu$ L), and the resulting solution was allowed to stir for 5 minutes. The reaction mixture was then extracted 3 times with 1:1 ethyl acetate: diethyl ether, and the excess volatiles were removed from the aqueous layer using a rotary evaporator. To the resulting solution was added a magnetic stirrer and the Hantzsch ester (2 mg, 0.7x10<sup>-3</sup> mmol). The tube was then capped with a septum and subsequently evacuated and refilled with N<sub>2</sub> 5 times. To the tube was added added *fac*-Ir(ppy)<sub>3</sub> (560  $\mu$ M in freshly sparged CH<sub>3</sub>CN, 140  $\mu$ L) and freshly sparged acetonitrile (35  $\mu$ L). The resulting heterogeneous mixture was then stirred rapidly. The mixture was irradiated with a Prolite 30-watt fluorescent light bulb that was placed at a 5 centimeter distance from the microwave tube for 45 minutes. A constant temperature was maintained by placing the microwave tube under a stream of air over the course of the irradiation. The reaction mixture was then extracted three times with 1:1 ethyl acetate:diethyl ether and the excess volatiles were removed from the aqueous layer using a rotary evaporator. The resulting solution was then analyzed directly *via* LC/MS (C18 column (50 x 2.1 mm, 2.6 $\mu$ m), Gradient: 5-95% B over 5 min then hold for 0.5 min, 0.7 ml/min), and the ligation was judged to have proceeded in >95% conversion. Purification *via* reverse-phase HPLC (C18 column (150 x 10 mm, 10 $\mu$ m), Gradient: 5-55% B over 9 min then 55-95%B over 1 min, hold for 1.5 min, then 95-5%B over 0.5 min, hold for 3 min, 5 ml/min), followed by lyophilization yielded **17c** as a free-flowing, white solid that was immediately re-dissolved in H<sub>2</sub>O (1 mL) and stored at -20°C. Concentration analysis by A<sub>280</sub> indicated a 1.3 mg/mL solution (90% isolated yield).

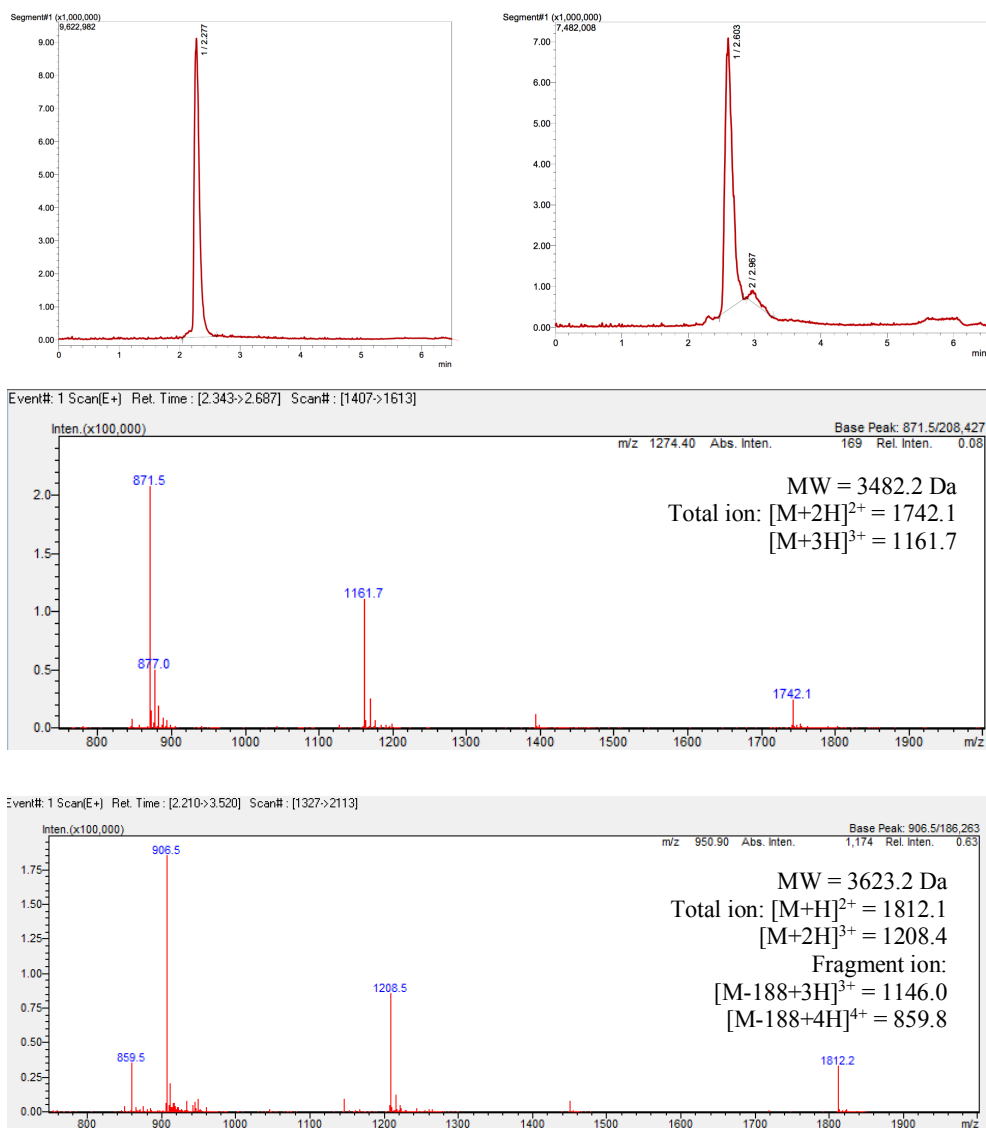

**Figure S47. (A)** Mass trace of parent Glucagon•HCl. **(B)** Mass trace of crude reaction mixture of the labeling/photoreduction of Glucagon with **1i** to form **17c**. **(C)** Mass spectrum of Glucagon (positive ionization mode, TIC from  $T_r=2.34-2.69$  min.) **(D)** Mass spectrum of the crude reaction to form **17c** (positive ionization mode, TIC from  $T_r=2.21-3.52$  min.)

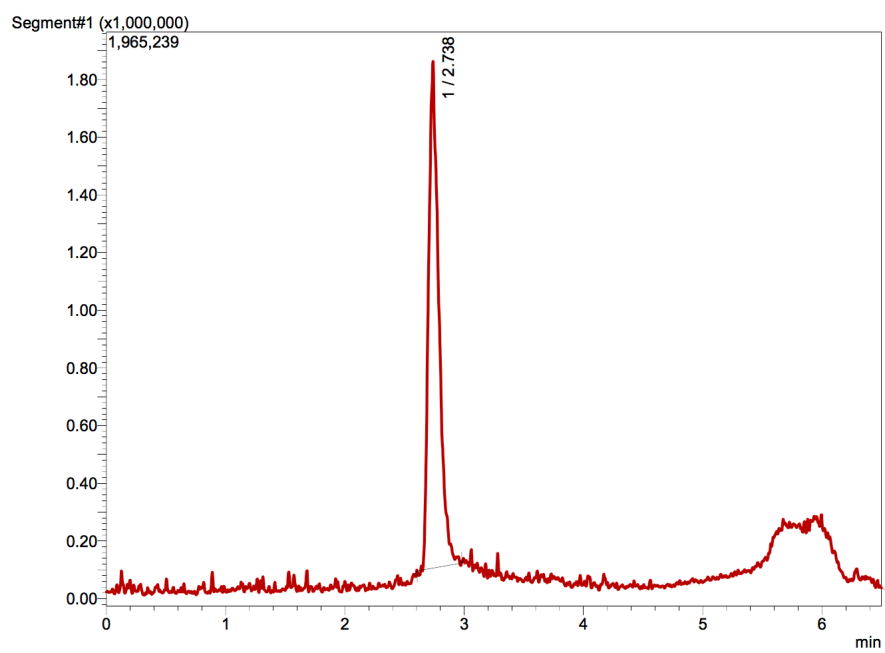

**Figure S48. (A)** Mass-trace of **17c** after purification by HPLC.

## Two-step sequential Methionine Labeling/photochemical Reduction of Glucagon•HCl (17e)

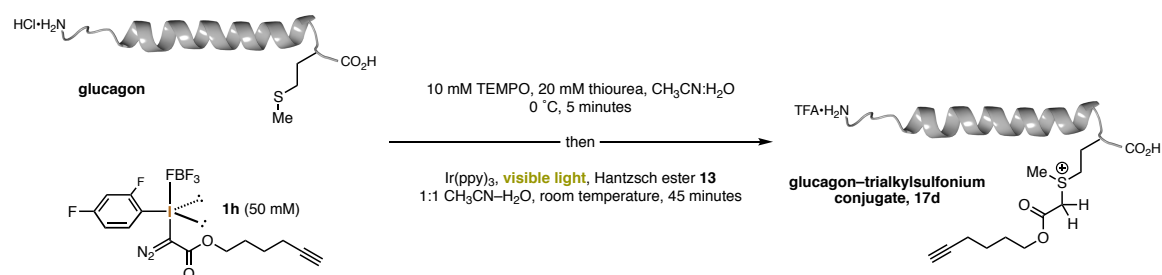

A 5 mL microwave tube equipped with a magnetic stirrer was charged with a solution of glucagon•HCl (3.3 mM in 0.1 M thiourea (aq), 140  $\mu$ L, 1.6 mg). To the vial was added formic acid (100 mM in H<sub>2</sub>O, 35  $\mu$ L), and the resulting solution chilled in an ice bath. To the solution was added TEMPO (33 mM in H<sub>2</sub>O, 175  $\mu$ L), and the solution was stirred rapidly. To the rapidly stirring solution was immediately added **1h** (0.1 M in CH<sub>3</sub>CN, 350  $\mu$ L), and the resulting solution was allowed to stir for 5 minutes. The reaction mixture was then extracted 3 times with 1:1 ethyl acetate: diethyl ether, and the excess volatiles were removed from the aqueous layer using a rotary evaporator. To the resulting solution was added a magnetic stirrer and the Hantzsch ester (4 mg, 1.4x10<sup>-2</sup> mmol). The tube was then capped with a septum and subsequently evacuated and refilled with N<sub>2</sub> 5 times. To the tube was added added *fac*-Ir(ppy)<sub>3</sub> (560  $\mu$ M in freshly sparged CH<sub>3</sub>CN, 280  $\mu$ L) and freshly sparged acetonitrile (70  $\mu$ L). The resulting heterogeneous mixture was then stirred rapidly. The mixture was irradiated with a Prolite 30-watt fluorescent light bulb that was placed at a 5 centimeter distance from the microwave tube for 45 minutes. A constant temperature was maintained by placing the microwave tube under a stream of air over the course of the irradiation. The reaction mixture was then extracted three times with 1:1 ethyl acetate:diethyl ether and the excess volatiles were removed from the aqueous layer using a rotary evaporator. The resulting solution was then analyzed directly *via* LC/MS (C18 column (50 x 2.1 mm, 2.6 $\mu$ m), Gradient: 5-95% B over 5 min then hold for 0.5 min, 0.7 ml/min), and the ligation was judged to have proceeded in >95% conversion. Purification *via* reverse-phase HPLC (C18 column (150 x 10 mm, 10 $\mu$ m), Gradient: 5-55% B over 9 min then 55-95%B over 1min, hold for 1.5 min, then 95-5%B over 0.5 min, hold for 3 min, 5 ml/min), followed by lyophilization yielded **17e** as a free-flowing, white solid that was immediately redissolved in H<sub>2</sub>O (1 mL) and stored at -20°C. Concentration analysis by A<sub>280</sub> indicated a 1.3 mg/mL solution (80% isolated yield). A similar reaction was performed at a lower concentration of peptide using glucagon•HCl (1 mM in 0.1 thiourea(aq), 40  $\mu$ L), TEMPO (33 mM in H<sub>2</sub>O, 40  $\mu$ L), CH<sub>3</sub>CN (20  $\mu$ L) and **1h** (100 mM in CH<sub>3</sub>CN, 100  $\mu$ L) for the labeling reaction; and Hantzsch ester (2 mg), freshly sparged H<sub>2</sub>O (120  $\mu$ L) and *fac*-Ir(ppy)<sub>3</sub> (800  $\mu$ M in freshly sparged CH<sub>3</sub>CN, 200  $\mu$ L) for the photoreduction step. The two-step process was found to have proceeded in >95% conversion by LC/MS. ICP-MS of the solution containing isolated conjugate 17e indicated trace Ir levels of less than 15 ng/mL.

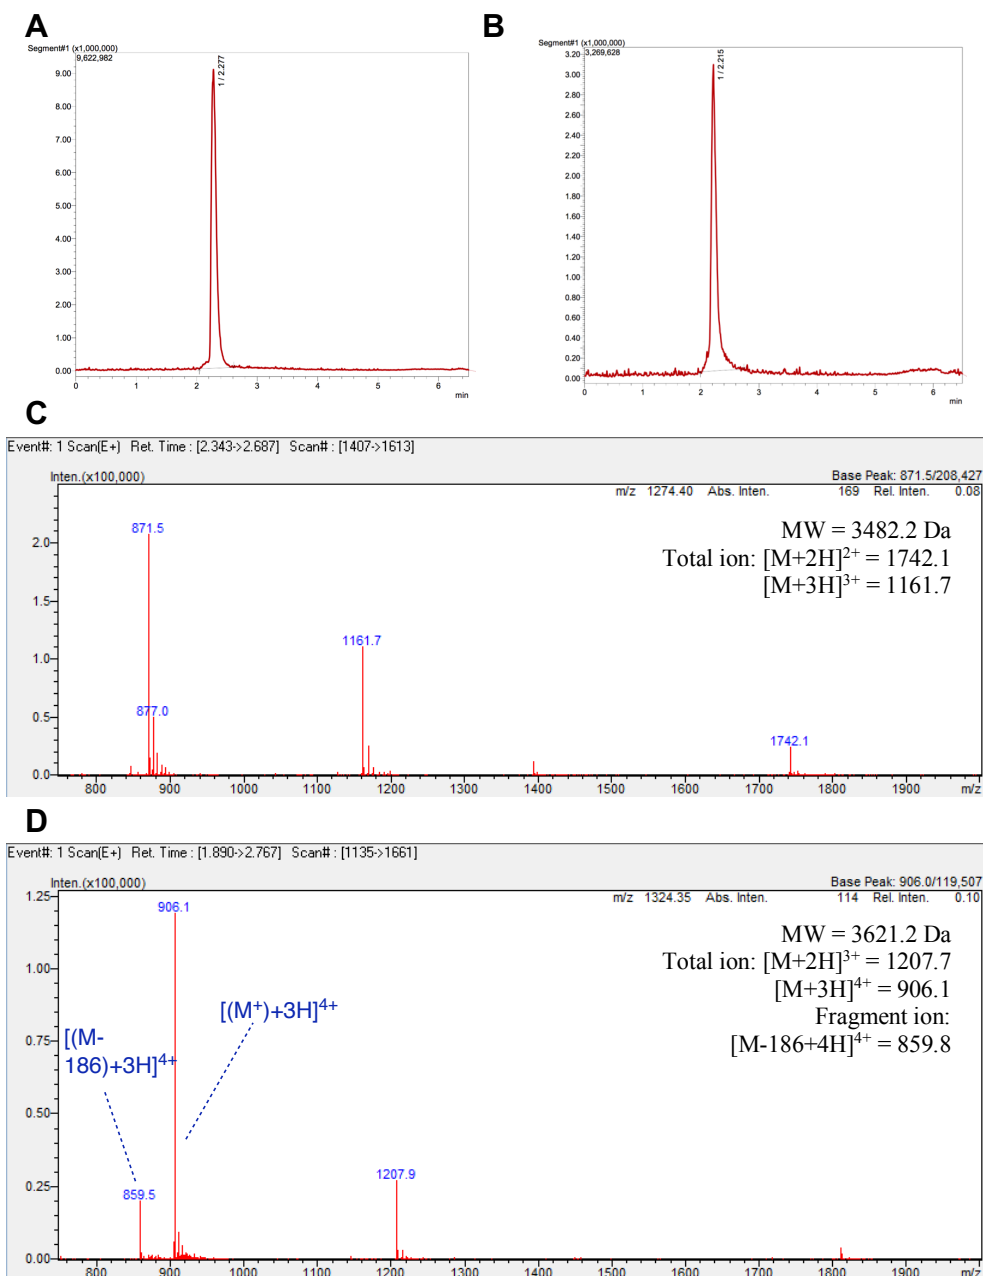

**Figure S49.** (A) Mass trace of parent Glucagon•HCl. (B) Mass trace of crude reaction mixture of the labeling/photoreduction of Glucagon with **1h** to form **17e**. (C) Mass spectrum of Glucagon (positive ionization mode, TIC from  $T_r=2.34-2.69$  min.) (D) Mass spectrum of the crude reaction to form **17e** (positive ionization mode, TIC from  $T_r=1.89-2.77$  min.)



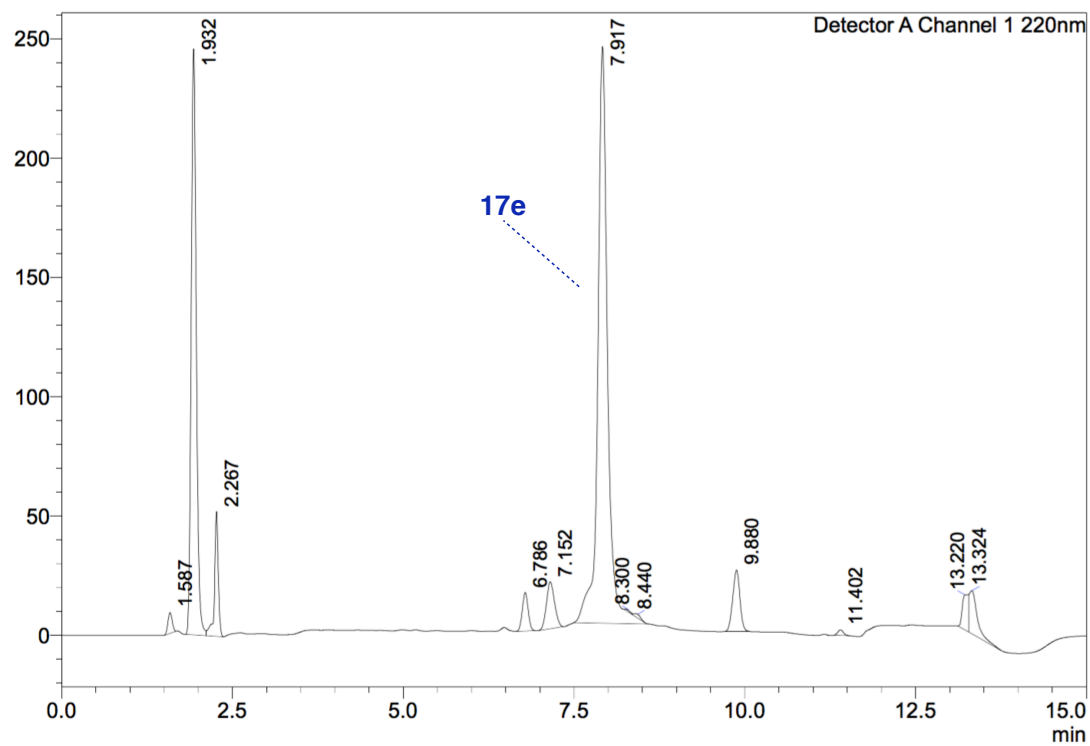

**Figure S50.** HPLC trace of the crude reaction mixture to form **17e**.

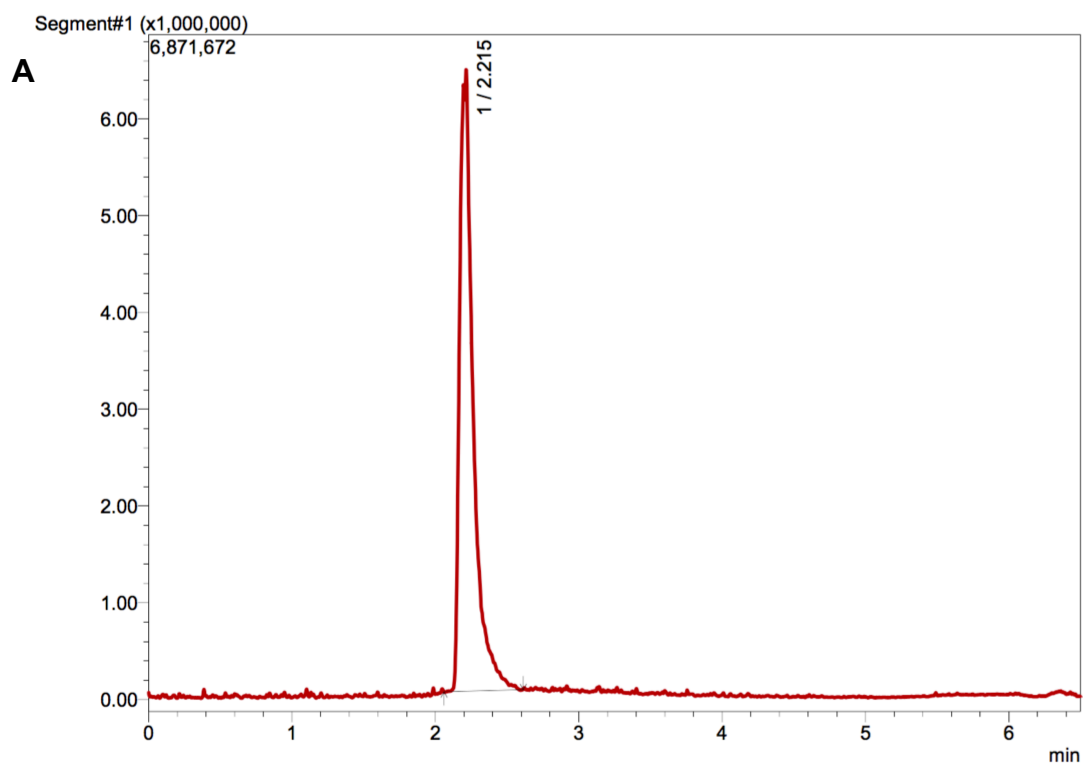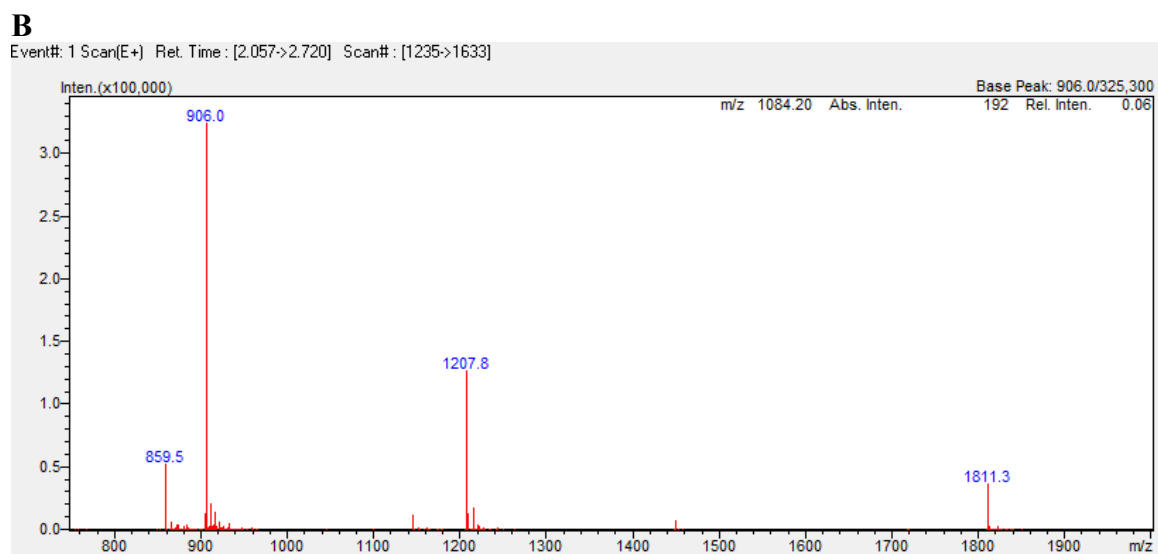

**Figure S51. (A) HPLC trace Purified 17e. (B) Mass spectrum of purified 17e (TIC from 2.06-2.72 min).**

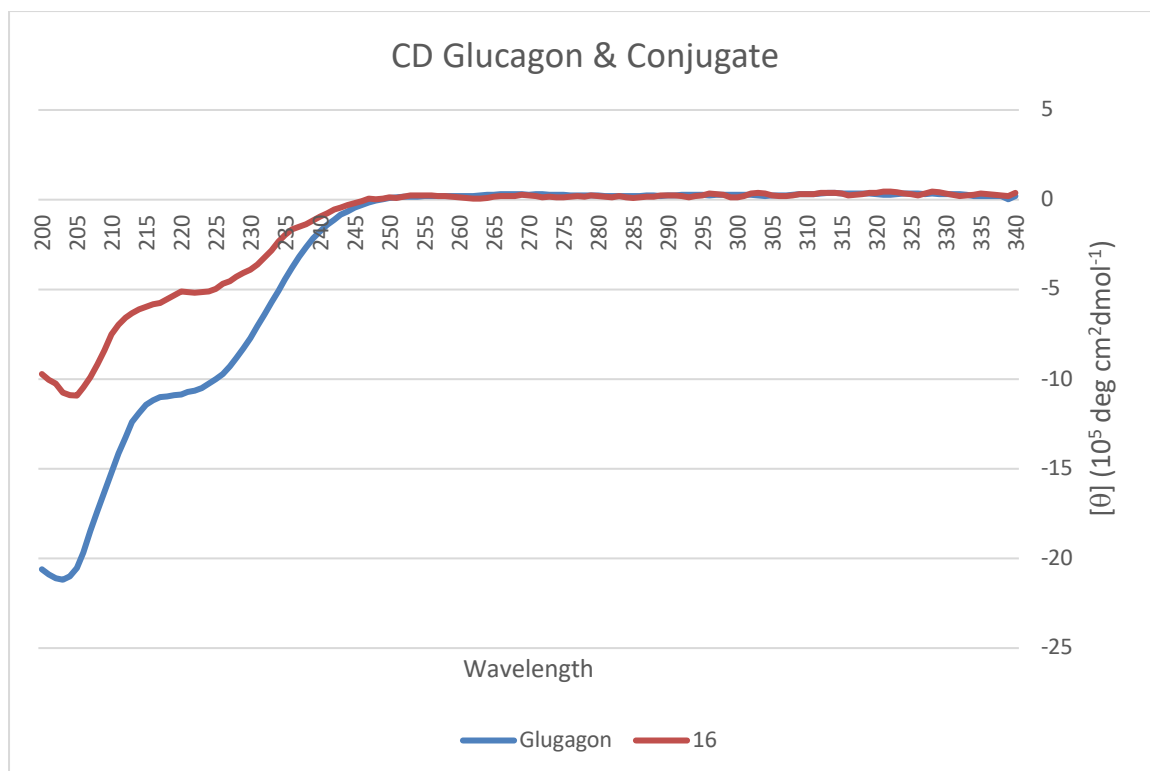

**Figure S52.** CD spectra of Glucagon (blue line) and **17e** (red line) at 50  $\mu$ M in pH 7.4 phosphate buffer. **17e** retains the structural characteristics of parent Glucagon.

## Two-step sequential Methionine-Labelling/photochemical Reduction of Thioredoxin (17d)

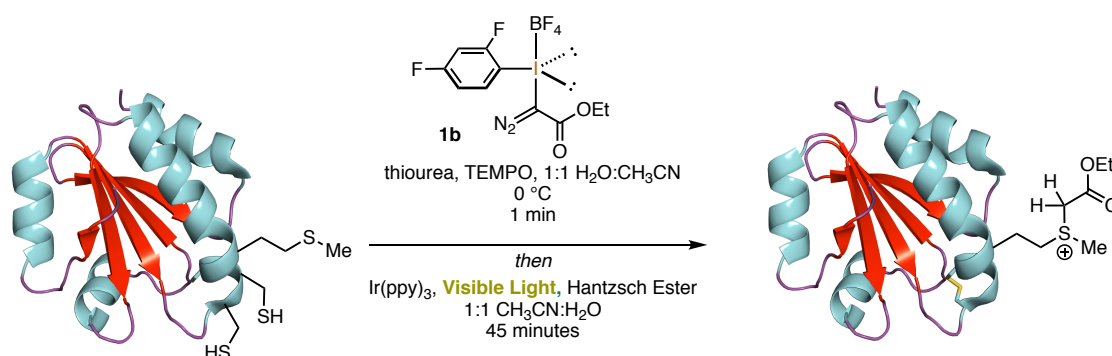

A 2 mL vial equipped with a magnetic stirrer was evacuated and refilled with N<sub>2</sub>. To the vial was added an N<sub>2</sub>-sparged solution containing Thioredoxin (170 μM in 0.1 M thiourea (aq), 20 μL), formic acid (100 mM, 10 μL), and N<sub>2</sub>-sparged H<sub>2</sub>O (50 μL). The resulting solution was chilled in an ice bath. To the chilled solution was added an N<sub>2</sub>-sparged solution containing TEMPO (33 mM in H<sub>2</sub>O, 30 μL), and the resulting solution was stirred vigorously. To the stirring solution was added **1b** (100 mM in CH<sub>3</sub>CN, 50 μL) and the resulting solution stirred for 1 minute. The resulting mixture was then extracted twice with 1:1 diethyl ether:ethyl acetate. The remaining organic volatiles were then removed from the aqueous layer using a rotary evaporator. To the resulting solution was added a magnetic stirrer and the Hantzsch ester (1 mg, 4x10<sup>-3</sup> mmol). The vial was then capped with a septum and subsequently evacuated and refilled with N<sub>2</sub> 5 times. To the vial was added added *fac*-Ir(ppy)<sub>3</sub> (560 μM in freshly sparged CH<sub>3</sub>CN, 80 μL). The resulting heterogeneous mixture was then stirred rapidly. The mixture was irradiated with a Prolite 30-watt fluorescent light bulb that was placed at a 5 centimeter distance from the microwave tube for 45 minutes. A constant temperature was maintained by placing the microwave tube under a stream of air over the course of the irradiation. The reaction mixture was then extracted 3 times with ethyl acetate and the excess volatiles were removed from the aqueous layer using a rotary evaporator. The resulting solution was then analyzed directly *via* LC/MS, (C4 column, Gradient: 5-100% B over 5.2 min then hold for 1 min, then 100-5%B over 1 min, 0.2 ml/min), and was judged to have proceeded in 95% conversion with a (8:1.2:1) label:label+oxidation:double label ratio (**Figure S53**).

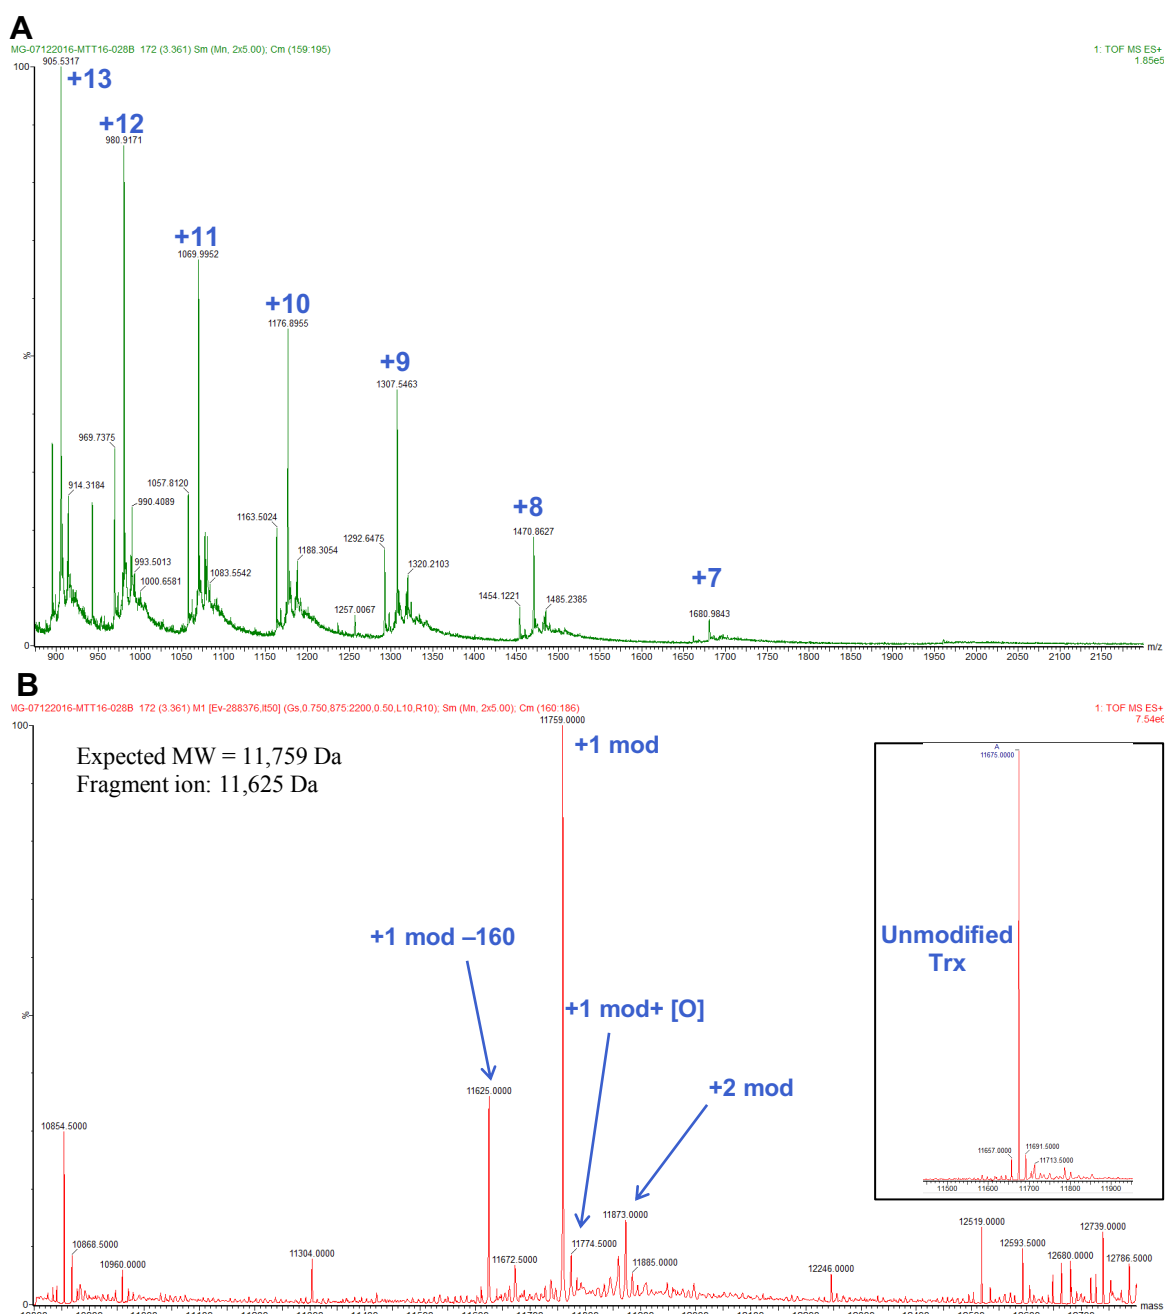

**Figure S53:** (A) Mass spectrum of the crude reaction mixture of the labeling/photoreduction of thioredoxin with **1b** to form **17d**. (B) Deconvoluted mass spectrum of the crude reaction to form **17d**. The insert depicts the deconvoluted mass spectrum of unmodified, reduced, thioredoxin.

## Two-step sequential Methionine-Labeling/photochemical Reduction of Exenatide (17f)

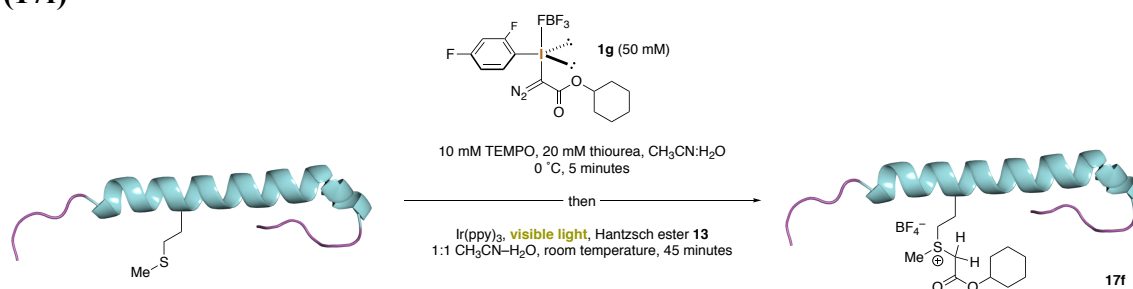

A 5 mL microwave tube equipped with a magnetic stirrer was charged with a solution of exenatide•OAc (3.7 mM in 0.1 M thiourea (aq), 70  $\mu$ L, 1 mg). To the vial was added formic acid (100 mM in H<sub>2</sub>O, 20  $\mu$ L), and the resulting solution chilled in an ice bath. To the solution was added TEMPO (33 mM in H<sub>2</sub>O, 50  $\mu$ L), H<sub>2</sub>O (30  $\mu$ L) and the solution was stirred rapidly. To the rapidly stirring solution was immediately added **1g** (100 mM in CH<sub>3</sub>CN, 170  $\mu$ L), and the resulting solution was allowed to stir for 5 minutes. The reaction mixture was then extracted 3 times with 1:1 ethyl acetate: diethyl ether, and the excess volatiles were removed from the aqueous layer using a rotary evaporator. To the resulting solution was added a magnetic stirrer and the Hantzsch ester (2.6 mg,  $1.0 \times 10^{-5}$  mmol). The tube was then capped with a septum and subsequently evacuated and refilled with N<sub>2</sub> 5 times. To the tube was added *fac*-Ir(ppy)<sub>3</sub> (560  $\mu$ M in freshly sparged CH<sub>3</sub>CN, 200  $\mu$ L) and freshly sparged H<sub>2</sub>O (170  $\mu$ L). The resulting heterogeneous mixture was then stirred rapidly. The mixture was irradiated with a Prolite 30-watt fluorescent light bulb that was placed at a 5 centimeter distance from the microwave tube for 45 minutes. A constant temperature was maintained by placing the microwave tube under a stream of air over the course of the irradiation. The reaction mixture was then extracted three times with 1:1 ethyl acetate:diethyl ether and the excess volatiles were removed from the aqueous layer using a rotary evaporator. The resulting solution was then analyzed directly *via* LC/MS (C18 column (50 x 2.1 mm, 2.6 $\mu$ m), Gradient: 5-95% B over 5 min then hold for 0.5 min, 0.7 ml/min), and the ligation was judged to have proceeded in >95% conversion. Purification *via* reverse-phase HPLC (C18 column (150 x 10 mm, 10 $\mu$ m), Gradient: 5-55% B over 9 min then 55-95%B over 1min, hold for 1.5 min, then 95-5%B over 0.5 min, hold for 3 min, 5 ml/min), followed by lyophilization yielded **17f** as a free-flowing, white solid that was immediately re-dissolved in H<sub>2</sub>O (0.5 mL) and stored at -20°C. Concentration analysis by A<sub>280</sub> indicated a 1.0 mg/mL solution (50% isolated yield).

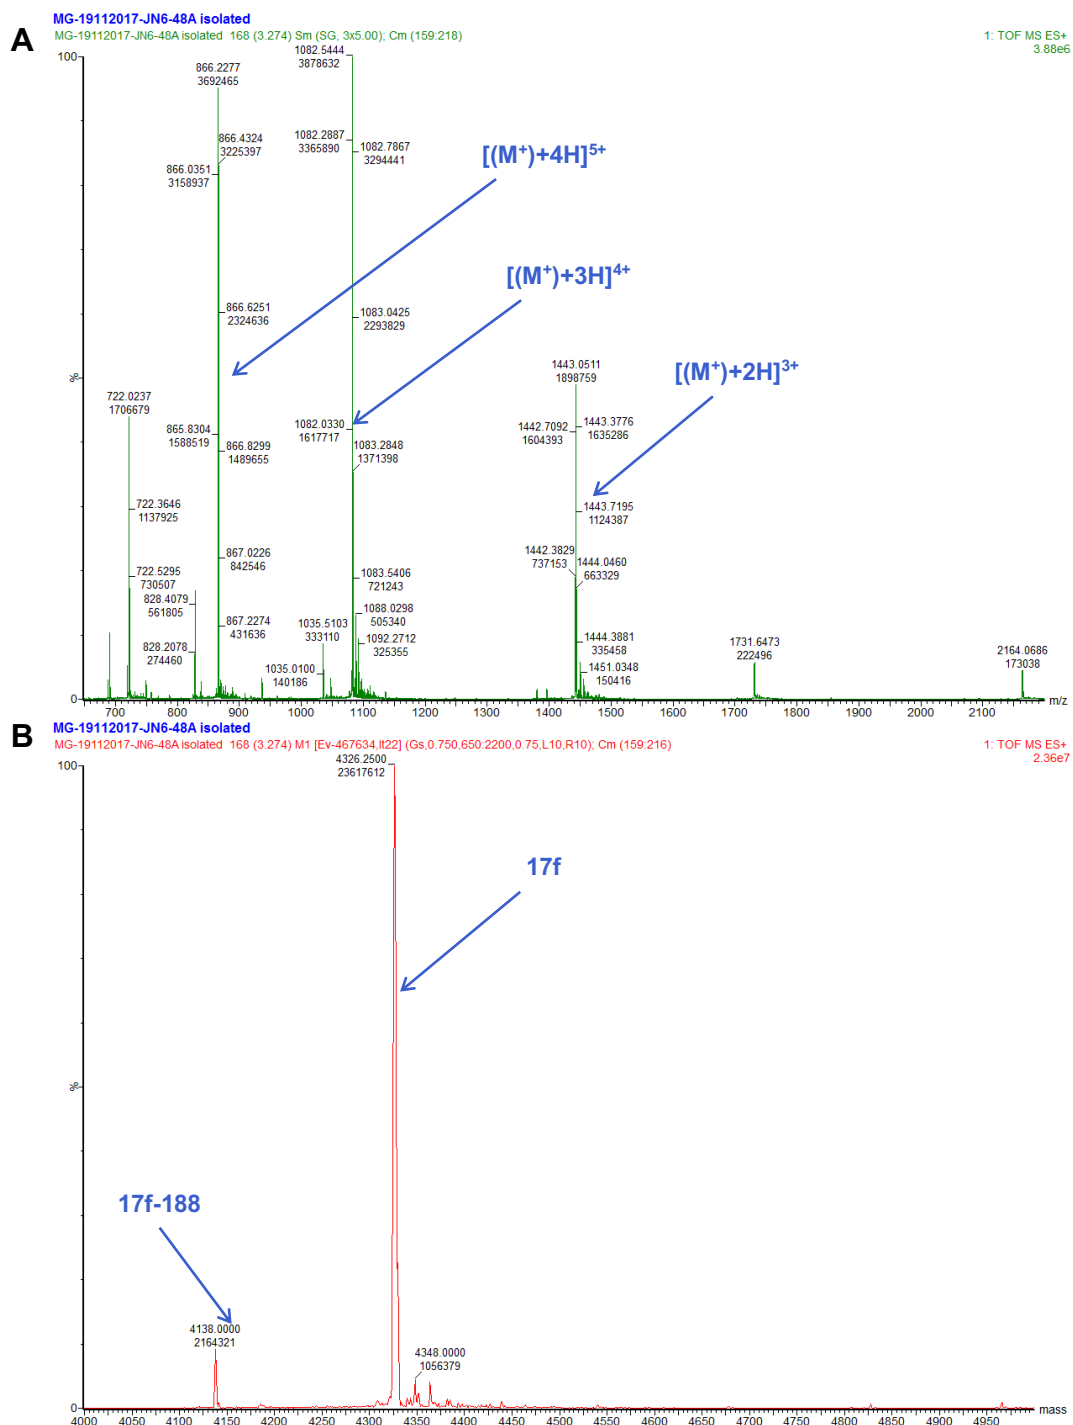

**Figure S54.** (A) Mass spectrum of the crude reaction mixture of the labeling/photoreduction of exenatide with **1g** to form **17f**. (B) Deconvoluted mass spectrum of the crude reaction to form **17f**.

## Two-step sequential Methionine-Labelelling/photochemical Reduction of Ubiquitin (17g)

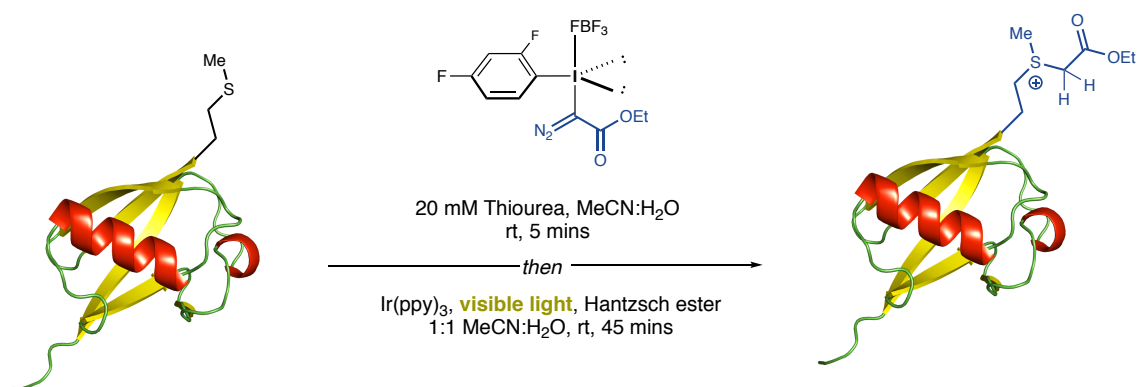

A 2 mL vial equipped with a magnetic stirrer was charged with Ubiquitin (~0.5 mg, ~0.06  $\mu\text{mol}$ ) and evacuated and refilled with N<sub>2</sub> 3 times. To the vial was added formic acid (100 mM in H<sub>2</sub>O, 10  $\mu\text{L}$ ) and thiourea (0.1 M in H<sub>2</sub>O, 40  $\mu\text{L}$ ) and H<sub>2</sub>O (50  $\mu\text{L}$ ). To the rapidly stirring solution was immediately added **1g** (100 mM in CH<sub>3</sub>CN, 100  $\mu\text{L}$ ), and the resulting solution was allowed to stir for 5 minutes. The reaction mixture was then extracted 3 times with 1:1 ethyl acetate: diethyl ether, and the excess volatiles were removed from the aqueous layer using a rotary evaporator. To the resulting solution was added a magnetic stirrer and the Hantzsch ester (2.0 mg,  $1.0 \times 10^{-5}$  mmol). The tube was then capped with a septum and subsequently evacuated and refilled with N<sub>2</sub> 5 times. To the tube was added added *fac*-Ir(ppy)<sub>3</sub> (560  $\mu\text{M}$  in freshly sparged CH<sub>3</sub>CN, 200  $\mu\text{L}$ ). The resulting heterogeneous mixture was then stirred rapidly. The mixture was irradiated with a Prolite 30-watt fluorescent light bulb that was placed at a 5 centimeter distance from the microwave tube for 30 minutes. A constant temperature was maintained by placing the microwave tube under a stream of air over the course of the irradiation. The reaction mixture was then extracted three times with 1:1 ethyl acetate:diethyl ether and the excess volatiles were removed from the aqueous layer using a rotary evaporator. The resulting solution was then analyzed directly *via* LCMS, (C4 column, Gradient: 5-100% B over 5.2 min then hold for 1 min, then 100-5%B over 1 min, 0.2 ml/min) and was judged to have proceeded in approximately 72% conversion over two steps (**Figure S55**).



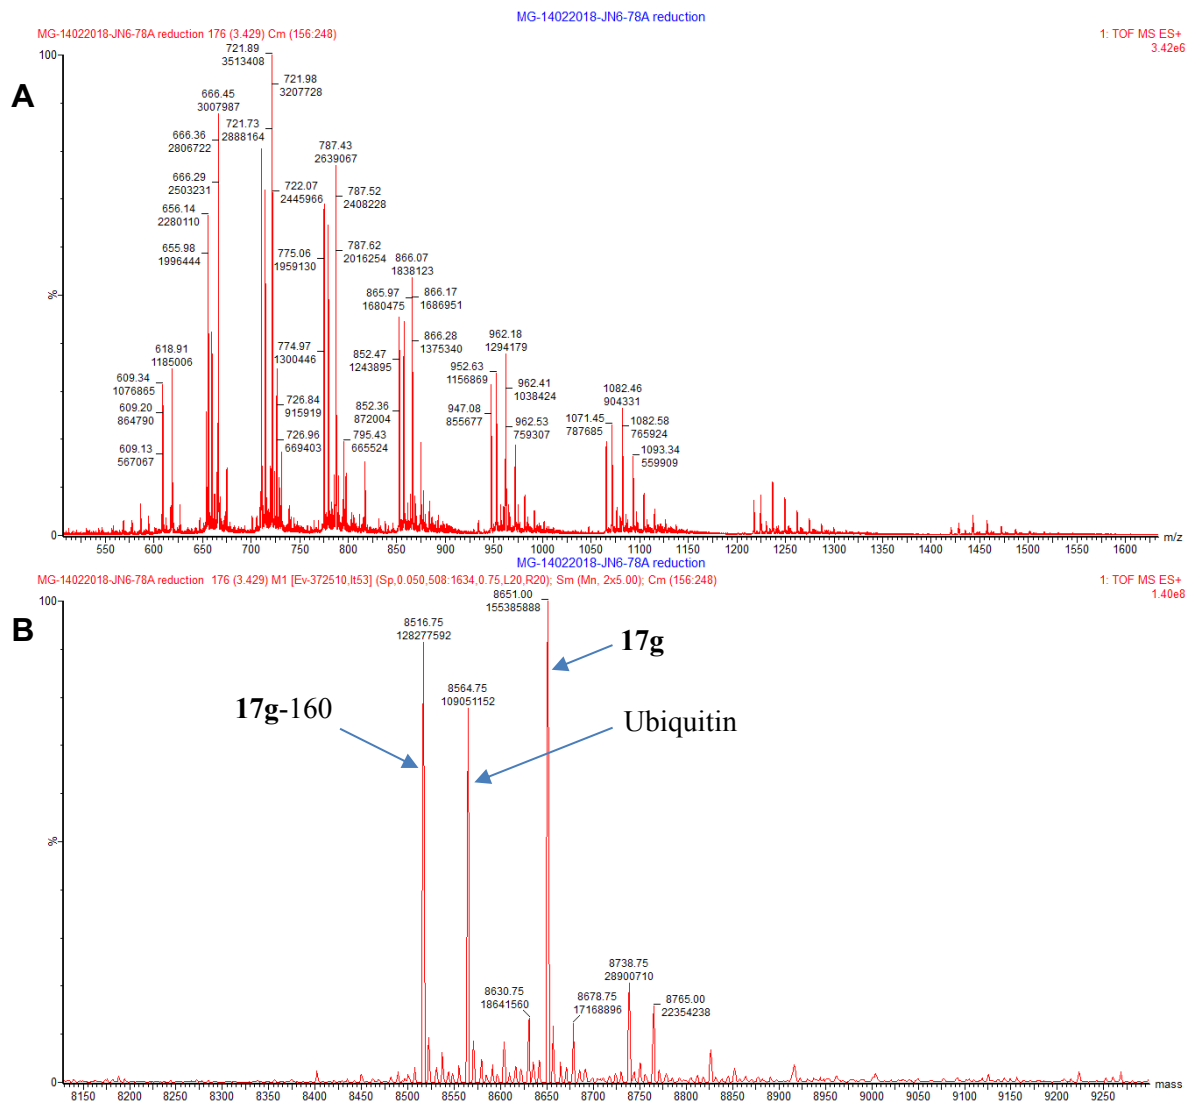

### Large scale two-step sequential Methionine-Labeling/photochemical Reduction of Ubiquitin for isolation (17g)

*\*This larger scale reaction was run to partial completion in order to exemplify the purification of starting Ubiquitin, diazoester conjugate 11 and trialkylsulfonium conjugate 17g.*

A 2 mL vial equipped with a magnetic stirrer was charged with Ubiquitin (~1.0 mg, ~0.12  $\mu\text{mol}$ ) and evacuated and refilled with  $\text{N}_2$  3 times. To the vial was added formic acid (100 mM in  $\text{H}_2\text{O}$ , 25  $\mu\text{L}$ ) and thiourea (0.1 M in  $\text{H}_2\text{O}$ , 100  $\mu\text{L}$ ) and  $\text{H}_2\text{O}$  (125  $\mu\text{L}$ ). To the rapidly stirring solution was immediately added **1g** (100 mM in  $\text{CH}_3\text{CN}$ , 250  $\mu\text{L}$ ), and the resulting solution was allowed to stir for 5 minutes. The reaction mixture was then extracted 3 times with 1:1 ethyl acetate: diethyl ether, and the excess volatiles were removed from the aqueous layer using a rotary evaporator. To the resulting solution was added a magnetic stirrer and the Hantzsch ester (2.0 mg,  $1.0 \times 10^{-5}$  mmol). The tube was then capped with a septum and subsequently evacuated and refilled with  $\text{N}_2$  5 times. To the tube was added added *fac*-Ir(ppy)<sub>3</sub> (560  $\mu\text{M}$  in freshly sparged  $\text{CH}_3\text{CN}$ , 200  $\mu\text{L}$ ). The resulting heterogeneous mixture was then stirred rapidly. The mixture was irradiated with a Prolite 30-watt fluorescent light bulb that was placed at a 5 centimeter distance from the microwave tube for 30 minutes. A constant temperature was maintained by placing the microwave tube under a stream of air over the course of the irradiation. The reaction mixture was then extracted three times with 1:1 ethyl acetate:diethyl ether and the excess volatiles were removed from the aqueous layer using a rotary evaporator. The resulting solution was then purified directly using MonoS 4.6/100 PE column (GE Healthcare) using a NaCl gradient (0-1 M) in 50 mM ammonium acetate pH 4.5 (**Figure S56**).

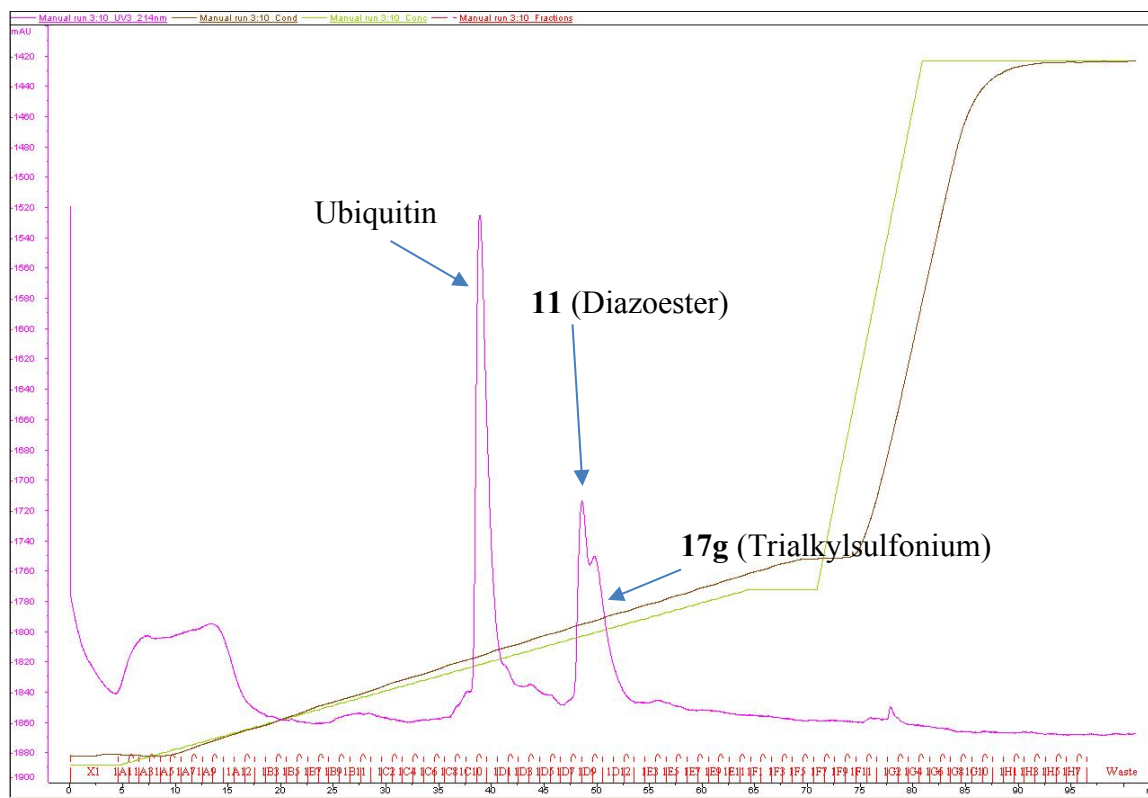

**Figure S56:** FPLC trace of Ubiquitin conjugate **17g**, purified using MonoS 4.6/100 PE column (GE Healthcare) using a NaCl gradient (0-1 M) in 50 mM ammonium acetate pH 4.5. Clear separation of unmodified Ubiquitin and modified conjugate **17g** was achieved due to the differing elution times of the charged species **17g** and uncharged, unmodified ubiquitin using an ion exchange column. Diagnostic fragment ion of [Ub+mod-160] MW = 8516.5 Da was observed in the product peak of **17g**. Hence, this indicates that the diagnostic fragmentation must be an artefact of the mass spectrometer, as proposed, otherwise the uncharged resulting species would have a dramatically different retention time using this ion exchange purification method.

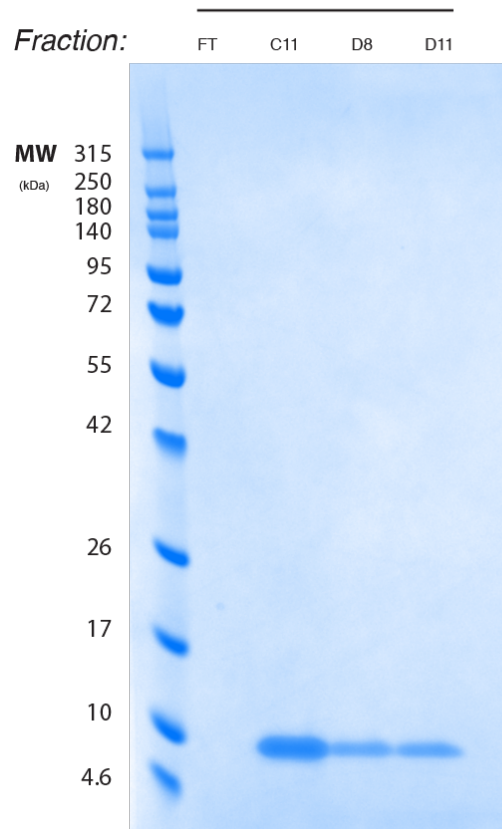

**Figure S57:** Gel of purified Ubiquitin fractions from FPLC purification run with Bolt 4-12% Bis-Tris gels (Thermo Scientific) and were run for 30 min at 165V (constant) using MES buffer (Thermo Scientific). The ladder on the gel is ProSieve QuadColor protein marker (4.6 kDa – 300 kDa; Lonza) and the gel was stained using InstantBlue (Generon)

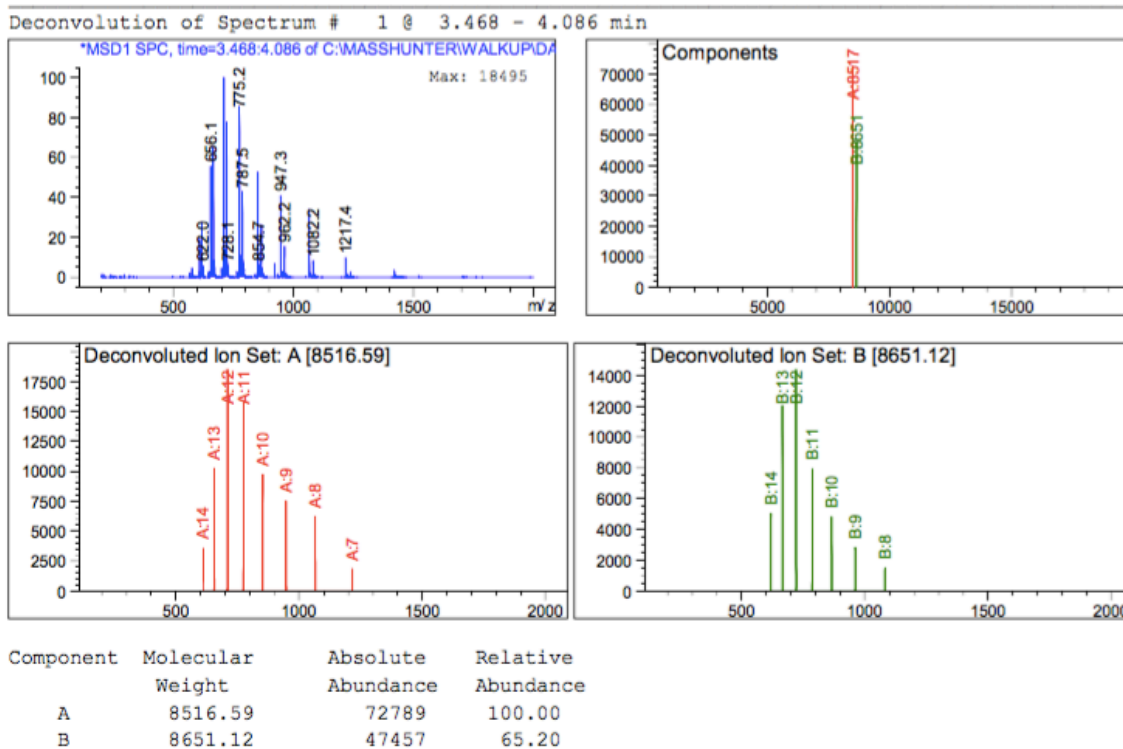

**Figure S58:** Protein LCMS trace and deconvolution of purified **17g** showing only two species present, the total ion of product **17g** (8651 Da) and the fragment ion for **17g**-134 (8517 Da). The fact that **17g** was separated on an IEX column eludes to the fact that the fragment ion must be an artefact of the mass spectrometer, as a real species of this nature would elute at a dramatically different retention time on an ion exchange column.

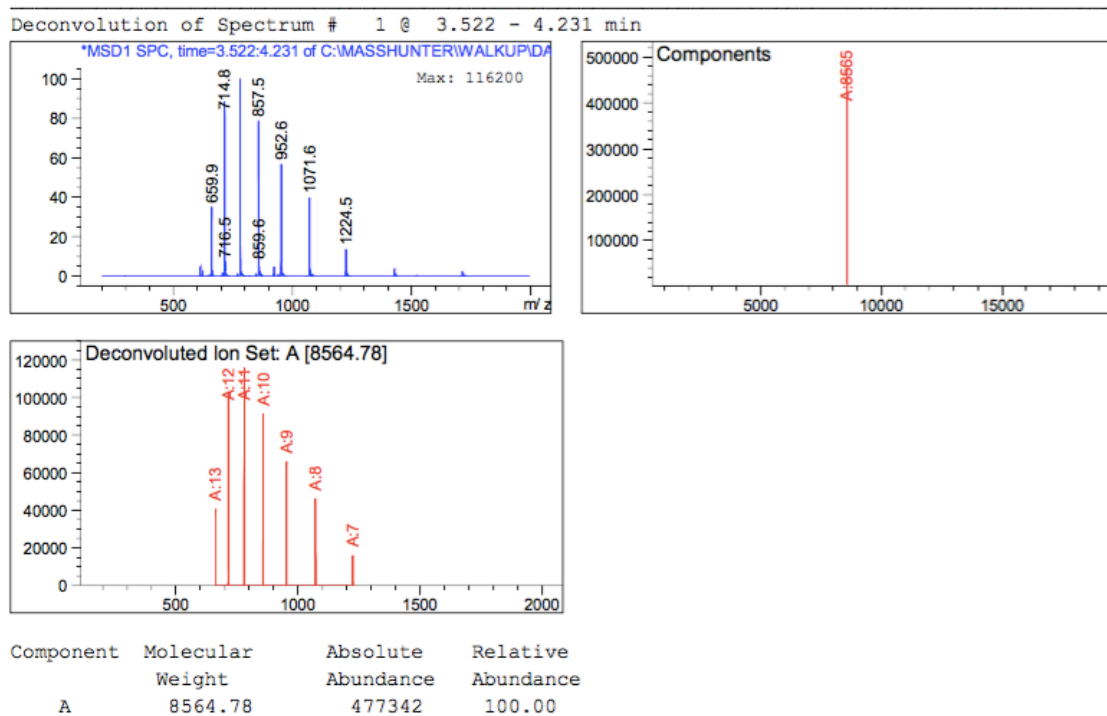

**Figure S59:** Protein LCMS trace and deconvolution of purified parent Ubiquitin

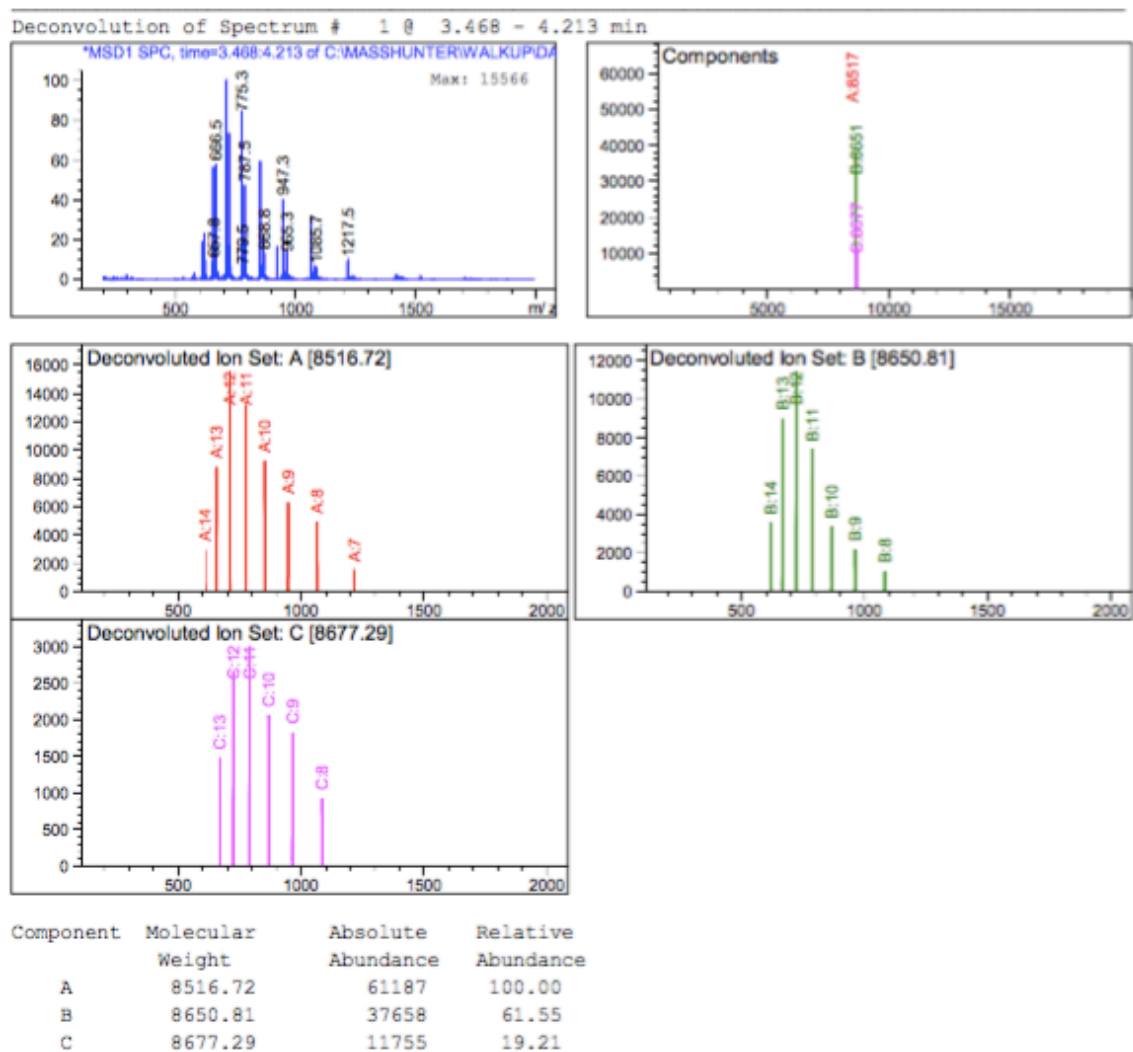

**Figure S60:** Protein LCMS trace of mixed fraction of **11** and **17g** showing the total ion of product **17g** (8651 Da) and the total ion for **11** (8677). Additionally, the same fragment ion for **17g**-134 and **11**-160 (8517 Da) is observed. Again, were this not an artefact of ionization in the mass spectrometer, this uncharged species would elute at a dramatically different retention time on the IEX column.

## Photochemical Alkylation

**Table S4.** Preliminary Optimization of the Photochemical alkylation Process.

| Entry            |  | [Hantzsch] | Photocatalyst                        | Oxidant                                               | Light <sup>a</sup> | T(min) | %conversion | % Free peptide | %oxidized peptide | % CH <sub>2</sub> | % C-alk |
|------------------|--|------------|--------------------------------------|-------------------------------------------------------|--------------------|--------|-------------|----------------|-------------------|-------------------|---------|
| 1 <sup>b,c</sup> |  | 20 mM      | Ir(dtbbp)(ppy) <sub>2</sub> (200 μM) | —                                                     | 30W                | 30     | >95%        | 13             | 0                 | 77                | 10      |
| 2 <sup>b,c</sup> |  | 20 mM      | Ru(bpy) <sub>3</sub> (200 μM)        | K <sub>2</sub> S <sub>2</sub> O <sub>8</sub> (2.5 mM) | 30W                | 30     | 87          | 21             | 5                 | 16                | 15      |
| 3 <sup>b,d</sup> |  | 20 mM      | Ir(dtbbp)(ppy) <sub>2</sub> (50 μM)  | —                                                     | 40W Kessil         | 15     | 95%         | 12             | 0                 | 75                | 13      |
| 4 <sup>b,d</sup> |  | 20 mM      | Ru(bpy) <sub>3</sub> (200 μM)        | K <sub>2</sub> S <sub>2</sub> O <sub>8</sub> (2.5 mM) | 30W                | 30     | 87          | 16             | 7                 | 35                | 13      |
| 5 <sup>b,d</sup> |  | 20 mM      | Ru(bpy) <sub>3</sub> (200 μM)        | —                                                     | 40W Kessil         | 15     | >95%        | 22             | 7                 | 41                | 31      |
| 6 <sup>b,d</sup> |  | 40 mM      | Ru(bpy) <sub>3</sub> (300 μM)        | K <sub>2</sub> S <sub>2</sub> O <sub>8</sub> (2.5 mM) | 40W Kessil         | 15     | >95%        | 17             | trace             | 50                | 32      |
| 7 <sup>b,d</sup> |  | 40 mM      | Ru(bpy) <sub>3</sub> (200 μM)        | K <sub>2</sub> S <sub>2</sub> O <sub>8</sub> (10mM)   | 40W Kessil         | 5      | 94          | 11             | 7                 | 28                | 38      |
| 8 <sup>b,d</sup> |  | 30 mM      | Ru(bpy) <sub>3</sub> (200 μM)        | K <sub>2</sub> S <sub>2</sub> O <sub>8</sub> (10mM)   | 40W Kessil         | 5      | 94          | 0              | 17                | 83                | 0       |

<sup>a</sup>Light placed at 5 cm distance from reaction vessel. <sup>b</sup>Reaction outcome determined by TIC. <sup>c</sup>ethyl ester. <sup>d</sup>cyclohexyl ester

**Table S5.** Optimization of the Photochemical alkylation Process using **S-12** as a Hantzsch ester with enhanced solubility characteristics.

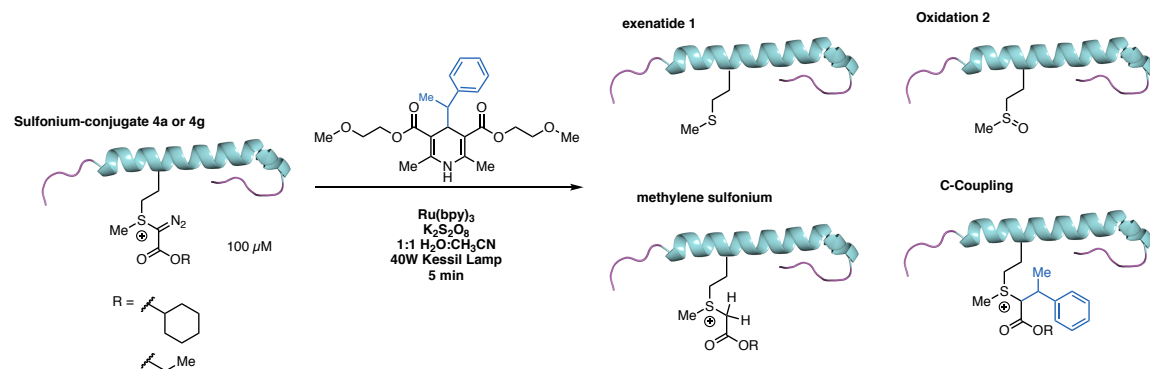

| Entry            | [Hantzsch] | [ $\text{Ru}(\text{bpy})_3$ ] | [ $\text{K}_2\text{S}_2\text{O}_8$ ] | %conversion | % Free peptide | %oxidized peptide | % $\text{CH}_2$ | % C-alk      |
|------------------|------------|-------------------------------|--------------------------------------|-------------|----------------|-------------------|-----------------|--------------|
| 1 <sup>b,c</sup> | 40 mM      | 200 $\mu$ M                   | 10 mM                                | >95         | 12             | 6                 | 41              | <b>25</b>    |
| 2 <sup>b,c</sup> | 40 mM      | —                             | 10 mM                                | 36          | 2              | 4                 | 27              | <b>trace</b> |
| 3 <sup>b,d</sup> | 40 mM      | 500 $\mu$ M                   | 10 mM                                | >95         | 15             | trace             | 29              | <b>44</b>    |
| 4 <sup>b,d</sup> | 40 mM      | 25 $\mu$ M                    | 10 mM                                | 95          | 12             | 5                 | 33              | <b>29</b>    |
| 5 <sup>b,d</sup> | 40 mM      | 500 $\mu$ M                   | 10 mM                                | >95         | 18             | 3                 | 22              | <b>42</b>    |
| 6 <sup>b,d</sup> | 40 mM      | 1 mM                          | 10 mM                                | >95         | 19             | trace             | 19              | <b>48</b>    |
| 7 <sup>b,d</sup> | 40 mM      | 2 mM                          | 10 mM                                | >95         | 16             | trace             | 27              | <b>42</b>    |
| 7 <sup>b,d</sup> | 40 mM      | 1 mM                          | 20 mM                                | >95         | 18             | 18                | 13              | <b>47</b>    |
| 7 <sup>b,d</sup> | 20 mM      | 1 mM                          | 10 mM                                | >95         | 23             | trace             | 10              | <b>53</b>    |

<sup>a</sup>)Light placed at 5 cm distance from reaction vessel. <sup>b</sup>)Reaction outcome determined by TIC. <sup>c</sup>)ethyl ester. <sup>d</sup>)cyclohexyl ester



**Table S6.** Optimization of the Photochemical alkylation Process by systematic variance of substituents on the benzyl-transferring group.

| Entry               |  | [Hantzsch] | [Ru(bpy) <sub>3</sub> ] | [K <sub>2</sub> S <sub>2</sub> O <sub>8</sub> ] | %conversion | % Free peptide | %oxidized peptide | % CH <sub>2</sub> | % C-alk | Alk/CH <sub>2</sub> ratio |
|---------------------|--|------------|-------------------------|-------------------------------------------------|-------------|----------------|-------------------|-------------------|---------|---------------------------|
| 1 <sup>b,c</sup>    |  | 20 mM      | 1 mM                    | 10 mM                                           | >95         | trace          | 0                 | 28                | 72      | 2.6/1                     |
| 2 <sup>b,c</sup>    |  | 10 mM      | 500 μM                  | 10 mM                                           | 36          | 12             | 8                 | 36                | 45      | 1.3/1                     |
| 4 <sup>b,d</sup>    |  | 40 mM      | 1 mM                    | 10 mM                                           | >95%        | 12             | 0                 | 88*               | 0       | -                         |
| 5 <sup>b,d</sup>    |  | 20 mM      | 1 mM                    | 10 mM                                           | >95%        | 13             | 6                 | 68                | 13      | 0.2/1                     |
| 6 <sup>b,d</sup>    |  | 30 mM      | 1 mM                    | 10 mM                                           | >95%        | 18             | 0                 | 62*               | 20      | 0.3/1                     |
| 7 <sup>b,d</sup>    |  | 40 mM      | 500 μM                  | 10 mM                                           | 92%         | 5              | 0                 | 79                | 8       | 0.1/1                     |
| 8 <sup>b,d</sup>    |  | 20 mM      | 1 mM                    | 10 mM                                           | >95%        | Decomposition  |                   |                   |         |                           |
| 9 <sup>b,d</sup>    |  | 40 mM      | 500 μM                  | 10 mM                                           | >95%        | Decomposition  |                   |                   |         |                           |
| 10 <sup>b,d</sup>   |  | 20 mM      | 1 mM                    | 10 mM                                           | >95%        | Decomposition  |                   |                   |         |                           |
| 11 <sup>b,d</sup>   |  | 10 mM      | 500 μM                  | 5 mM                                            | 67%         | 6              | trace             | 16                | 45      | 2.9/1                     |
| 13 <sup>b,d</sup>   |  | 20 mM      | 1 mM                    | 10 mM                                           | >95%        | 5              | 4                 | 36                | 54      | 1.5/1                     |
| 14 <sup>b,d</sup>   |  | 10 mM      | 500 μM                  | 5 mM                                            | >95%        | trace          | 4                 | 43                | 51      | 1.2/1                     |
| 15 <sup>b,d</sup>   |  | 20 mM      | 1 mM                    | 10 mM                                           | >95%        | 8              | trace             | 19                | 72      | 3.2/1                     |
| 16 <sup>b,d,e</sup> |  | 30 mM      | 1 mM                    | 10 mM                                           | >95%        | 3              | trace             | 7                 | 86      | 12/1                      |
| 17 <sup>b,d</sup>   |  | 20 mM      | 1 mM                    | 10 mM                                           | >95%        | 0              | 0                 | 22                | 70      | 3.2/1                     |
| 18 <sup>b,d</sup>   |  | 30 mM      | 1 mM                    | 10 mM                                           | 89%         | 6              | 0                 | 9                 | 72      | 8.0/1                     |
| 19 <sup>b,d</sup>   |  | 30 mM      | 1 mM                    | 10 mM                                           | 53%         | 8              | 3                 | 11                | 32      | 3.0/1                     |
| 20 <sup>b,d</sup>   |  | 20 mM      | 1 mM                    | 10 mM                                           | 71%         | 10             | 4                 | 16                | 37      | 0.8/1                     |

<sup>a</sup>Light placed at 5 cm distance from reaction vessel. <sup>b</sup>Reaction outcome determined by TIC. <sup>c</sup>ethyl ester. <sup>d</sup>cyclohexyl ester <sup>e</sup> Average of 5 runs \* Reduction includes some reduction + ox.

**Table S7.** Control reactions to assist in identifying the role of each reagent.

| Entry          | [Hantzsch] | [Ru(bpy) <sub>3</sub> ] | [K <sub>2</sub> S <sub>2</sub> O <sub>8</sub> ] | Light <sup>a</sup> | %conversion <sup>b</sup> | % Free peptide | %oxidized peptide | % CH <sub>2</sub> | % C-alk   |
|----------------|------------|-------------------------|-------------------------------------------------|--------------------|--------------------------|----------------|-------------------|-------------------|-----------|
| 1 <sup>c</sup> | 30 mM      | 1 mM                    | 10 mM                                           | 40W kessil         | >95                      | 3              | trace             | 7                 | <b>86</b> |
| 2              | 30 mM      | 1 mM                    | —                                               | 40W kessil         | 56                       | 3              | trace             | 44                | <b>4</b>  |
| 3              | 30 mM      | —                       | 10 mM                                           | 40W Kessil         | 25                       | 3              | 7                 | 14                | trace     |
| 4              | 30 mM      | 1 mM                    | 10 mM                                           | dark <sup>d</sup>  | Decomposition            |                |                   |                   |           |

<sup>a</sup>Light placed at 5 cm distance from reaction vessel. <sup>b</sup>Reaction outcome determined by TIC. <sup>c</sup> Values are an average of 5 experiments. <sup>d</sup>reaction was run in a foil-encapsulated vial.

**Table S8.** Control reactions to assist in identifying the role of each reagent. Conditions that form bibenzyl **S-9** would suggest the formation of either of two radical species **S-9A** or **S-9B**.

| Entry | [Ru(bpy) <sub>3</sub> ] | [K <sub>2</sub> S <sub>2</sub> O <sub>8</sub> ] | Light <sup>a</sup> | S-9 Observed? |
|-------|-------------------------|-------------------------------------------------|--------------------|---------------|
| 1     | 1 mM                    | 10 mM                                           | 40W kessil         | Yes           |
| 2     | 1 mM                    | —                                               | 40W kessil         | No            |
| 3     | —                       | —                                               | 40W Kessil         | No            |

<sup>a</sup>Light placed at 5 cm distance from reaction vessel

### General Procedure D: Synthesis of C-4 Substituted Hantzsch esters

A solution of aldehyde (1 eq.), 2-methoxyethyl 3-oxobutanoate (4 eq.) and ammonium acetate (2 eq.) in water (0.5 M in aldehyde) was stirred at reflux under air for 4 hours and cooled to room temperature. The reaction mixture was diluted with EtOAc and the aqueous layer extracted with EtOAc (x 3). The combined organic layers were washed with brine, dried over magnesium sulfate, filtered and evaporated to yield the crude product. The crude product was purified by silica column chromatography to yield the desired Hantzsch ester.

#### Dimethyl 2,6-dimethyl-4-(1-phenylethyl)-1,4-dihydropyridine-3,5-dicarboxylate (S-10)

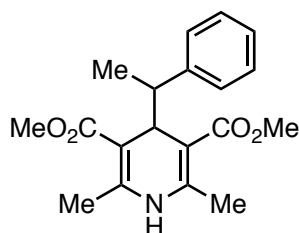

**S-10** was prepared according to General Procedure D using (2-phenyl propanal (2.7 mL, 20 mmol), methyl acetoacetate 9.2 mL, 80 mmol), and ammonium acetate (3.11 g, 40 mmol), with a reaction time of 5 hours. After workup, the crude residue was recrystallized twice from ethyl acetate/40-60 petroleum ether at  $-20^{\circ}\text{C}$  to yield **S-10** (3.17 g, 48%) as colorless crystals.

**MP:** 147–150  $^{\circ}\text{C}$

**$^1\text{H-NMR}$**  (500 MHz, 6:1  $\text{CD}_3\text{CN}:\text{CDCl}_3$ )  $\delta$ : 7.22-7.16 (m, 2H), 7.15-7.10 (m, 1H), 7.09-7.04 (m, 2H), 6.80 (s, br, 1H), 4.13 (d,  $J = 6.1$  Hz, 1H), 3.47 (s, 3H), 3.44 (s, 3H), 2.62 (app quint,  $J = 7.1$ , 1H), 2.18 (s, 3H), 2.16 (s, 3H), 1.09 (d,  $J = 7.2$  Hz, 3H).

**$^{13}\text{C-NMR}$**  (125 MHz, 6:1  $\text{CD}_3\text{CN}:\text{CDCl}_3$ )  $\delta$ : 168.5, 168.3, 146.2 (2C), 144.4, 128.3 (2C), 127.2 (2C), 125.7, 100, 99.6, 50.1, 50.0, 45.8, 40.1, 17.6 (2C), 15.0.

**IR:** 3325, 3092, 3026, 2967, 2939, 1697, 1658, 1636, 1487, 1431, 1341, 1214, 1189, 1102, 1005, 876, 755.

**HRMS-(ESI) $^+$**  (m/z) Found (M+H): 330.1698, Calc'd  $\text{C}_{19}\text{H}_{24}\text{NO}_4$  requires 330.1700.

#### Dimethyl 4-(methoxy(phenyl)methyl)-2,6-dimethyl-1,4-dihydropyridine-3,5-dicarboxylate (S-11)

**S-11** was prepared according to General Procedure D using (2-methoxy-2-phenyl acetaldehyde<sup>14</sup> (0.278 g, 1.86 mmol), methyl acetoacetate 0.80 mL, 7.4 mmol), and ammonium acetate (0.289 g, 3.72 mmol), with a reaction time of 8 hours. After workup, the crude residue was recrystallized once from ethyl acetate/40-60 petroleum ether at  $-20^{\circ}\text{C}$  to yield **S-11** (0.331 g, 52%) as off-white crystals.

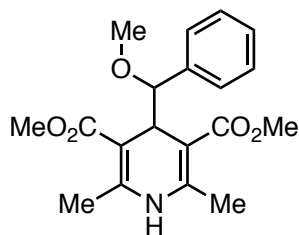

**MP:** 144-145 °C

**<sup>1</sup>H-NMR** (500 MHz, CD<sub>3</sub>CN) δ: 7.27-7.19 (m, 3H), 7.11-7.06 (m, 2H), 6.66 (s, br, 1H), 4.35 (d, *J* = 6.2 Hz, 1H), 3.86 (d, *J* = 6.0 Hz, 1H), 3.57 (s, 3H), 3.42 (s, 3H), 3.10 (s, 3H), 2.12 (s, 3H), 2.09 (s, 3H).

**<sup>13</sup>C-NMR** (125 MHz, CD<sub>3</sub>CN) δ: 168.4, 168.3, 146.3, 146.1, 139.6, 127.7, 127.0, 98.5, 98.0, 86.8, 56.3, 50.2, 49.9, 40.0, 17.4, 17.2.

**IR:** 3337 (br), 3086, 2950, 2816, 1696, 1654, 1486, 1433, 1297, 1208, 1185, 1093, 1022, 761.

**HRMS-(ESI)<sup>+</sup>** (m/z) Found (M+Na): 368.1475, Calc'd C<sub>19</sub>H<sub>23</sub>NO<sub>5</sub>Na requires 368.1468.

**bis(2-methoxyethyl) (*S*)-2,6-dimethyl-4-(1-phenylethyl)-1,4-dihydropyridine-3,5-dicarboxylate (**S-12**)**

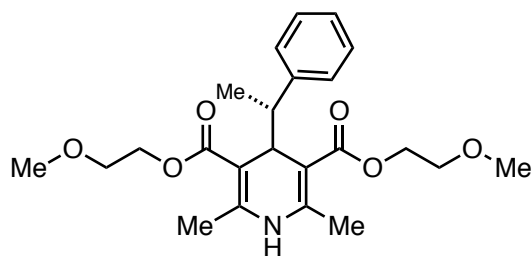

**S-12** was prepared according to General Procedure D using (2-phenyl propanal (1.4 mL, 10 mmol), 2-methoxyethyl acetoacetate (5.9 mL, 40 mmol), and ammonium acetate (1.542 g, 20.0 mmol), with a reaction time of 8 hours. Column chromatography (20-50% ethyl acetate/40-60 petroleum ether) afforded **S-12** (2.287 g, 55%) as a golden syrup.

**<sup>1</sup>H-NMR** (400 MHz, CDCl<sub>3</sub>) δ: 7.24-7.18 (m, 2H), 7.17-7.11 (m, 3H), 5.39 (s, br, 1H), 4.33 (app d, *J* = 4.8 Hz, 1H), 4.20-4.08 (m, 3H), 3.95-3.88 (m, 1H), 3.63 (app t, *J* = 4.9 Hz, 2H), 3.53-3.47 (m, 2H), 3.43 (s, 3H), 3.40 (s, 3H), 2.86-2.77 (m, 1H), 2.22 (s, 3H), 2.21 (s, 3H).

**<sup>13</sup>C-NMR** (125 MHz, CD<sub>3</sub>CN) δ: 168.0, 167.8, 146.4, 146.2, 144.5, 128.4 (2C), 127.2 (2C), 125.7, 99.9, 99.6, 70.4, 70.3, 62.3 (2C), 58.0 (2C), 45.9, 40.1, 17.6, 17.5, 14.9.

**IR:** 3331, 2936, 2878, 1691 (br), 1618, 1488, 1450, 1373, 1302, 1271, 1206, 1087, 1023, 864, 769.

**HRMS-(ESI)<sup>+</sup>** (m/z) Found (M+H): 418.2231, Calc'd C<sub>23</sub>H<sub>32</sub>O<sub>6</sub>N<sub>2</sub> requires 418.2224

**bis(2-methoxyethyl) 4-benzyl-2,6-dimethyl-1,4-dihydropyridine-3,5-dicarboxylate (**S-13**)**

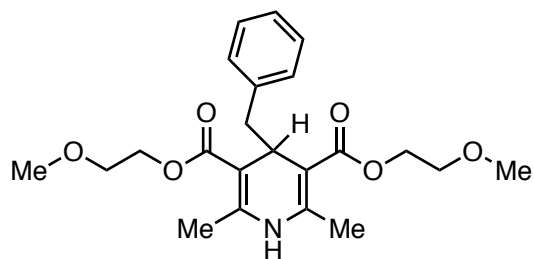

**S-13** was prepared according to General Procedure D using phenylacetaldehyde (1.17 mL, 10 mmol), 2-methoxyethyl acetoacetate (6.0 mL, 40 mmol), and ammonium acetate (1.55 g, 20 mmol), with a reaction time of 3 hours. Column chromatography (20-50% ethyl acetate/40-60 petroleum ether) afforded **S-13** (2.02 g, 50%) as a brown oil of >85% purity. **S-13** can be slowly crystallized from diethyl ether/40-60 petroleum ether at  $-20^{\circ}\text{C}$ .

**MP:** 49–52  $^{\circ}\text{C}$

**$^1\text{H-NMR}$**  (500 MHz,  $\text{CD}_3\text{CN}$ )  $\delta$ : 7.20-7.12 (m, 3H), 7.04-6.99 (m, 2H), 6.67 (s, br, 1H), 4.13-4.06 (m, 3H), 4.03-3.98 (m, 2H), 3.55-3.47 (m, 4H), 3.34 (s, 6H), 2.52 (d,  $J = 2.5$  Hz, 2H), 2.13 (s, 6H).

**$^{13}\text{C-NMR}$**  (125 MHz,  $\text{CD}_3\text{CN}$ )  $\delta$ : 167.4 (2C), 146.7 (2C), 139.4, 130.0 (2C), 127.3 (2C), 125.5, 100.5 (2C), 70.4 (2C), 62.3 (2C), 58.0 (2C), 42.0, 35.5, 17.6 (2C).

**IR:** 3338 (br), 3029, 2924, 2889, 2843, 2818, 1675 (br), 1641, 1617, 1488, 1451, 1381, 1300, 1266, 1202, 1176, 1091, 1058, 1026, 982, 854, 751.

**HRMS-(ESI) $^+$**  (m/z) Found (M+H): 404.2030, Calc'd  $\text{C}_{22}\text{H}_{30}\text{NO}_6$  requires 404.2068

**Bis(2-methoxyethyl) 4-(4-methoxybenzyl)-2,6-dimethyl-1,4-dihydropyridine-3,5-dicarboxylate (S-14)**

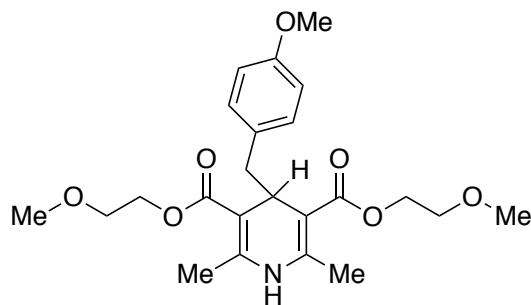

**S-14** was prepared according to General Procedure D using 2-(4-methoxyphenyl) acetaldehyde (0.98 g, 6.5 mmol), 2-methoxyethyl 3-oxobutanoate (3.8 g, 26.0 mmol) and ammonium acetate (1.0 g, 13.0 mmol) in water (15 mL), with a reaction time of 4 hours. Purification by flash silica column chromatography (20-50% EtOAc/40-60 petroleum ether) followed by recrystallization from diethyl ether/hexane afforded **S-14** (0.97 g, 34%) as an off-white solid.

**MP:** 62 - 64  $^{\circ}\text{C}$  (decomp)

**$^1\text{H-NMR}$**  (400 MHz,  $\text{CDCl}_3$ )  $\delta$ : 6.94 (d,  $J = 8.3$  Hz, 2H), 6.72 (d,  $J = 8.3$  Hz, 2H), 5.18 (br. s, 1H), 4.23 – 4.12 (m, 5H), 3.76 (s, 3H), 3.61 – 3.54 (m, 4H), 3.40 (s, 6H), 2.55 (d,  $J = 5.4$  Hz, 2H), 2.16 (s, 6H).

**$^{13}\text{C-NMR}$**  (100 MHz,  $\text{CDCl}_3$ )  $\delta$ : 167.8 (2C), 158.0, 145.8, 131.56 (2C), 131.2 (2C), 112.9 (2C), 101.8 (2C), 70.8 (2C), 62.8 (2C), 59.1 (2C), 55.4, 41.4, 35.7, 19.4 (2C).

**IR:** 3337, 2985, 2941, 2862, 2885, 2838, 1684, 1653, 1625, 1609, 1497, 1470, 1445, 1224, 1212, 1089, 1029, 856, 796, 697.

**HRMS-(ESI)<sup>+</sup> (m/z) Found (M+H):** 434.2176, Calc'd C<sub>23</sub>H<sub>32</sub>O<sub>7</sub>N requires 434.2173.

**R<sub>f</sub>:** 0.3 (50% EtOAc:40-60 Petroleum ether)

**Bis(2-methoxyethyl) 4-(4-bromobenzyl)-2,6-dimethyl-1,4-dihydropyridine-3,5-dicarboxylate (S-15)**

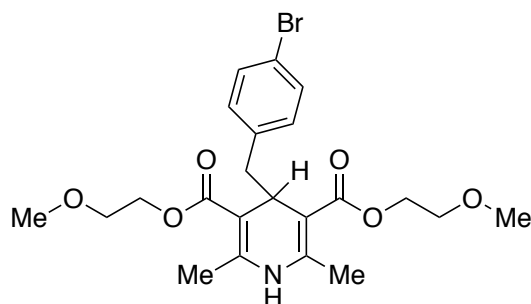

**S-15** was prepared according to General Procedure D using 2-(4-bromophenyl) acetaldehyde (0.80 g, 4.0 mmol), 2-methoxyethyl 3-oxobutanoate (2.34 g, 16.0 mmol) and ammonium acetate (0.62 g, 2.0 mmol) in water (8 mL), with a reaction time of 4 hours. Purification by flash silica column chromatography (10-50% EtOAc/40-60 petroleum ether) followed by recrystallization from diethyl ether/hexane afforded **S-15** (0.47 g, 24%) as an off-white solid.

**MP:** 112 - 114 °C (decomp)

**<sup>1</sup>H-NMR** (400 MHz, CDCl<sub>3</sub>) δ: 7.29 (d, *J* = 8.1 Hz, 2H), 6.91 (d, *J* = 8.1 Hz, 2H), 5.23 (br. s, 1H), 4.23 – 4.15 (m, 5H), 3.62 – 3.51 (m, 4H), 3.40 (s, 6H), 2.57 (d, *J* = 5.4 Hz, 2H), 2.17 (s, 6H)

**<sup>13</sup>C-NMR** (100 MHz, CDCl<sub>3</sub>) δ: 167.6 (2C), 146.0 (2C), 138.6, 132.0 (2C), 130.4 (2C), 119.8, 101.6 (2C), 70.8 (2C), 62.8 (2C), 59.1 (2C), 41.7, 35.6, 19.5 (2C).

**IR:** 3338, 3043, 2981, 2879, 2811, 1671, 1654, 1481, 1373, 1224, 1123, 1024, 1009, 770.

**HRMS-(ESI)<sup>+</sup> (m/z) Found (M+H):** 484.1162, Calc'd C<sub>22</sub>H<sub>29</sub><sup>81</sup>BrO<sub>6</sub>N requires 484.1152.

**R<sub>f</sub>:** 0.4 (50% EtOAc:40-60 Petroleum ether)

**Bis(2-methoxyethyl) 2,6-dimethyl-4-(4-(trifluoromethyl)benzyl)-1,4-dihydropyridine-3,5-dicarboxylate (S-16)**

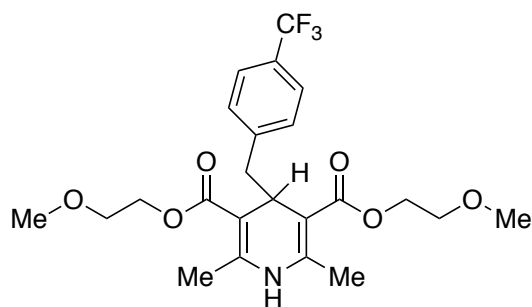

**S-16** was prepared according to General Procedure D using 2-(4-(trifluoromethyl)phenyl) acetaldehyde (0.75 g, 4.0 mmol), 2-methoxyethyl 3-oxobutanoate (2.34 g, 16.0 mmol) and ammonium acetate (0.62 g, 2.0 mmol) in water (8 mL), with a reaction time of 4 hours. Purification by flash silica column chromatography (10-50% EtOAc/40-60 petroleum ether) followed by recrystallization from diethyl ether/hexane afforded **S-16** (0.60 g, 32%) as an off-white solid.

**MP:** 102 - 104 °C (decomp)

**<sup>1</sup>H-NMR** (400 MHz, CDCl<sub>3</sub>) δ: 7.43 (d, *J* = 7.9 Hz, 2H), 7.16 (d, *J* = 7.9 Hz, 2H), 5.33 (br. s, 1H), 4.25 (t, *J* = 5.6 Hz, 1H), 4.21 – 4.07 (m, 4H), 3.60 – 3.50 (m, 4H), 3.39 (s, 6H), 2.67 (d, *J* = 5.6 Hz, 2H), 2.18 (s, 6H).

**<sup>13</sup>C-NMR** (100 MHz, CDCl<sub>3</sub>) δ: 167.5 (2C), 146.0 (2C), 143.9, 130.5 (2C), 128.1 (q, *J* = 32.6 Hz), 124.6 (q, *J* = 270.2 Hz), 124.2 (2C), 101.6 (2C), 70.8 (2C), 62.9 (2C), 59.1 (2C), 42.4, 35.7, 19.4 (2C).

**<sup>19</sup>F-NMR** (376 MHz, CDCl<sub>3</sub>) δ: -64.3.

**IR:** 3339, 2934 (br), 2885 (br), 1673, 1652, 1615, 1477, 1323, 1224, 1165, 1099, 1089, 1026, 1015, 859, 773, 709.

**HRMS-(ESI)<sup>+</sup>** (*m/z*) Found (*M*+*H*): 472.1949, Calc'd C<sub>23</sub>H<sub>29</sub>F<sub>3</sub>O<sub>6</sub>N requires 472.1941

**R<sub>f</sub>:** 0.4 (50% EtOAc:40-60 Petroleum ether)

**bis(2-methoxyethyl) 2,6-dimethyl-4-(3-methylbenzyl)-1,4-dihydropyridine-3,5-dicarboxylate (S-17)**

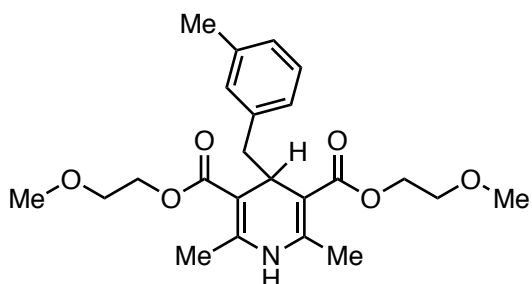

**S-17** was prepared according to General Procedure D using *m*-tolyl acetaldehyde (0.40 g, 3.1 mmol), 2-methoxyethyl acetoacetate (1.8 mL, 12 mmol), and ammonium acetate (0.47 g, 6.0 mmol), with a reaction time of 3 hours. Column chromatography (20-50% ethyl acetate/40-60 petroleum ether) afforded **S-17** (0.365 g, 29%) as a faint yellow, sticky oil of >80% purity that solidified upon standing. **S-17** can be further crystallized from diethyl ether/40-60 petroleum ether at -20°C.

**MP:** 51-52 °C

**<sup>1</sup>H-NMR** (500 MHz, CD<sub>3</sub>CN) δ: 7.07-7.03 (m, 1H), 6.99-6.94 (m, 1H), 6.85 (s, 1H), 6.81-6.77 (m, 1H), 6.69 (s, br, 1H), 4.12-4.06 (m, 3H), 4.02-3.97 (m, 2H), 3.54-3.47 (m, 4H), 3.34 (s, 6H), 2.47 (d, *J* = 5.75 Hz, 2H), 2.27 (s, 3H), 2.14 (s, 6H).

**<sup>13</sup>C-NMR** (125 MHz, CD<sub>3</sub>CN) δ: 167.4 (2C), 146.7 (2C), 139.3, 136.7, 130.8, 127.2, 127.1, 126.1, 100.6, 70.4 (2C), 62.3 (2C), 58.0 (2C), 42.0, 35.5, 20.5, 17.6 (2C).

**IR:** 3344 (br), 2890, 2815, 1688, 1674, 1645, 1620, 1487, 1455, 1383, 1301, 1268, 1207, 1090, 1026, 854, 770.

**HRMS-(ESI)<sup>+</sup>** (m/z) Found (M+H): 418.2229, Calc'd C<sub>23</sub>H<sub>32</sub>NO<sub>6</sub> requires 418.2224.

**bis(2-methoxyethyl) 4-(3-methoxybenzyl)-2,6-dimethyl-1,4-dihydropyridine-3,5-dicarboxylate (S-18)**

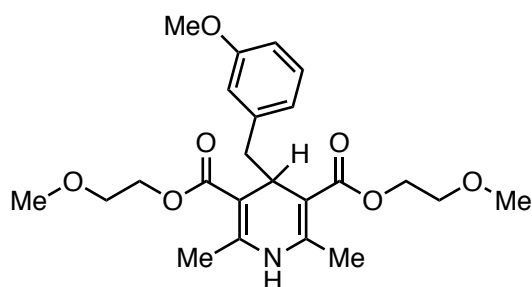

**S-18** was prepared according to General Procedure D using *m*-methoxyphenyl acetaldehyde (0.41 g, 2.8 mmol), 2-methoxyethyl acetoacetate (1.6 mL, 11 mmol), and ammonium acetate (0.43 g, 5.5 mmol), with a reaction time of 3 hours. Column chromatography (20-50% ethyl acetate/40-60 petroleum ether) afforded **S-18** (0.61 g, 51%) as a yellow oil.

**<sup>1</sup>H-NMR** (500 MHz, CD<sub>3</sub>CN) δ: 7.09 (app t, *J* = 7.9 Hz, 1H), 6.73 (s, br, 1H), 6.70 (app ddd, *J* = 1.0, 2.7, 8.2 Hz, 1H), 6.63-6.60 (m, 1H), 6.59-6.57 (m, 1H), 4.12-4.07 (m, 3H), 4.03-3.98 (m, 2H), 3.74 (s, 3H), 3.54-3.47 (m, 4H), 3.33 (s, 6H), 2.49 (d, *J* = 5.9 Hz, 1H), 2.15 (s, 6H).

**<sup>13</sup>C-NMR** (125 MHz, CD<sub>3</sub>CN) δ: 167.4 (2C), 159.0, 146.7 (2C), 141.0, 128.2, 122.4, 115.3, 111.3, 100.7 (2C), 70.4 (2C), 62.3 (2C), 58.0 (2C), 54.7, 42.1, 35.5, 17.6 (2C).

**IR:** 3331 (br), 2931 (br), 1691 (br), 1646, 1600, 1487, 1452, 1380, 1269, 1210, 1103, 1052, 861, 772,

**HRMS-(ESI)<sup>+</sup>** (m/z) Found (M+H): 434.2144, Calc'd C<sub>23</sub>H<sub>32</sub>NO<sub>7</sub> requires 434.2173.

**bis(2-methoxyethyl) 4-(2-fluorobenzyl)-2,6-dimethyl-1,4-dihydropyridine-3,5-dicarboxylate (S-19)**

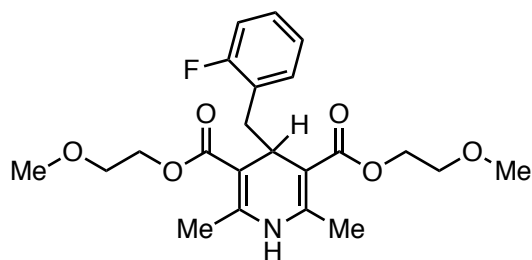



**S-19** was prepared according to General Procedure D using *o*-fluorophenyl acetaldehyde (0.42 g, 3.1 mmol), 2-methoxyethyl acetoacetate (1.8 mL, 12 mmol), and ammonium acetate (0.46 g, 6.0 mmol), with a reaction time of 3 hours. Column chromatography (20-50% ethyl acetate/40-60 petroleum ether) afforded **S-19** (0.48 g, 37%) as a faint yellow, sticky oil of >90% purity that solidified upon standing. **S-19** can be further crystallized from diethyl ether/40-60 petroleum ether at  $-20^{\circ}\text{C}$ .

**MP:** 62–64  $^{\circ}\text{C}$

**$^1\text{H-NMR}$**  (500 MHz,  $\text{CD}_3\text{CN}$ )  $\delta$ : 7.21-7.14 (m, 1H), 7.06-6.92 (m, 3H), 6.70 (s, br, 1H), 4.19 (t,  $J = 5.7$  Hz, 1H), 4.12 (app t,  $J = 5.0$  Hz, 1H), 4.10 (app dd,  $J = 4.4, 5.6$  Hz, 1H), 3.03 (app dd,  $J = 4.3, 5.2$  Hz, 1H), 4.01 (app t,  $J = 4.7$  Hz, 1H), 3.56-3.51 (m, 4H), 3.33 (s, 6H), 2.60 (app dd,  $J = 1.0, 5.6$  Hz, 2H), 2.14 (s, 6H).

**$^{13}\text{C-NMR}$**  (125 MHz,  $\text{CD}_3\text{CN}$ )  $\delta$ : 167.2 (2C), 161.8 (d,  $J = 243$  Hz), 146.9 (2C), 132.8 (d,  $J = 5.3$  Hz), 127.7 (d,  $J = 8.6$  Hz), 126.1 (d,  $J = 16.8$  Hz), 123.2 (d,  $J = 3$  Hz), 114.2 (d,  $J = 22.6$  Hz), 100.2 (2C), 70.4 (2C), 62.4 (2C), 58.0 (2C), 34.5 (2C), 17.6 (2C).

**$^{19}\text{F-NMR}$**  (376 MHz,  $\text{CD}_3\text{CN}$ )  $\delta$  -119.3 (s).

**IR:** 3328, 2954, 2884, 2840, 2821, 1688, 1644, 1619, 1490, 1438, 1379, 1273, 1212, 1078, 1057, 1019, 859, 757.

**HRMS-(ESI) $^+$**  (m/z) Found (M+H): 422.1978, Calc'd  $\text{C}_{22}\text{H}_{29}\text{FNO}_6$  requires 422.1973.

**bis(2-methoxyethyl) 4-(2-methoxybenzyl)-2,6-dimethyl-1,4-dihydropyridine-3,5-dicarboxylate (S-20)**

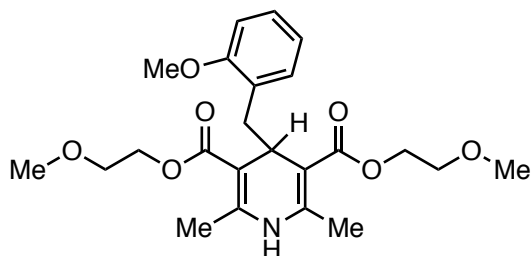

**S-20** was prepared according to General Procedure D using (*o*-methoxyphenyl) acetaldehyde (0.45 g, 3.0 mmol), 2-methoxyethyl acetoacetate (1.8 mL, 12 mmol), and ammonium acetate (0.47 g, 6.0 mmol), with a reaction time of 3 hours. Column chromatography (20-50% ethyl acetate/40-60 petroleum ether) afforded **S-20** (0.651 g, 50%) as a faint yellow solid of >90% purity that solidified upon standing. **S-20** can be further crystallized from diethyl ether/40-60 petroleum ether at  $-20^{\circ}\text{C}$ .

**MP:** 87–79  $^{\circ}\text{C}$

**$^1\text{H-NMR}$**  (500 MHz,  $\text{CD}_3\text{CN}$ )  $\delta$ : 7.15-7.10 (m, 1H), 6.90 (app dd,  $J = 1.7, 7.4$  Hz, 1H), 6.82-6.78 (m, 1H), 6.75 (app dt,  $J = 1.3, 7.4$  Hz, 1H), 6.57 (s, br, 1H), 4.16 (app t,  $J = 5.6$  Hz, 1H), 4.15-4.12 (m, 1H), 4.11 (app dd,  $J = 4.3, 5.5$  Hz, 1H), 4.04 (app dd,  $J = 4.2, 5.3$  Hz, 1H), 4.01 (app t,  $J = 4.7$  Hz, 1H), 3.71 (s, 3H), 3.56-3.51 (m, 4H), 3.34 (s, 6H), 2.57 (d,  $J = 5.6$  Hz, 2H), 2.11 (s, 6H).

**$^{13}\text{C-NMR}$**  (125 MHz,  $\text{CD}_3\text{CN}$ )  $\delta$ : 167.5 (2C), 158.2, 146.4 (2C), 131.7, 127.5, 127.0, 119.3, 109.6, 100.7, 70.5 (2C), 62.3 (2C), 58.0 (2C), 54.9, 35.1, 34.6, 17.6 (2C).

**IR:** 3328 (br), 2991, 2940, 2876, 2842, 2810, 1693, 1652 (br), 1481, 1379, 1323, 1300, 1269, 1243, 1211, 1091, 1057, 867, 750.

**HRMS-(ESI) $^+$**  (m/z) Found (M+Na): 456.1788, Calc'd  $\text{C}_{23}\text{H}_{31}\text{NO}_7\text{Na}$  requires 456.1993.

**bis(2-methoxyethyl)-2,6-dimethyl-4-(2-methylbenzyl)-1,4-dihydropyridine-3,5-dicarboxylate (14b)**

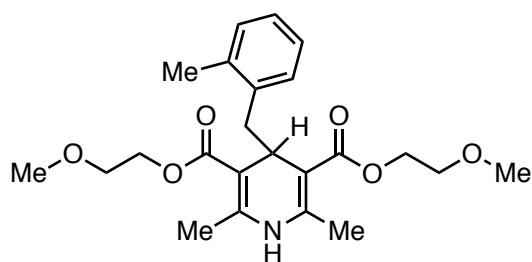

**14b** was prepared according to General Procedure D using *o*-tolyl acetaldehyde (0.81 g, 6.01 mmol), 2-methoxyethyl acetoacetate (3.5 mL, 24.1 mmol), and ammonium acetate (0.94 g, 12.0 mmol), with a reaction time of 3 hours. After workup, the crude residue was recrystallized from 1:1 diethyl ether/40-60 petroleum ether at  $-20^{\circ}\text{C}$  to yield **14b** (1.07 g, 43%) as colorless crystals.

**MP:** 79-80 $^{\circ}\text{C}$

**$^1\text{H-NMR}$**  (500 MHz,  $\text{CD}_3\text{CN}$ )  $\delta$ : 7.09-7.00 (m, 3H), 6.97 (app td,  $J = 1.4, 7.3$  Hz, 1H), 6.67-6.61 (app dd,  $J = 1.4, 7.4$  Hz, 1H), 4.16 (t,  $J = 6.9$  Hz, 1H), 4.03 (app dd,  $J = 4.8, 5.8$  Hz, 1H), 4.07 (app dd,  $J = 4.4, 5.9$  Hz, 1H), 3.81 (app dd,  $J = 4.1, 5.1$  Hz, 1H), 3.79 (app t,  $J = 5$  Hz, 1H), 3.5-3.42 (m, 4H), 3.31 (s, 6H), 2.52 (d,  $J = 7$  Hz, 2H), 2.35 (s, 3H), 2.24 (s, 6H).

**$^{13}\text{C-NMR}$**  (125 MHz,  $\text{CD}_3\text{CN}$ )  $\delta$ : 167.3 (2C), 146.6 (2C), 137.2 (2C), 131.1, 129.5, 125.7, 124.8, 101.2(2C), 70.3 (2C), 62.3(2C), 58.0, 39.1, 33.5, 18.6, 17.7 (2C)

**IR:** 3331 (br), 3076, 2896 (br), 2820, 1692, 1641, 1619, 1486, 1455, 1379, 1309, 1265, 1202, 1104, 1086, 1020, 744.

**HRMS-(ESI) $^+$**  (m/z) Found (M+H): 418.2232, Calc'd  $\text{C}_{23}\text{H}_{32}\text{O}_6\text{N}_2$  requires 418.2224.

**Bis(2-methoxyethyl) 2,6-dimethyl-4-(2,4,6-trimethylbenzyl)-1,4-dihydropyridine-3,5-dicarboxylate, S-21**

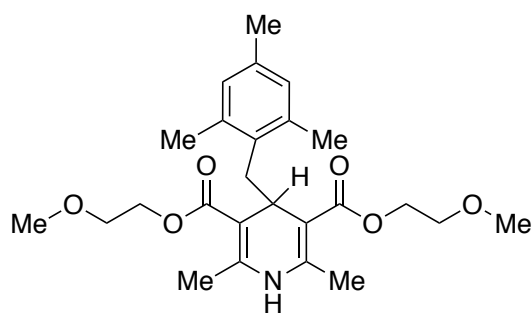

**S-21** was prepared according to General Procedure D using 2-mesitylacetaldehyde (0.32 g, 2 mmol), 2-methoxyethyl 3-oxobutanoate (1.17 g, 8 mmol) and ammonium acetate (0.31 g, 4 mmol) in water (4 mL), with a reaction time of 6 hours. Purification by flash silica column chromatography (10-50% EtOAc/40-60 petroleum ether) followed by recrystallization from diethyl ether/EtOAc/hexane afforded **S-21** (0.16 g, 18%) as an off-white solid.

**MP:** 110 °C (decomp)

**<sup>1</sup>H-NMR** (400 MHz, CDCl<sub>3</sub>) δ: 6.75 (s, 2H), 5.71 (br. s, 1H), 4.34 (t, *J* = 7.9 Hz, 1H), 4.06 (dt, *J* = 4.8, 12.0 Hz, 2H), 3.82 (dt, *J* = 4.8, 12.0 Hz, 2H), 3.48 (t, *J* = 4.8 Hz, 4H), 3.36 (s, 6H), 2.66 (d, *J* = 7.9 Hz, 2H), 2.31 – 2.28 (m, 12H), 2.19 (s, 3H).

**<sup>13</sup>C-NMR** (100 MHz, CDCl<sub>3</sub>) δ: 167.8 (2C), 145.3 (2C), 137.8 (1C or 2C), 135.0 (1C or 2C), 132.2 (1C or 2C), 128.7 (2C), 103.4 (2C), 70.6 (2C), 62.7 (2C), 59.0 (2C), 35.2 (1C), 32.7 (1C), 20.9 (1C), 20.1 (2C), 19.6 (2C).

**IR:** 3303, 2912 (br), 2806, 1701, 1690, 1619, 1491, 1305, 1266, 1198, 1084, 1058, 1017, 847, 773, 766, 721.

**HRMS-(ESI)<sup>+</sup>** (m/z) Found (M+H): 446.2515, Calc'd C<sub>25</sub>H<sub>36</sub>O<sub>6</sub>N requires 446.2537.

**R<sub>f</sub>:** 0.4 (50% EtOAc:40-60 Petroleum ether)

**Bis(2-methoxyethyl) 2,6-dimethyl-4-(2-(trifluoromethyl)benzyl)-1,4-dihydropyridine-3,5-dicarboxylate (S-22)**

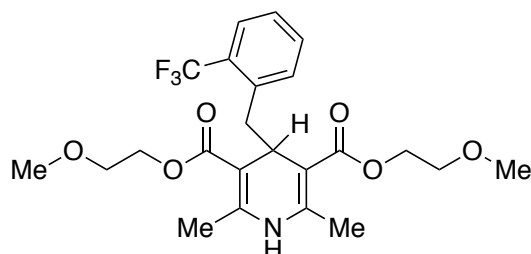

**S-22** was prepared according to General Procedure D using 2-(2-(trifluoromethyl)phenyl)acetaldehyde (0.38 g, 2 mmol), 2-methoxyethyl 3-oxobutanoate (1.17 g, 8 mmol) and ammonium acetate (0.31 g, 4 mmol) in water (4 mL), with a reaction time of 6 hours. Purification by flash silica column chromatography (10-50% EtOAc/40-60 petroleum ether) followed by recrystallization from diethyl ether/hexane afforded **S-22** (0.35 g, 37%) as an off-white solid.

**MP:** 76 °C (decomp)

**<sup>1</sup>H-NMR** (400 MHz, CDCl<sub>3</sub>) δ: 7.56 (d, *J* = 7.6 Hz, 1H), 7.38 (t, *J* = 7.6 Hz, 1H), 7.23 (t, *J* = 7.6 Hz, 2H), 5.85 (br. s, 1H), 4.36 (t, *J* = 7.3 Hz, 1H), 4.13 = 4.06 (m, 2H), 3.91 – 3.84 (m, 2H), 3.53 – 3.44 (m, 4H), 3.36 (s, 6H), 2.76 (d, *J* = 7.3 Hz, 2H), 2.32 (s, 6H).

**<sup>13</sup>C-NMR** (100 MHz, CDCl<sub>3</sub>) δ: 167.5 (2C), 146.1 (2C), 137.9, 133.5, 130.8, 129.14 (q, *J* = 30.0 Hz), 125.9, 125.6 (q, *J* = 5.7 Hz), 124.8 (q, *J* = 275.1 Hz), 102.5 (2C), 70.5 (2C), 62.7 (2C), 59.0 (2C), 38.4, 34.9, 19.6 (2C).

**<sup>19</sup>F-NMR** (376 MHz, CDCl<sub>3</sub>) δ: -60.9.

**IR:** 3327, 2928 (br), 2821, 1691, 1639, 1617, 1489, 1310, 1265, 1206, 1206, 1157, 1112, 1089, 1057, 1032, 771, 744.

**HRMS-(ESI)<sup>+</sup>** (m/z) Found (M+H): 472.1925, Calc'd C<sub>23</sub>H<sub>29</sub>F<sub>3</sub>O<sub>6</sub>N requires 472.1941.

**R<sub>f</sub>:** 0.3 (50% EtOAc:40-60 Petroleum ether)

**Bis(2-methoxyethyl) 4-(2-bromobenzyl)-2,6-dimethyl-1,4-dihydropyridine-3,5-dicarboxylate (S-23)**

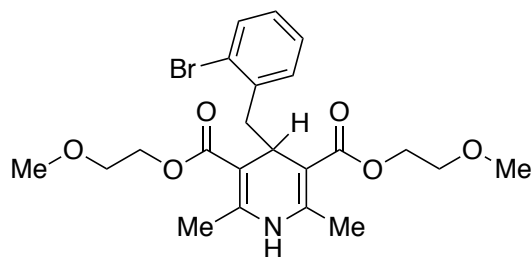

**S-23** was prepared according to General Procedure D using 2-(2-bromophenyl)acetaldehyde (0.40 g, 2 mmol), 2-methoxyethyl 3-oxobutanoate (1.17 g, 8 mmol) and ammonium acetate (0.31 g, 4 mmol) in water (4 mL), with a reaction time of 5 hours. Purification by flash silica column chromatography (10-50% EtOAc/40-60 petroleum ether) followed by recrystallization from diethyl ether/hexane afforded **S-23** (0.36 g, 37%) as an off-white solid.

**MP:** 68 - 70 °C (decomp)

**<sup>1</sup>H-NMR** (400 MHz, CDCl<sub>3</sub>) δ: 7.45 (m, 1H), 7.12 (m, 1H), 7.04 (dd, *J* = 1.6, 7.7 Hz, 1H), 6.99 (td, *J* = 1.6, 7.7 Hz, 1H), 5.56 (br. s, 1H), 4.38 (t, *J* = 6.1 Hz, 1H), 4.20 – 4.13 (m, 2H), 4.05 – 3.99 (m, 2H), 3.57 (t, *J* = 5.0 Hz, 4H), 3.39 (s, 6H), 2.80 (d, *J* = 6.1 Hz, 2H), 2.24 (s, 6H).

**<sup>13</sup>C-NMR** (100 MHz, CDCl<sub>3</sub>) δ: 167.6 (2C), 146.2 (2C), 138.8, 132.7, 132.3, 127.5, 126.4, 125.8, 101.8 (2C), 70.8 (2C), 62.9 (2C), 59.1 (2C), 41.2, 34.3, 19.6 (2C).

**IR:** 3337, 2923 (br), 2890, 2812, 1687, 1635, 1616, 1486, 1471, 1263, 1200, 1089, 1024, 760, 751.

**HRMS**-(ESI)<sup>+</sup> (*m/z*) Found (*M*+*H*): 484.1140, Calc'd C<sub>22</sub>H<sub>29</sub><sup>81</sup>BrO<sub>6</sub>N requires 484.1152.

**R<sub>f</sub>:** 0.3 (50% EtOAc:40-60 Petroleum ether)

## Photochemical Alkylation Procedure of Exenatide Derivative **4g**

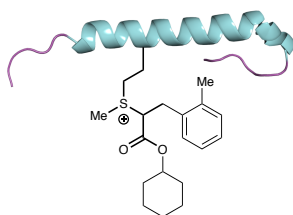

A 5 mL microwave tube was charged with a solution of aqueous, unpurified conjugate **4g** (400  $\mu\text{M}$ , 50  $\mu\text{L}$ ). To the resulting solution was added a magnetic stirrer and Hantzsch ester **14b** (2.5 mg,  $6.0 \times 10^{-3}$  mmol, final sol'n conc = 30 mM). The tube was then capped with a septum and subsequently evacuated and refilled with  $\text{N}_2$  5 times. To the tube was added added  $[\text{Ru}(\text{bpy})_3]^{2+}\text{Cl}_2 \cdot 6\text{H}_2\text{O}$  (5 mM in 3:1  $\text{CH}_3\text{CN}:\text{H}_2\text{O}$ , freshly sparged w/  $\text{N}_2$ , 40  $\mu\text{L}$ , final conc = 1 mM), freshly sparged  $\text{CH}_3\text{CN}$  (70  $\mu\text{l}$ ), and freshly sparged  $\text{H}_2\text{O}$  (20  $\mu\text{L}$ ). To this resulting mixture was added  $\text{K}_2\text{S}_2\text{O}_8$  (100 mM in  $\text{H}_2\text{O}$ , 20  $\mu\text{L}$ , final conc = 10 mM), and the mixture was immediately\*\* irradiated with a Kessil 40-watt light bulb that was placed at a 5 centimeter distance from the microwave tube for 5 minutes. A constant temperature was maintained by placing the microwave tube under a stream of air over the course of the irradiation. The reaction mixture was then extracted twice with 1:1 ethyl acetate:diethyl ether and the excess volatiles were removed from the aqueous layer using a rotary evaporator. The resulting solution was then analyzed directly *via* LC/MS (C18 column (50 x 2.1 mm, 2.6 $\mu\text{m}$ ), Gradient: 5-95% B over 5 min then hold for 0.5 min, 0.7 ml/min), and the ligation was judged to have proceeded in >95% conversion. The resulting solution was then analyzed directly *via* LC/MS, (C4 column, Gradient: 5-100% B over 5.2 min then hold for 1 min, then 100-5%B over 1 min, 0.2 ml/min). The reaction was repeated 5 times by two different coauthors, and was found to have converted to alkylated conjugate **18a** in an average of 86% (range from 82-90%) over the 5 runs.

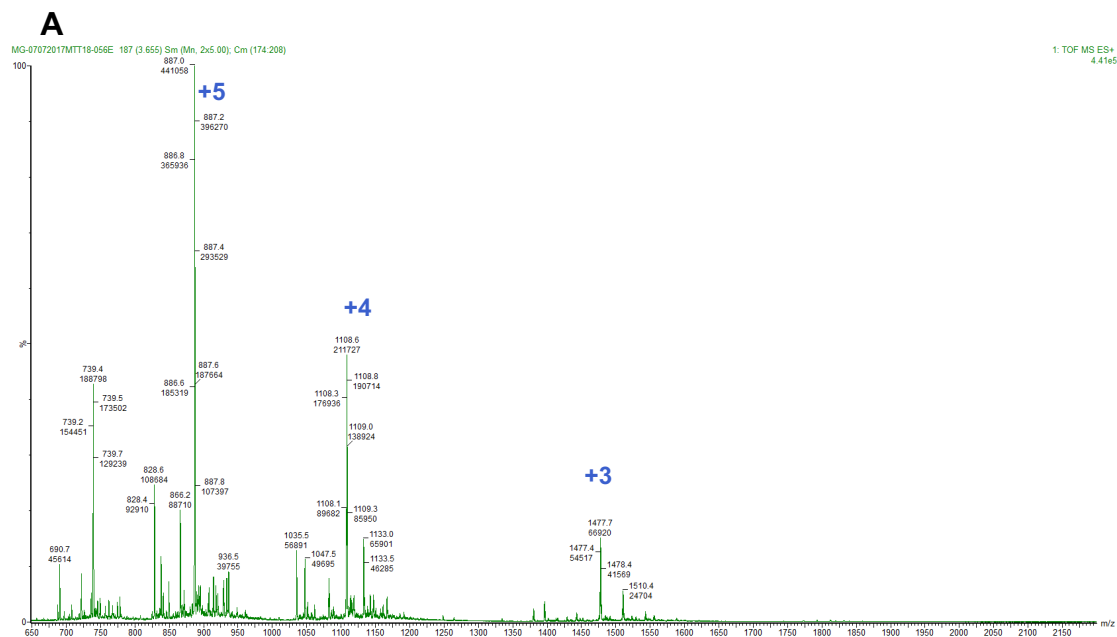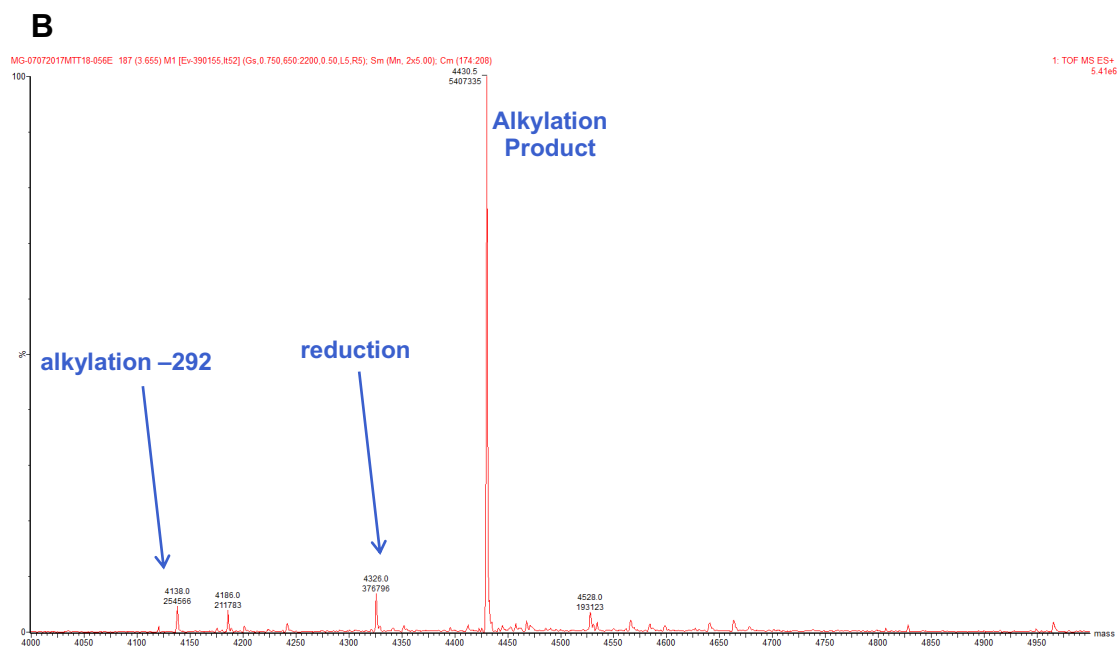

**Figure S61.** (A) Mass chromatogram of the crude reaction mixture of the photoalkylation of exenatide derivative **4g** and Hantzsch ester **14b**. (B) Deconvoluted mass chromatogram of the crude reaction mixture.

## Isolation of **18a**

Isolation of **18a** proceeded as follows: four alkylation reactions were performed in parallel, using the procedure described above on a 400  $\mu\text{L}$  reaction volume scale, a [conjugate] of 125  $\mu\text{M}$  and a 10 minute irradiation time. Following workup, purification was performed *via* reverse-phase HPLC (C18 column (150 x 10 mm, 5  $\mu\text{m}$ ), Gradient: 5-95% B over 16 min, then hold for 0.5 min, then 95-5%B over 0.5 min, hold for 2 min, 5 ml/min). The desired fractions were lyophilized to obtain **18a** as a sticky, faint-orange residue that was immediately redissolved in  $\text{H}_2\text{O}$  (200  $\mu\text{L}$ ) and stored at  $-20^\circ\text{C}$ . ICP-MS of the solution containing isolated conjugate **18a** indicated trace Ru levels of less than 1.5  $\mu\text{g}/\text{mL}$ .

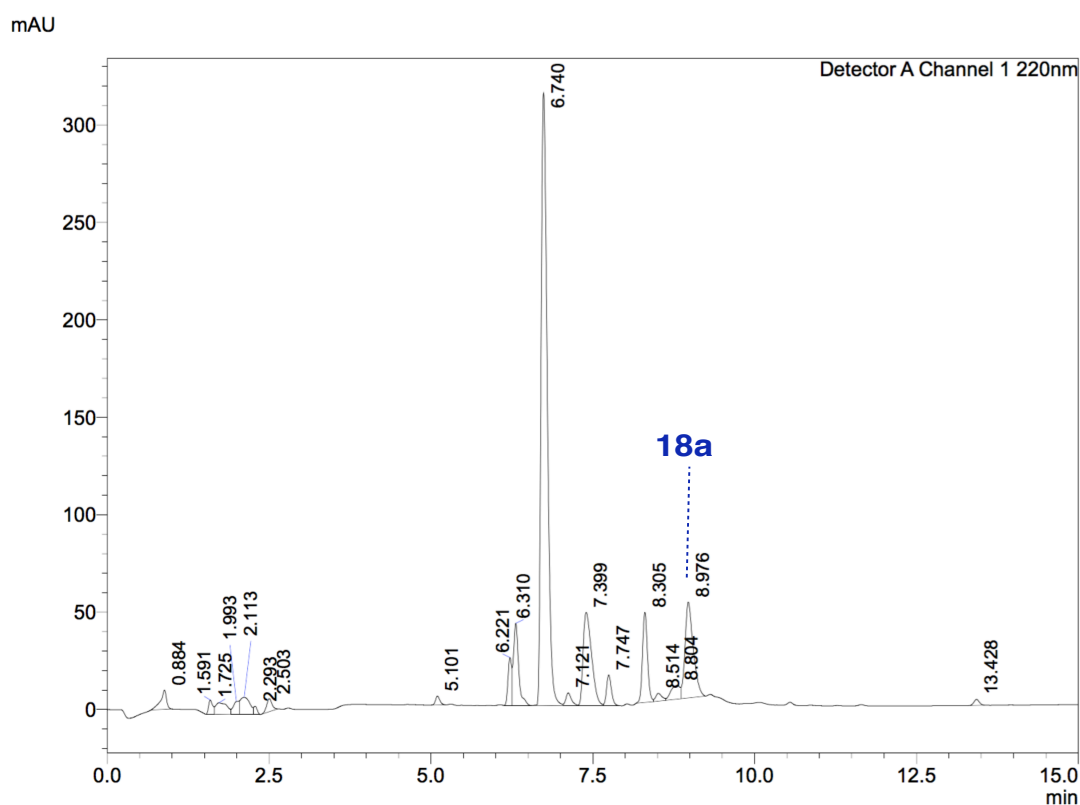

**Figure S62.** HPLC trace of the crude reaction mixture between **4g** and Hantzsch ester **14b**.

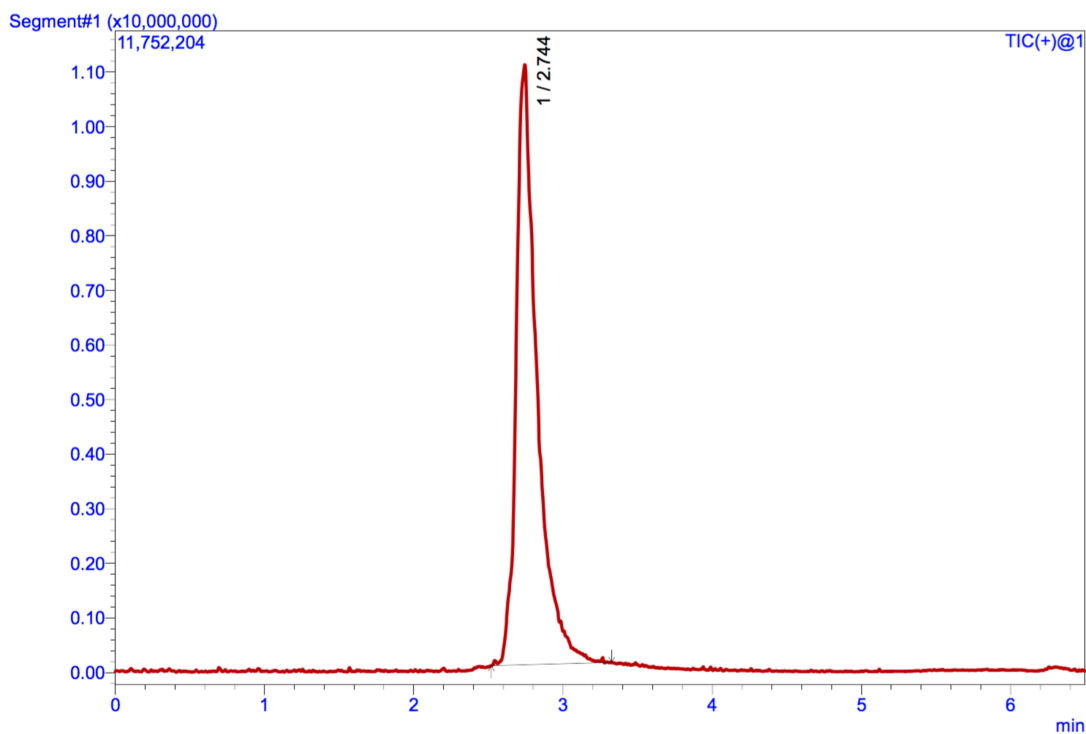

**Figure S63.** Mass trace of the lyophilized solid **18a**.

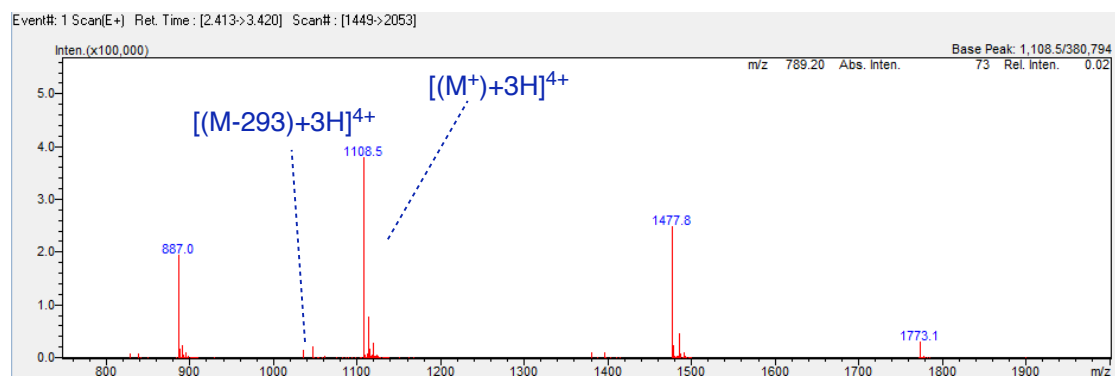

**Figure S64.** Mass chromatogram of the lyophilized solid **18a**. **18a** was found to contain ~5% free exenatide. Note that **18a** displays the diagnostic fragmentation pattern of cationic sulfur.



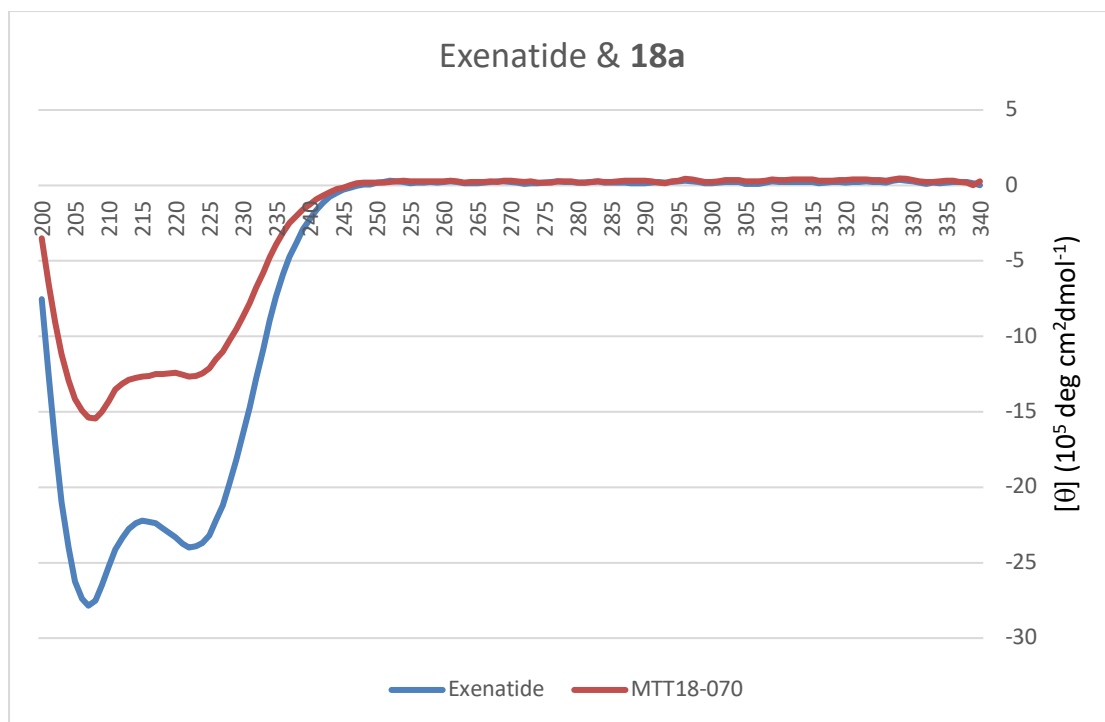

**Figure S65.** CD spectrum of **18a** (red line) and exenatide (blue line). This spectrum indicates that **18a** retains the structural characteristics of parent exenatide.

## Chymotrypsin digest and MSMS analysis of 18a

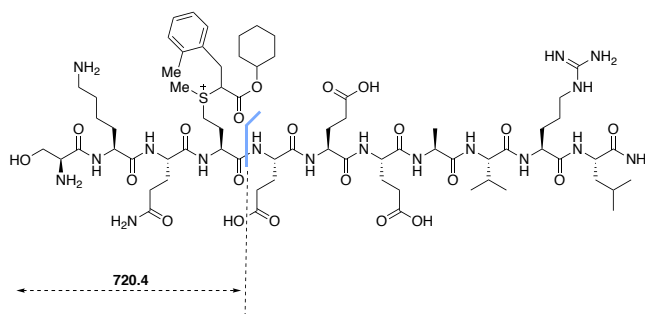

Variable modifications:

M4 : P172 JN MTT18 (M)

Ions Score: 49 Expect: 9.7e-05

Matches : 7/119 fragment ions using 8 most intense peaks [\(help\)](#)

| #  | Immon.   | b         | b <sup>++</sup> | b*        | b <sup>***</sup> | b <sup>0</sup> | b <sup>0++</sup> | Seq. | y         | y <sup>++</sup> | y*        | y <sup>***</sup> | y <sup>0</sup> | y <sup>0++</sup> | #  |
|----|----------|-----------|-----------------|-----------|------------------|----------------|------------------|------|-----------|-----------------|-----------|------------------|----------------|------------------|----|
| 1  | 60.0444  | 88.0393   | 44.5233         |           |                  | 70.0287        | 35.5180          | S    |           |                 |           |                  |                |                  | 11 |
| 2  | 101.1073 | 216.1343  | 108.5708        | 199.1077  | 100.0575         | 198.1237       | 99.5655          | K    | 1477.7845 | 739.3959        | 1460.7580 | 730.8826         | 1459.7739      | 730.3906         | 10 |
| 3  | 101.0709 | 344.1928  | 172.6001        | 327.1663  | 164.0868         | 326.1823       | 163.5948         | Q    | 1349.6895 | 675.3484        | 1332.6630 | 666.8351         | 1331.6790      | 666.3431         | 9  |
| 4  | 349.2070 | 720.3875  | 360.6974        | 703.3609  | 352.1841         | 702.3769       | 351.6921         | M    | 1221.6310 | 611.3191        | 1204.6044 | 602.8058         | 1203.6204      | 602.3138         | 8  |
| 5  | 102.0550 | 849.4301  | 425.2187        | 832.4035  | 416.7054         | 831.4195       | 416.2134         | E    | 845.4363  | 423.2218        | 828.4098  | 414.7085         | 827.4258       | 414.2165         | 7  |
| 6  | 102.0550 | 978.4727  | 489.7400        | 961.4461  | 481.2267         | 960.4621       | 480.7347         | E    | 716.3937  | 358.7005        | 699.3672  | 350.1872         | 698.3832       | 349.6952         | 6  |
| 7  | 102.0550 | 1107.5153 | 554.2613        | 1090.4887 | 545.7480         | 1089.5047      | 545.2560         | E    | 587.3511  | 294.1792        | 570.3246  | 285.6659         | 569.3406       | 285.1739         | 5  |
| 8  | 44.0495  | 1178.5524 | 589.7798        | 1161.5258 | 581.2666         | 1160.5418      | 580.7745         | A    | 458.3085  | 229.6579        | 441.2820  | 221.1446         |                |                  | 4  |
| 9  | 72.0808  | 1277.6208 | 639.3140        | 1260.5942 | 630.8008         | 1259.6102      | 630.3088         | V    | 387.2714  | 194.1394        | 370.2449  | 185.6261         |                |                  | 3  |
| 10 | 129.1135 | 1433.7219 | 717.3646        | 1416.6954 | 708.8513         | 1415.7113      | 708.3593         | R    | 288.2030  | 144.6051        | 271.1765  | 136.0919         |                |                  | 2  |
| 11 | 86.0964  |           |                 |           |                  |                |                  | L    | 132.1019  | 66.5546         |           |                  |                |                  | 1  |

Match to Query 4498: 1562.824056 from(391.713290,4+) intensity(13962992.0000) rtinseconds(2027) scans(11117) index(6222)  
Title: File4108 Spectrum6311 scans: 11117

Data file \\prot-filesvr1\data\CORE\RAW\_DATA\_2017\_QE\P172\_Jennifer\_Nelson\P172\_MTT18\_chymotrypsin\_digest.mgf

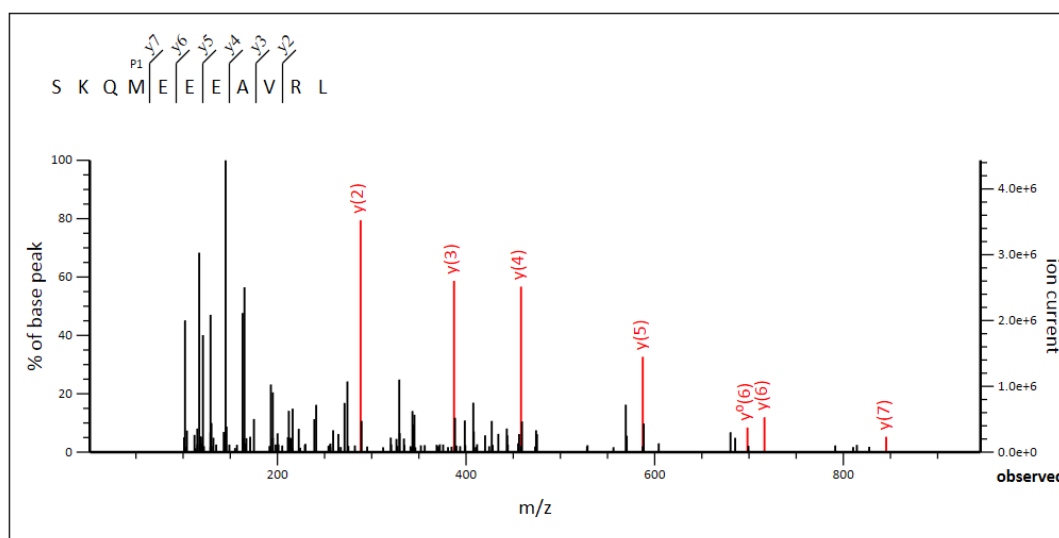

**Figure S66:** MSMS analysis of **18a**. Chymotrypsin digest fragmented exenatide conjugate **18a** to give a shorter peptide of sequence shown.  $y_7^+$  fragmentation shows the mass of the EEEAVRL fragment to be 845.44 Da. Hence, the remaining peptide fragment is 720.4 Da, confirming the presence of the modification on either of the SKQM residues.

## Stability Studies

### Stability study of exenatide diazoester conjugate **4a** in water

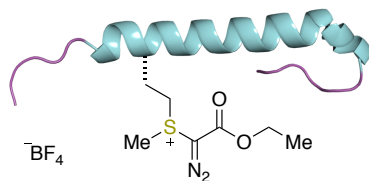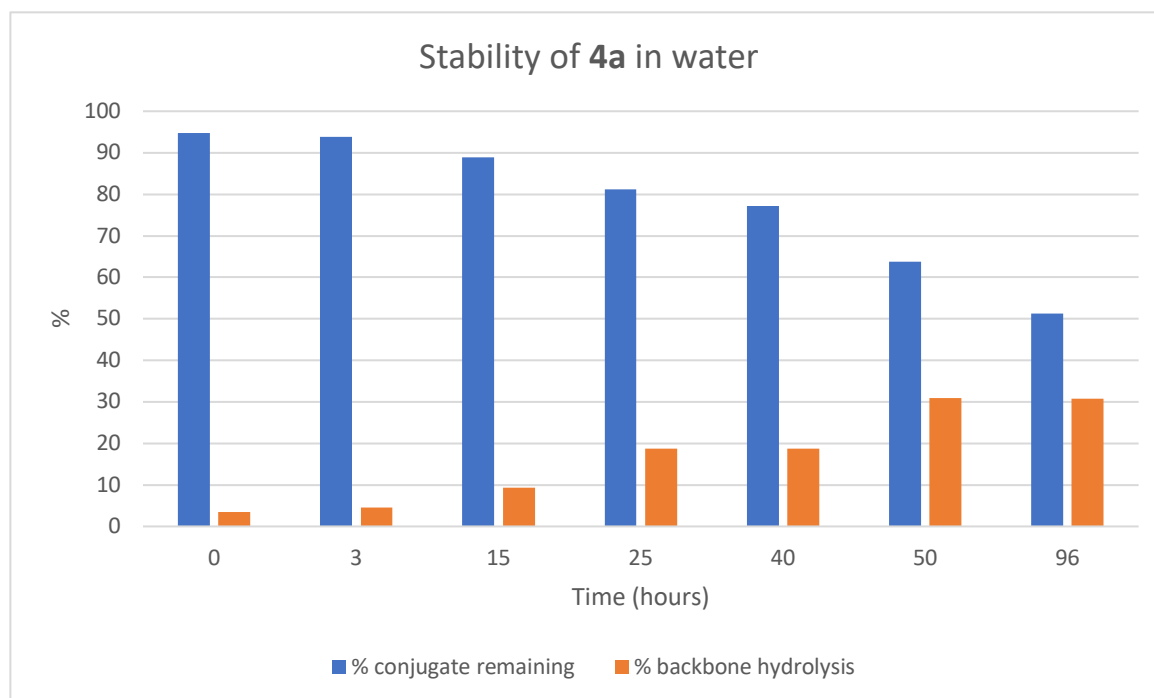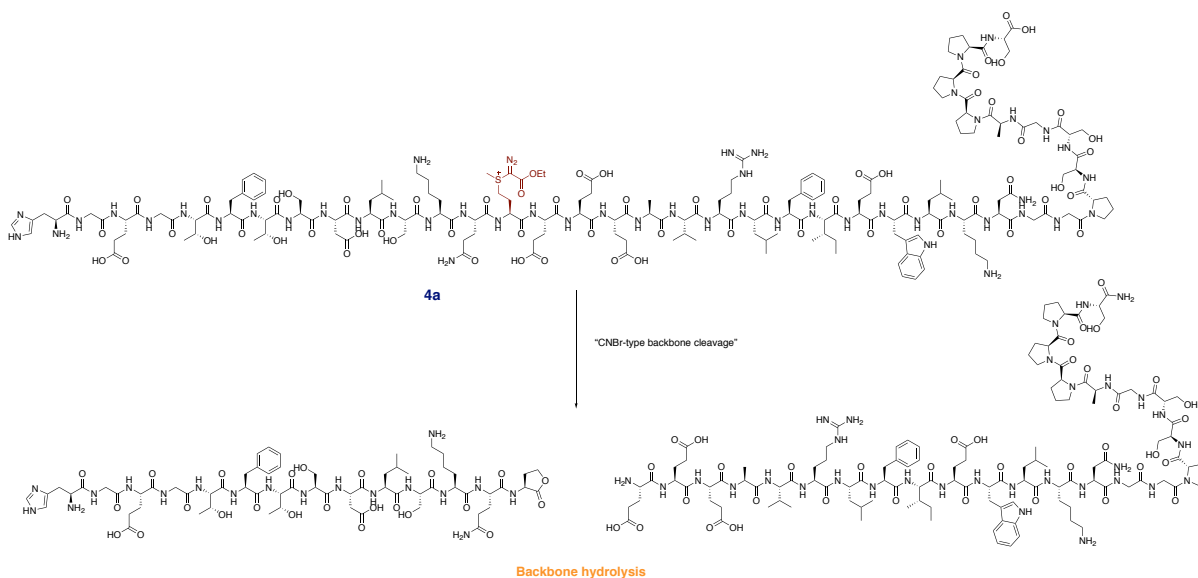

**Figure S67:** Stability study of **4a** in water, over a period of 96 hours, at room temperature.  $t = 0$  hours begins after storage of **4a** for 24 hours. Degradation occurs predominantly *via* backbone hydrolysis.

## Stability of exenatide diazoester conjugate **4b**

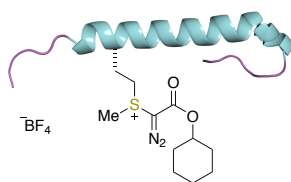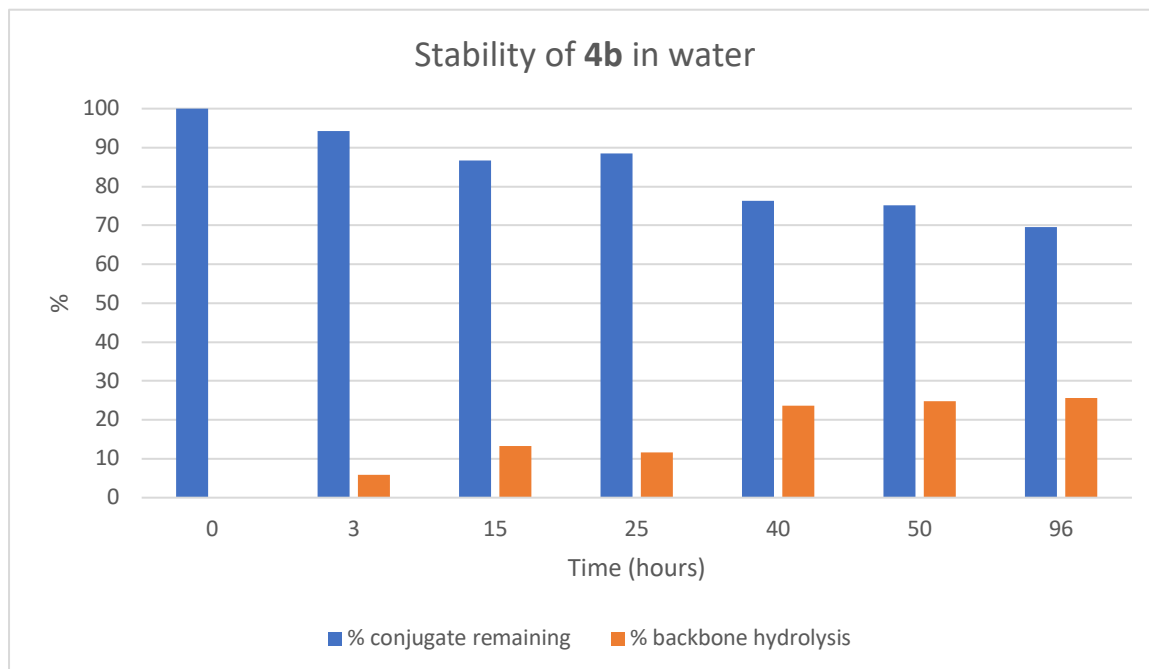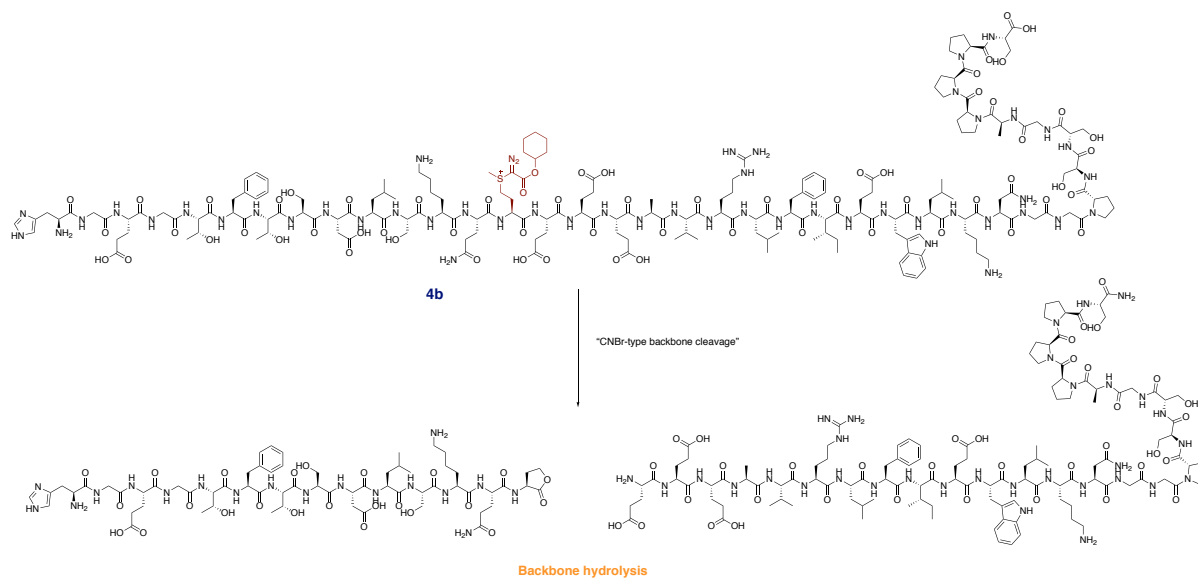

**Figure S68:** Stability study of **4b** in water, over a period of 96 hours, at room temperature. Degradation occurs predominantly *via* backbone hydrolysis.

## Stability study of exenatide diazoester conjugate **4f**

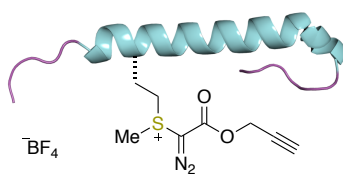

A general procedure used to analyze the stability of **4f** is as follows: To a solution of **4f** was added the solution containing the desired additive (final [**4f**] = 100  $\mu$ M), and was allowed to stand at room temperature. The solution was analyzed directly *via* LC/MS over the time course of the stability study.

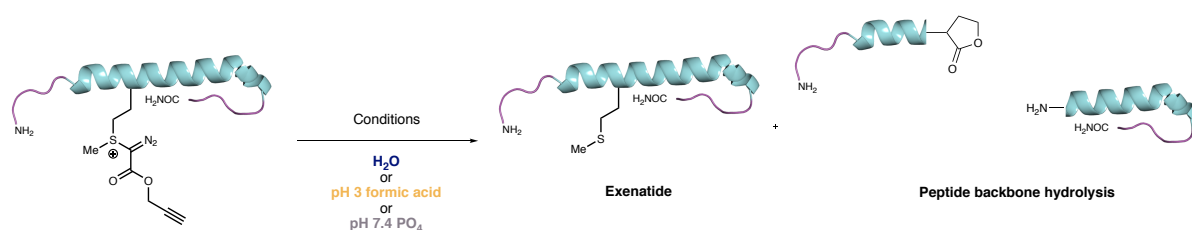

## Stability profile of propargyl ester **4f**

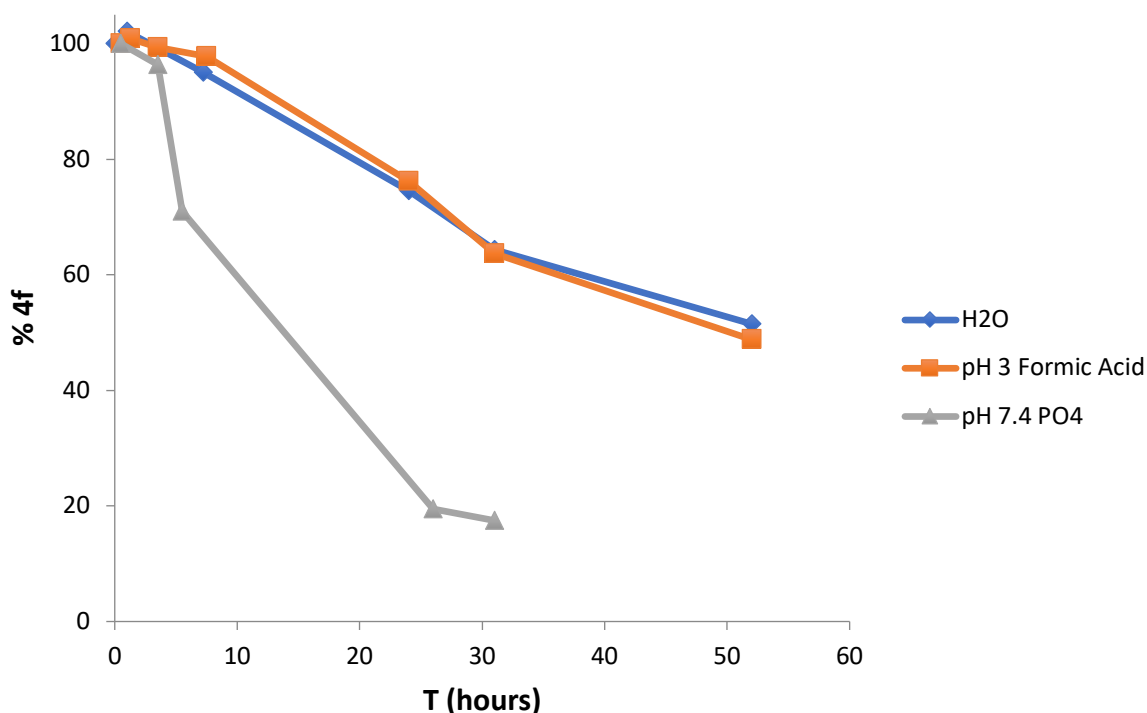

**Figure S69:** Stability profile of **4f**. For each experiment, **4f** (100  $\mu$ M) was allowed to stand in solution at room temperature (21°C) over the time course and analyzed by LCMS. **4f** degrades *via* a mixture of peptide backbone hydrolysis and label hydrolysis.

When we exposed **4f** to aqueous solutions of glutathione at 1 mM and 5 mM concentrations, the conjugate displayed partial stability over 8 hours. The primary reaction involved reduction of the diazo motif to the hydrazone. Although there is a chemical change, the methionine

residue remains labeled. Small amounts of peptide cleavage could also be observed but were not quantified. While these results highlight that the methionine conjugate is not stable for extended periods to GSH, it is notable that the label is not cleaved from the substrate. Tailoring the structure of the ester payload may enable us to influence the stability and studies towards this goal are ongoing. We note that the trialkylsulfonium variant of this conjugate (**17f**, **Figure S72**) is stable to glutathione.

## Stability of glucagon trialkylsulfonium conjugate **17e**

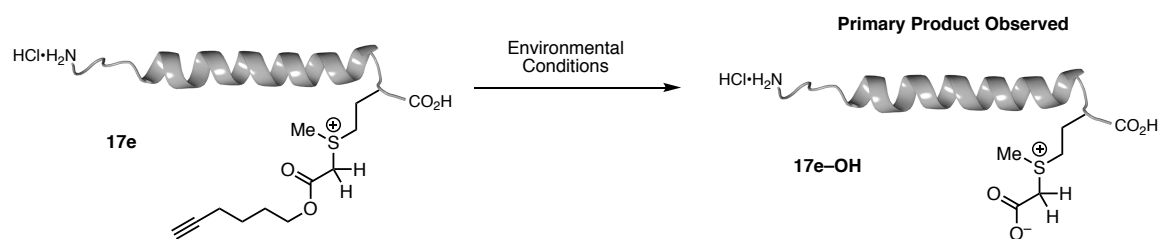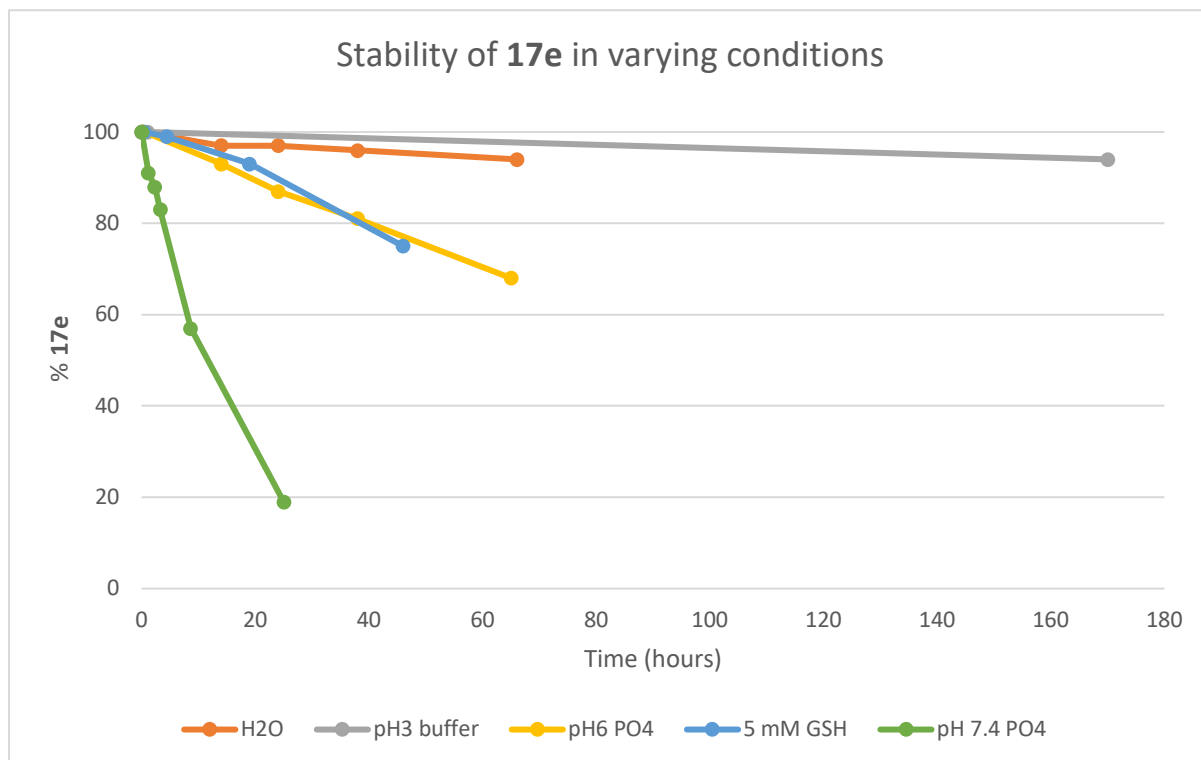

**Figure S70:** The stability profile of **17e**. For each experiment, **17e** (100  $\mu\text{M}$ ) was allowed to stand in solution at room temperature (21°C) over the time course and analyzed by LCMS. In all instances, degradation of **17e** occurs *via* the hydrolysis of the ester moiety to yield a free carboxylate.

## Stability of glucagon trialkylsulfonium conjugate **17c**

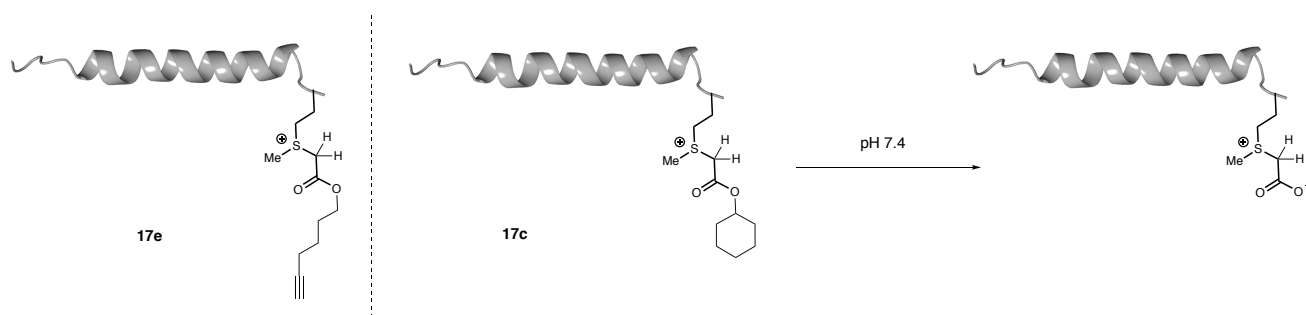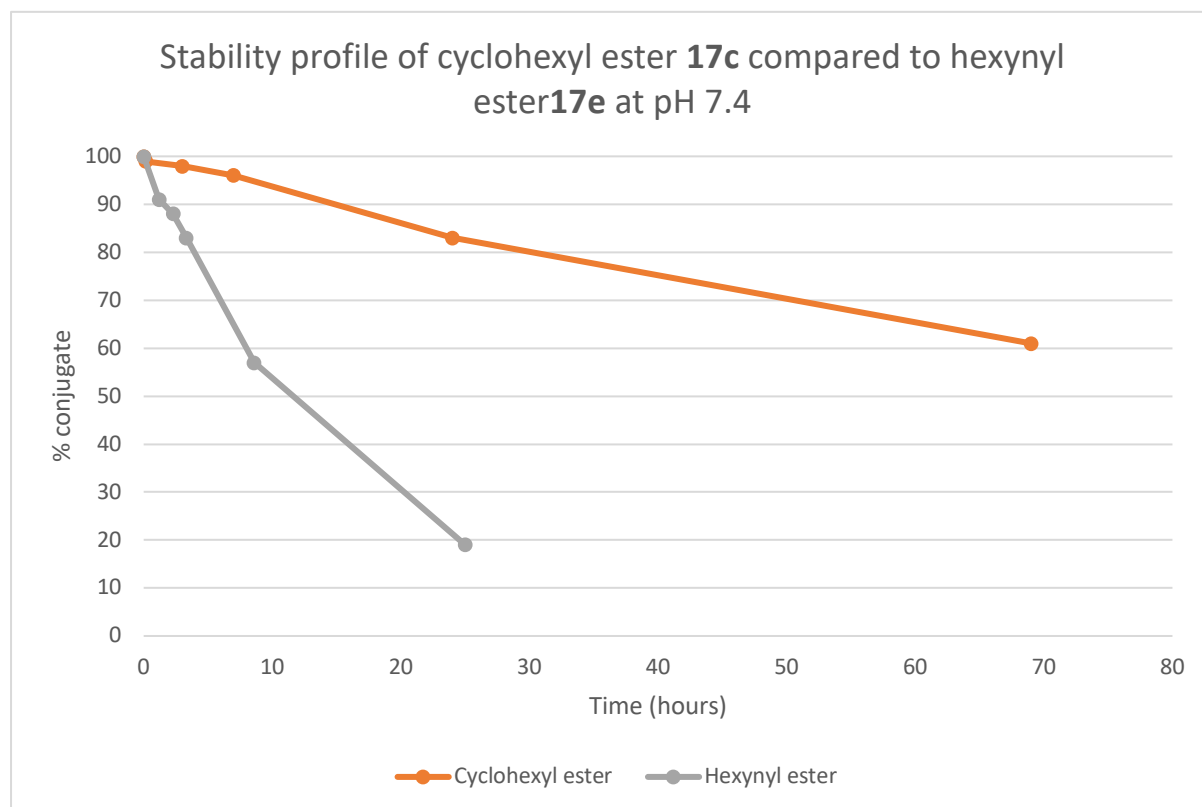

**Figure S71:** Stability profile of **17c** compared to **17e** at pH 7.4 phosphate buffer. The increased steric hindrance of the cyclohexyl ester significantly increases the half-life of the conjugate, from 10 hours to 90 hours. As with **17c**, **17e** decomposes exclusively *via* hydrolysis of the ester group to yield a free acid.



## Stability of exenatide trialkylsulfonium conjugate **17f** to glutathione

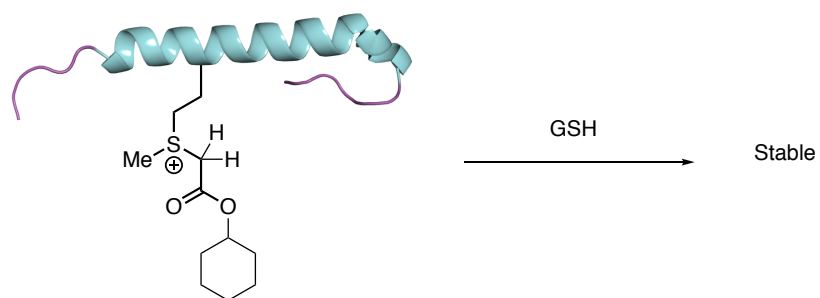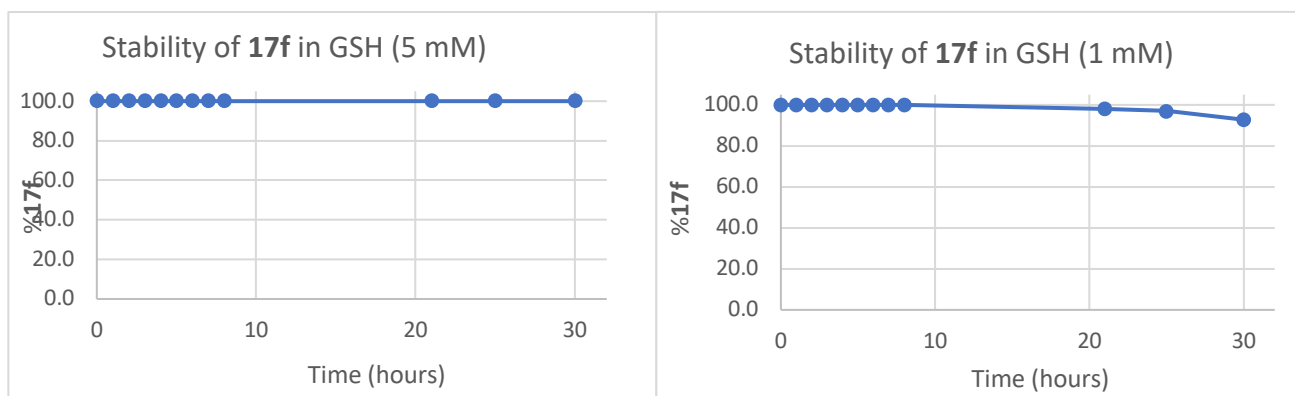

**Figure S72:** Stability profile of **17f** in the presence of glutathione. Small amount of ester hydrolysis observed (<5%) at t=30 hours.

## Mass-Spectral Characteristics of $\alpha$ -sulfonium diazoester-containing protein conjugates

Proteins and peptides that were functionalized in this study were characterized by analyzing their mass chromatograms (positive ionization mode) for a diagnostic fragmentation pattern that is well established with alkylated methionine residues<sup>8-10</sup>. Upon ionization, alkylated methionine residues can fragment at the  $C_\gamma$ -SR<sub>2</sub> bond to produce an [(M-SR<sub>2</sub>-H)+H]<sup>+</sup> ion in addition to the formation of the parent molecular ion [M]<sup>+</sup>. As this fragmentation pattern is unique to methionine, it can function as a key fingerprint for assigning reactivity at methionine residues. In most of our examples, we used this “sulfonium-fingerprint” as a key diagnostic that the protein modification was indeed occurring at methionine.

The  $\alpha$ -sulfonium diazoesters generated in this study display this diagnostic fragmentation. This is exemplified by **3b**, which was isolated in >90% purity and characterized by <sup>1</sup>H- and <sup>13</sup>C-NMR and IR spectroscopy. The <sup>1</sup>H NMR clearly shows **3b** as a **single pure product**. ESI-MS of **3b** clearly displays this fragmentation of [M]<sup>+</sup> (319.1061 M/Z) and [(M-SR<sub>2</sub>)+H]<sup>+</sup> (159.0760 M/Z) (**Figure S73**), showing that this fragment is **created upon ionization in the mass spectrometer** rather than a real species present in the isolated sample of **3b**.

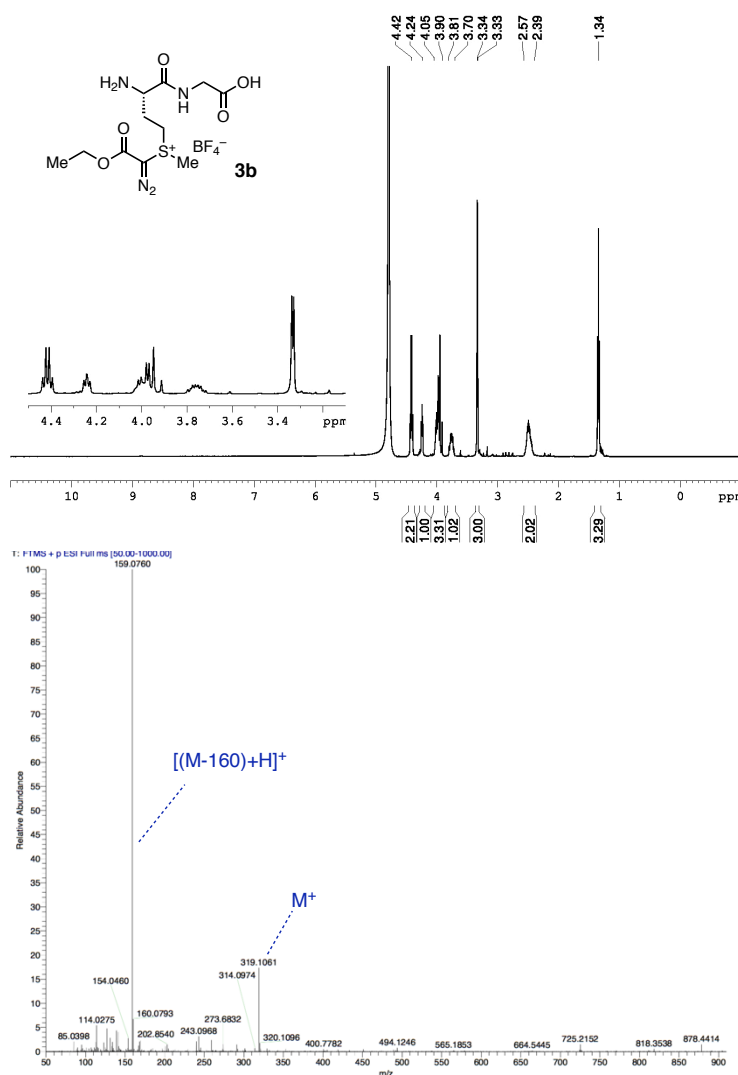

**Figure S73:** <sup>1</sup>H NMR and mass spectrum of purified small molecule diazoester conjugate **3b**

The same fragmentation pattern is observed for the peptide and protein conjugates involved in this study. A number of key experiments differentiate this fragmentation pattern from the possible intramolecular displacement decomposition pathway (“cyanogen bromide type”) reactivity.

Compare the two mass traces from **4a** and **4d** (**Figure S74**). Due to the non-polar aliphatic chain, **4d** elutes at a much later retention time (3.80 min) than **4a** (2.75 min) under identical conditions. Yet, in the peaks corresponding to both **4a** and **4d**, at differing retention times, the identical fragmentation pattern is observed (1035.4, 1380.4 etc.). Cyanogen bromide-type cleavage of both these conjugates would yield identical products, which **should have identical retention times**, yet this is not observed.

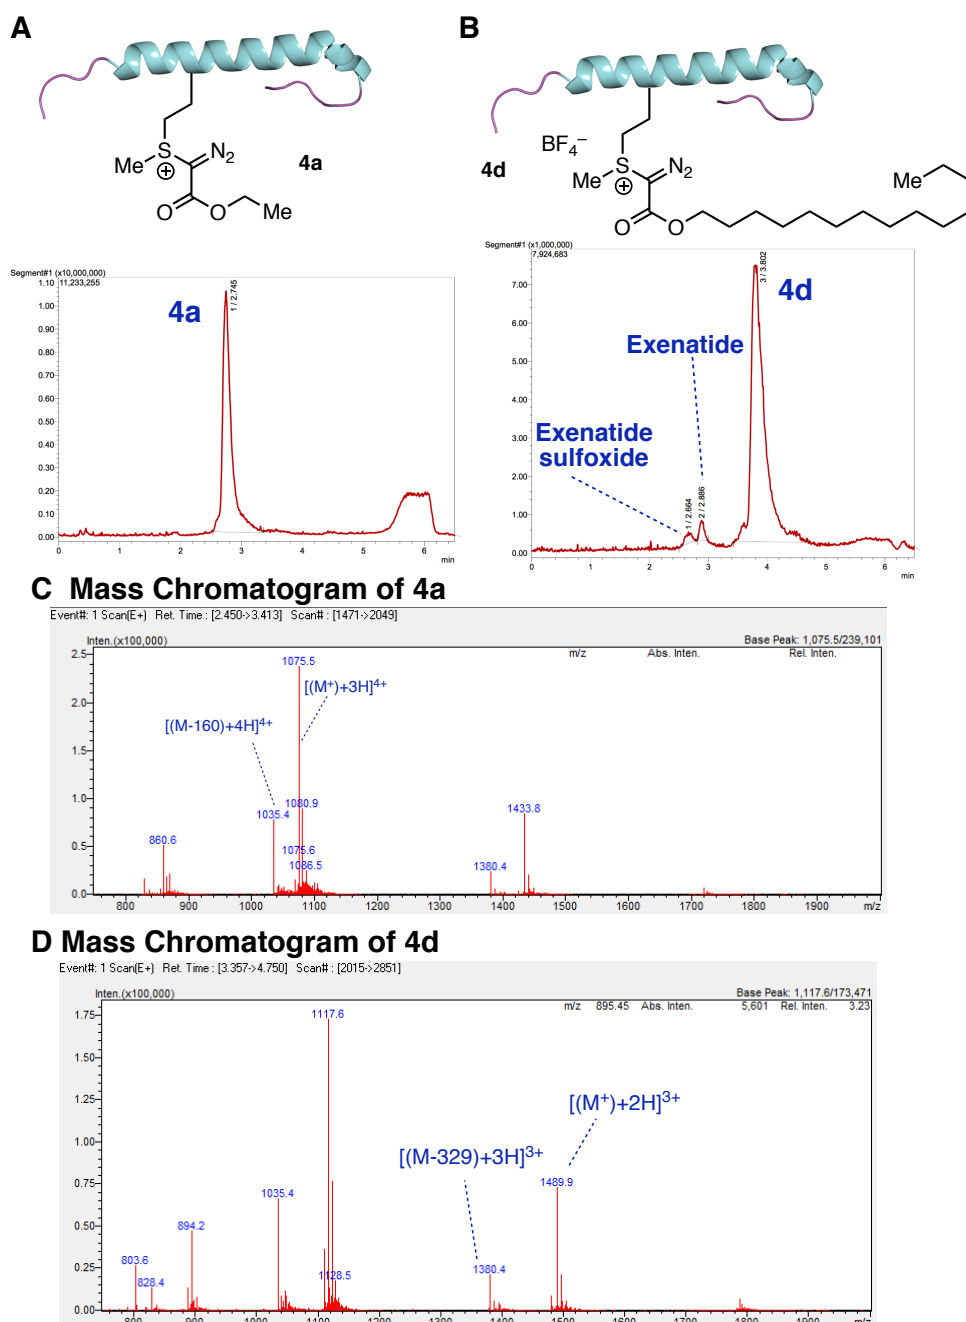

**Figure S74:** Exenatide ethyl ester **4a** and myristyl ester **4d** conjugates and mass traces

This effect is also clearly illustrated in the stability assays of glucagon conjugate **17c**. Over time, **17c** hydrolyses to form **17c-OH**, as depicted in **Figure S75**. **17c** and **17c-OH** both display the sulfonium fingerprint (**Figure S75-A&B**), and a mass-based search of  $m/z=859$  (**Figure S75-C**), definitively shows that this fragmentation pattern is associated with the two different compounds, at two **different retention times**.

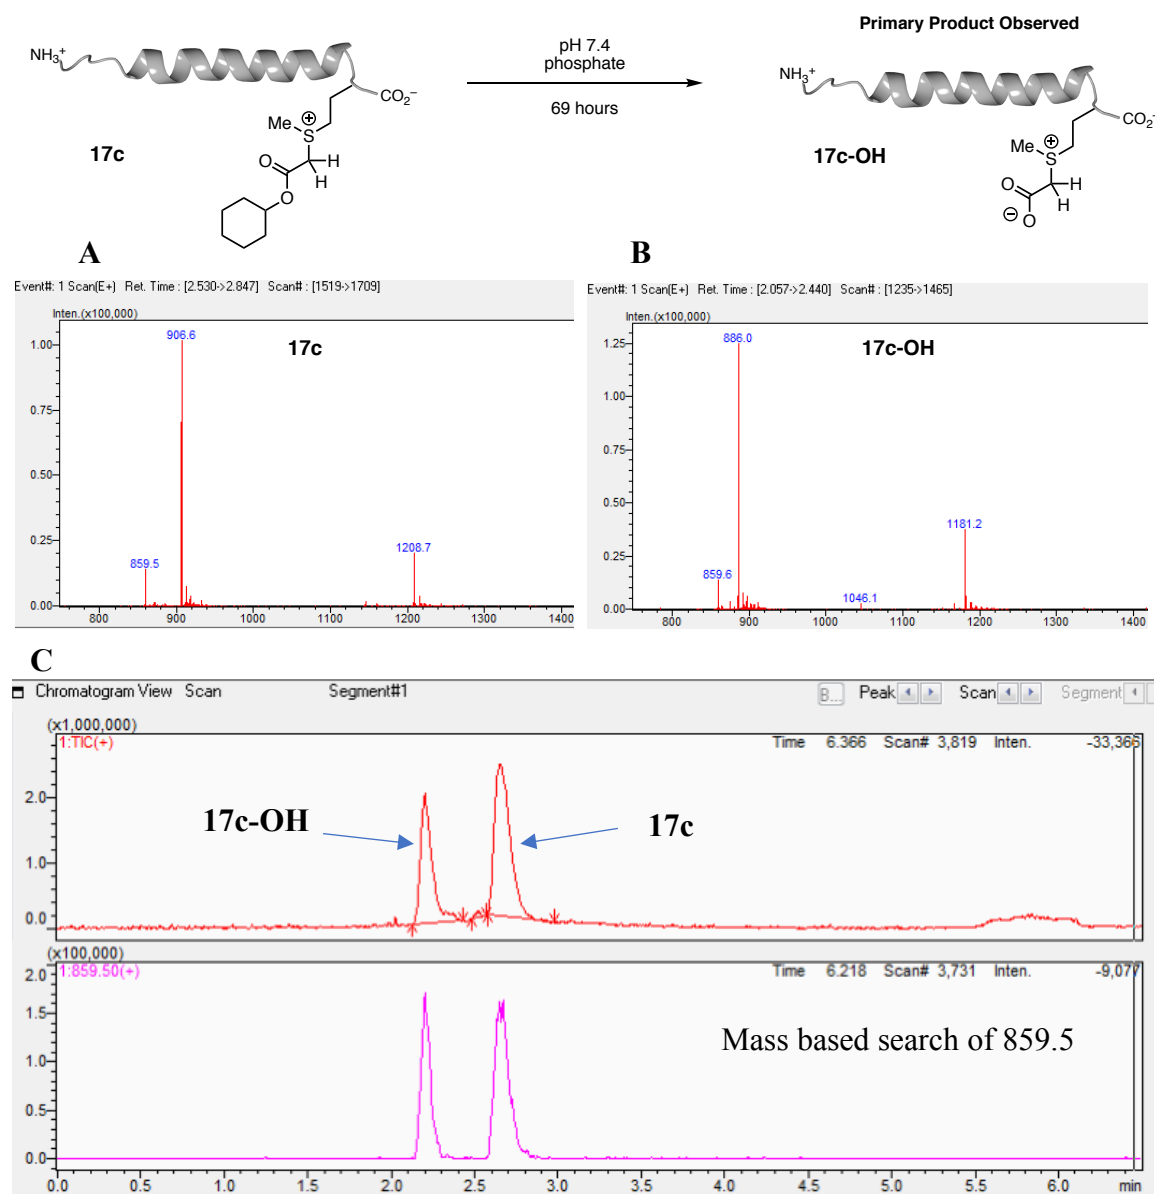

**Figure S75:** (A) Mass trace of glucagon cyclohexyl conjugat **17c**. (B) Mass trace of glucagon hydrolysis product **17c-OH**. (C) Mass based search of fragment ion (MW = 859.5), showing the fragment ion is present in both compounds **17c** and **17c-OH**, both of which elute at different retention times.

Finally, reducing the  $\alpha$ -sulfoniumdiazoester **5** followed by subsequent hydrolysis releases free methionine (**Figure S76**). Upon hydrolysis, the  $[(M-SR_2)+H]^+$  peak disappears completely. If the  $[(M-SR_2)+H]^+$  peaks were the result of iminolactone formation, then it would be expected that these peaks either 1) **should not be affected by the reduction** or 2) should **hydrolyze** to form subsequent lactone and free amine in equally appreciable intensities. Instead, we see complete disappearance of this ion and **reformation of free peptide** in excellent purity,

indicating this ion is merely **formed upon ionization** rather than a species which is present in isolated samples.

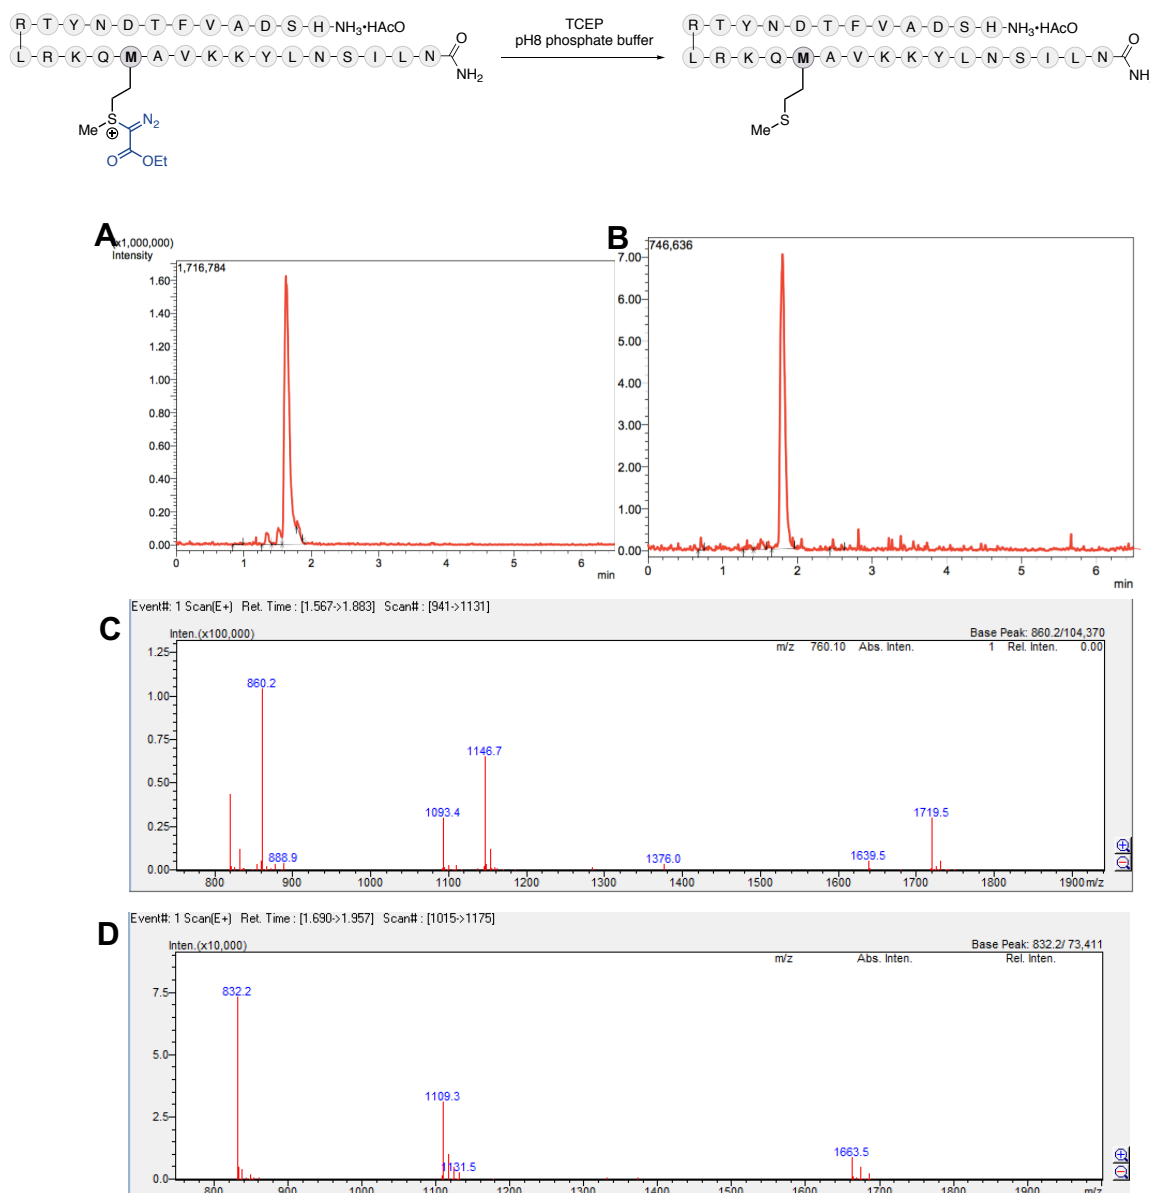

**Figure S76.** (A) Mass trace of **5**. (B) Mass trace of the crude mixture between **5** and TCEP at pH 8. (C) Mass spectrum of **5** (positive ionization mode, TIC from T<sub>r</sub>=1.57-1.88 min.) (D) Mass spectrum of the crude mixture between **5** and TCEP at pH 8 (positive ionization mode, TIC from T<sub>r</sub>=1.69-1.96 min.) showing full conversion to free aviaptadil.

Similarly, this can be observed in the case of Teriparatide in which two methionine residues are labelled. Fragment ions for the [(M-SR<sub>2</sub>)+H]<sup>+</sup> and [(M-2(SR<sub>2</sub>))+H]<sup>+</sup> are observed (**Figure S77**). Both of these **ions disappear on reduction** with TCEP, with only free teriparatide observed. If these ions were due to iminolactone, they would still be present after reduction, or would be present as lactone and free amine peptide fragments which would be observed in the mass spectrum.

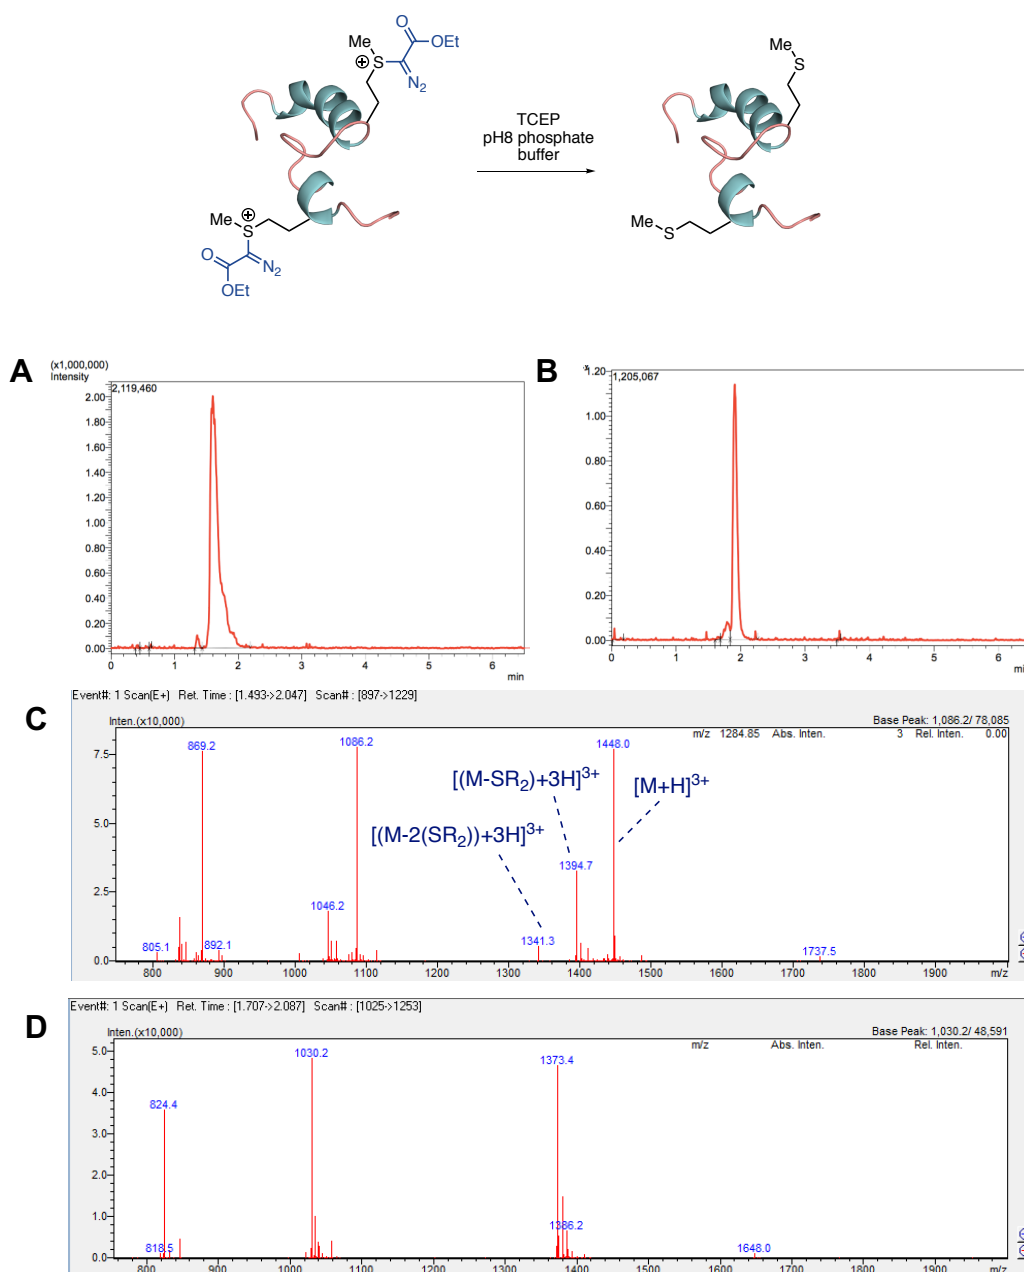

**Figure S77.** (A) Mass trace of **8**. (B) Mass trace of the crude mixture between **8** and TCEP at pH 8. (C) Mass spectrum of **8** (positive ionization mode, TIC from T<sub>r</sub>=1.49-2.05 min.) (D) Mass spectrum of the crude mixture between **8** and TCEP at pH 8 (positive ionization mode, TIC from T<sub>r</sub>=1.71-2.09 min.) showing full conversion to free teriparatide.

The same affect was observed with Ubiquitin (**Figure S78**). After methionine labelling, Ubiquitin conjugate **11** (8678 Da) displays a dramatic fragmentation upon ionization, wherein the major peak observed is the [(M-SR<sub>2</sub>)-H]<sup>+</sup> mass peak (8517 Da). Upon treatment with 30 mM TCEP in pH 8 phosphate buffer, **11** is reverted back to free Ubiquitin (8565 Da) in >90% conversion, and **no elimination products/hydrolysis of the peptide backbone are observed**.



## Cyanogen bromide mediated backbone cleavage of Aviptadil

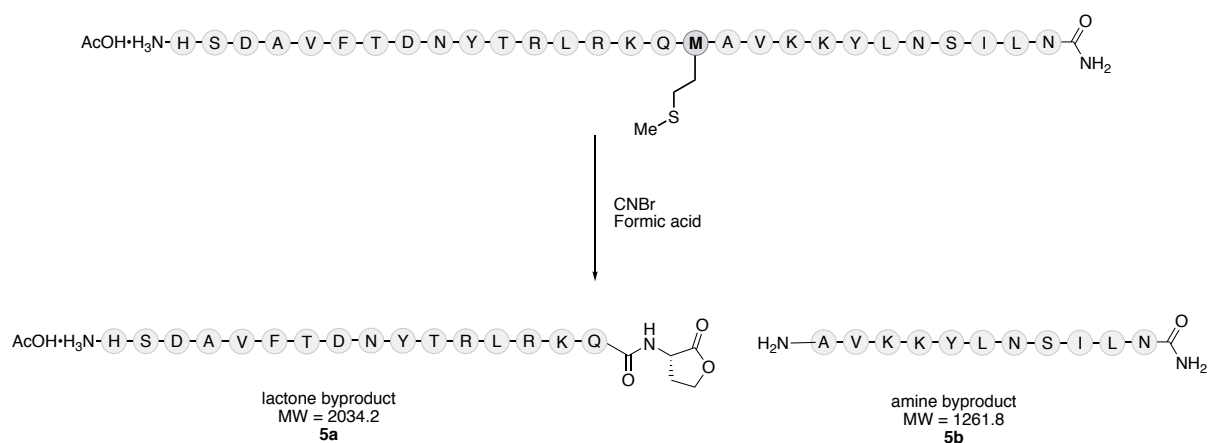

Aviptadil (1.1 mg, 0.33  $\mu$ mol) was added to a 2 mL vial equipped with a magnetic stirrer. To the vial was added a solution of cyanogen bromide (8.5 mg, 83  $\mu$ mol) in formic acid (200  $\mu$ L). The resulting solution was stirred at room temperature for 2 hours. The solution was diluted with water then analyzed directly *via* LC/MS (C18 column (50 x 2.1 mm, 2.6 $\mu$ m), Gradient: 5-95% B over 5 min then hold for 0.5 min, 0.7 ml/min), and was judged to have proceeded in >95% conversion to cleavage products **5a** and **5b**.



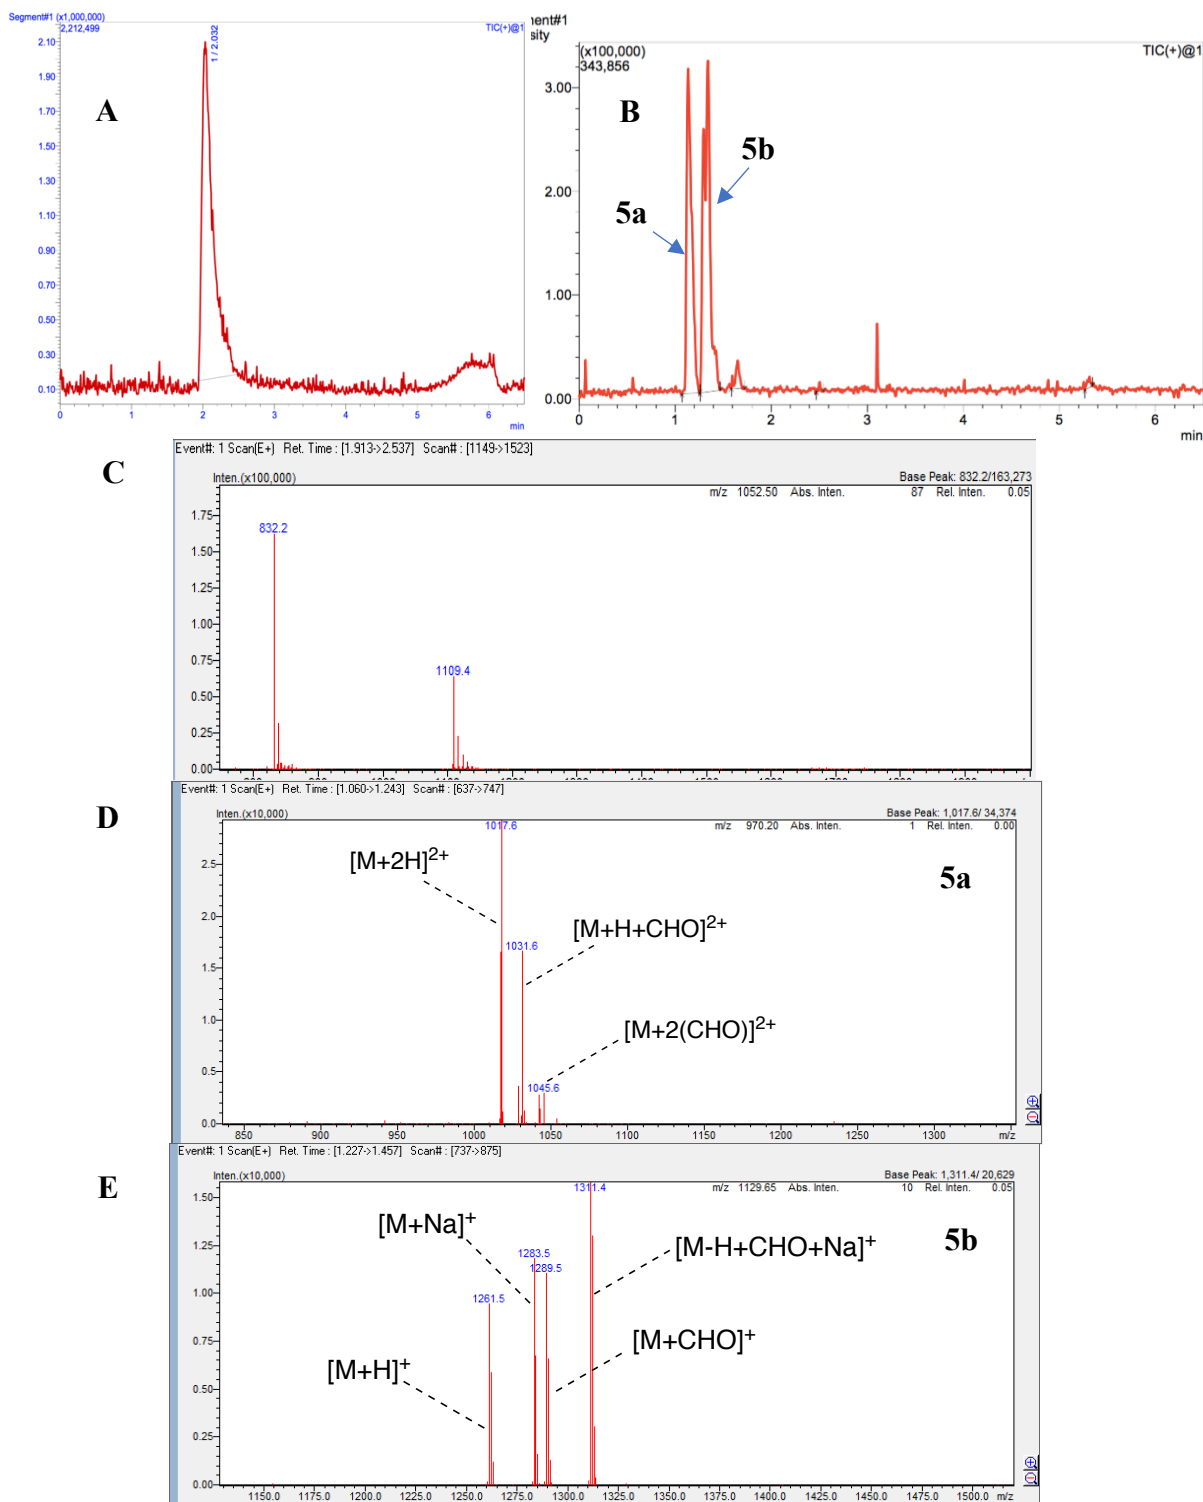

**Figure S79:** (A) Mass trace of Aviptadil (B) Mass trace of crude reaction between Aviptadil with CNBr. (C) Mass spectrum of Aviptadil. (D) Mass spectrum of crude reaction mixture, showing peak 1 (positive ionization mode, TIC from T<sub>r</sub>=1.060-1.243 min.) (E) Mass spectrum of crude reaction mixture, showing peak 2 (positive ionization mode, TIC from T<sub>r</sub>=1.227-1.457 min.)

## Mass-based search for products resulting from ‘cyanogen bromide-type’ backbone cleavage

Cyanogen bromide-type cleavage of the peptide backbone of aviptadil would give resulting lactone and amine-derived byproducts **5a** and **5b**. A mass based search of these byproducts (amine byproduct **5b**  $[M+H]^+ = 1261.8$  and lactone byproduct **5a**  $[M+2H]^{2+} = 1017.8$ ) on the crude reaction mixture showed no evidence of the presence of these backbone hydrolysis products (**Figure S80**).

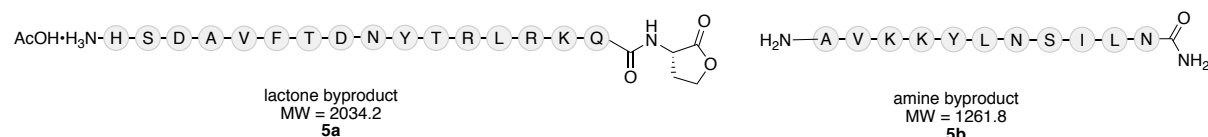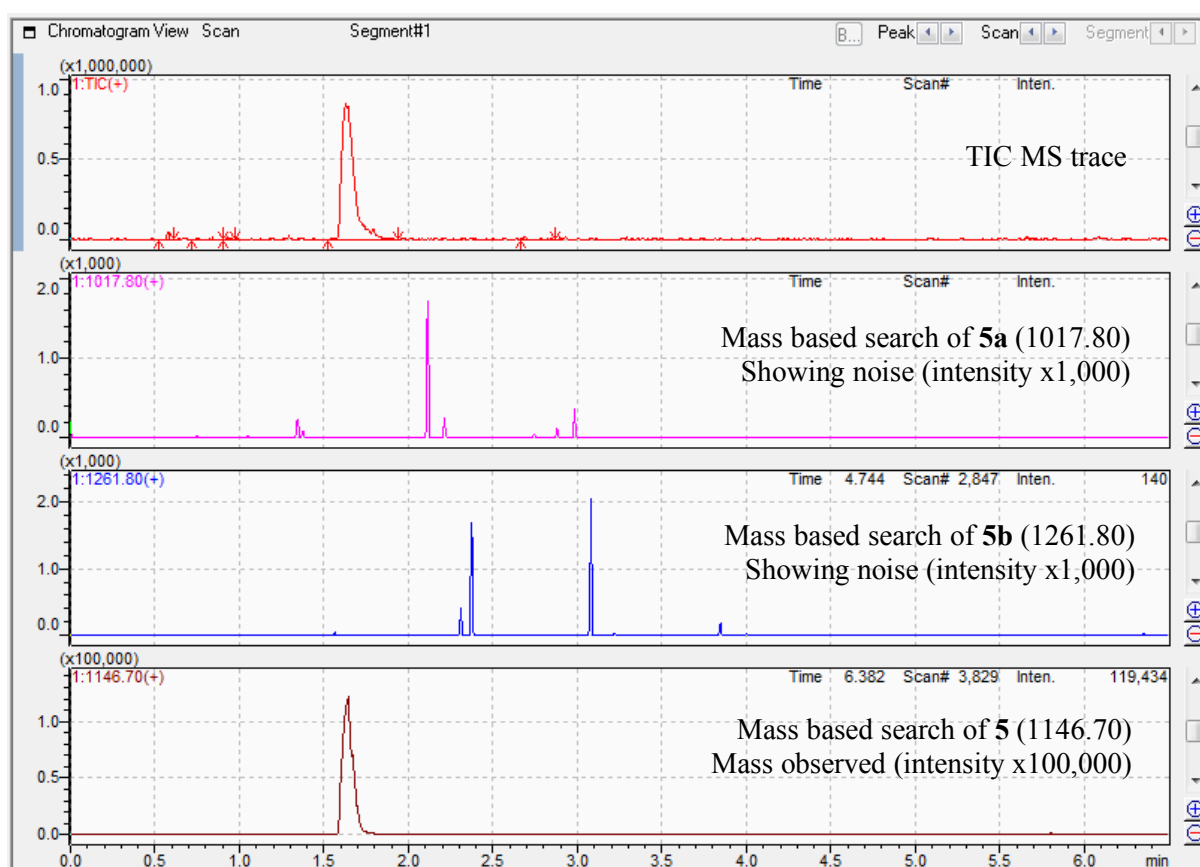

**Figure S80:** Mass based search on mass trace of crude reaction to form aviptadil conjugate **5**. Search for backbone hydrolysis products (amine byproduct **5b**  $[M+H]^+ = 1261.8$  and lactone byproduct **5a**  $[M+2H]^{2+} = 1017.8$ ) shows only noise, whilst search for one of the product ions of **5** ( $[(M^+)+2H]^{3+} = 1146.7$ ) clearly shows the presence of aviptadil conjugate **5**.

Aviptadil conjugate **5** was then subjected to reverse phase HPLC purification and subsequent lyophilisation overnight to yield an isolated sample of **5**. A mass based search of the products of cyanogen bromide-type cleavage of the peptide backbone (amine byproduct **5b**  $[M+H]^+ = 1261.8$  and lactone byproduct **5a**  $[M+2H]^{2+} = 1017.8$ ) on the isolated sample of **5** showed a small amount of the presence of these backbone hydrolysis products (**Figure S81**).

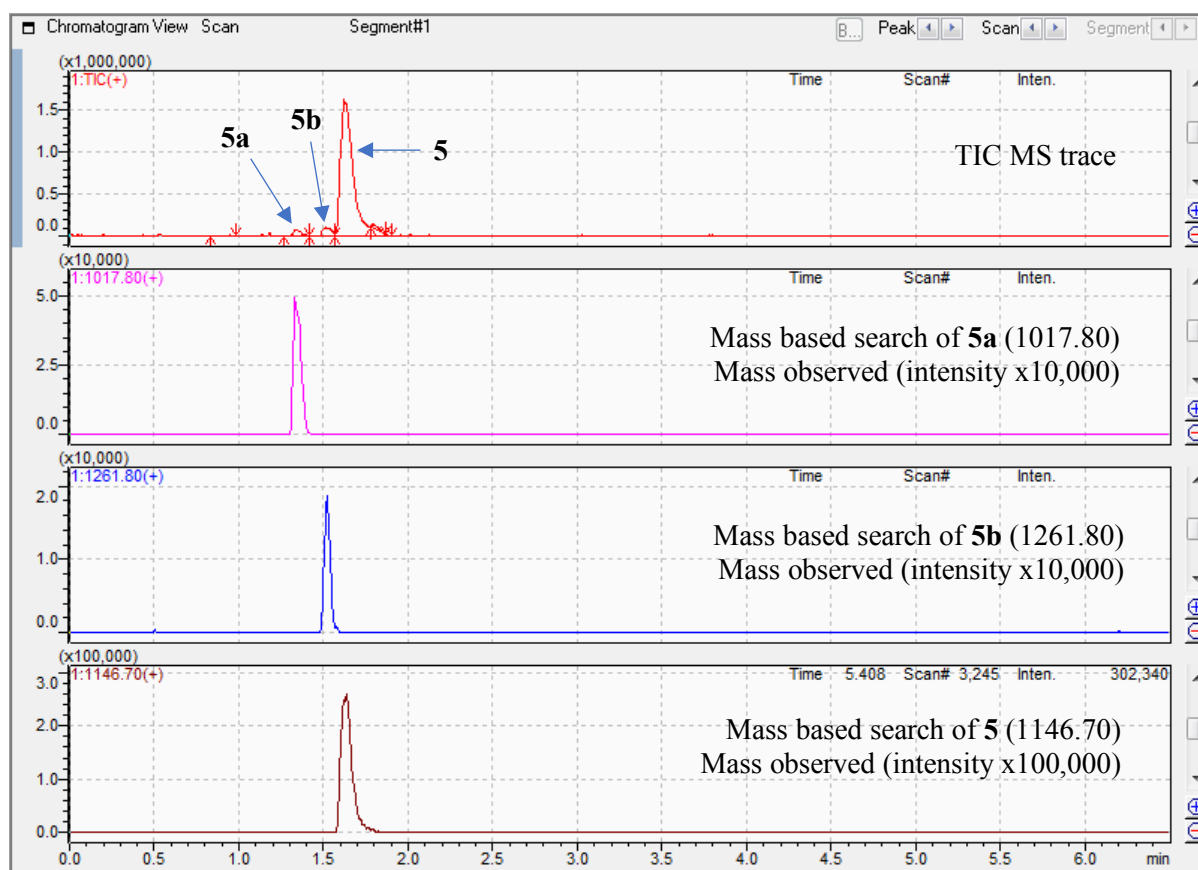

**Figure S81:** Mass based search on mass trace of isolated aviptadil conjugate **5**. Search for backbone hydrolysis (amine byproduct **5b**  $[M+H]^+ = 1261.8$  and lactone byproduct **5a**  $[M+2H]^{2+} = 1017.8$ ) shows presence of these byproducts. Search for product ion of **5** ( $[(M^+)+2H]^{3+} = 1146.7$ ) also shows the presence of aviptadil conjugate **5**. Note the difference in intensity of a factor of 10 between backbone hydrolysis byproducts and conjugate **5**, and additionally the differing retention time from the conjugate **5**.

Cyanogen bromide-type cleavage of the peptide backbone of exenatide would give resulting lactone and amine-derived byproducts **4'** and **4''**. A mass based search of these byproducts (amine byproduct **4''**  $[M+2H]^{2+} = 1334.5$  and lactone byproduct **4'**  $[M+H]^+ = 1489.6$ ) on the crude reaction mixture showed no evidence of the presence of these backbone hydrolysis products (**Figure S82**).

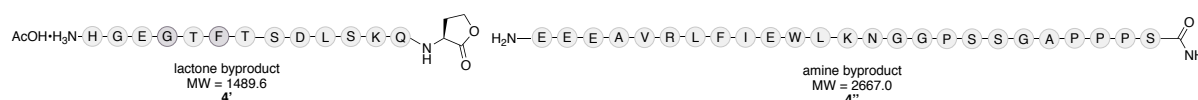

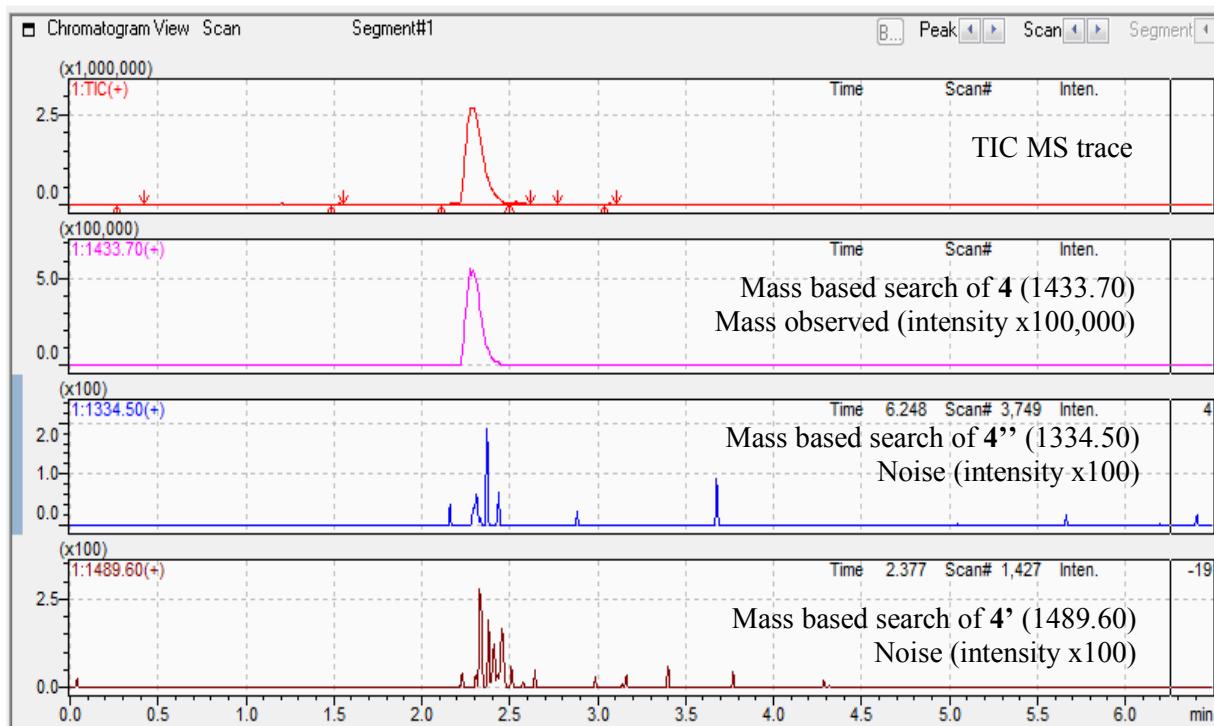

**Figure S82:** Mass based search on mass trace of crude reaction to form exenatide conjugate **4a**. Search for backbone hydrolysis products (amine byproduct **4''**  $[M+2H]^{2+} = 1334.5$  and lactone byproduct **4'**  $[M+H]^+ = 1489.6$ ) shows only noise, whilst search for one of the product ions of **4a** ( $[(M^+)+2H]^{3+} = 1433.7$ ) clearly shows the presence of exenatide conjugate **4a**.

In the same manner as the aviptadil conjugate **5**, exenatide conjugate **4a** was then subjected to reverse phase HPLC purification and subsequent lyophilisation overnight to yield an isolated sample of **4a**. A mass based search of the products of cyanogen bromide-type cleavage of the peptide backbone (amine byproduct **4''**  $[M+2H]^{2+} = 1334.5$  and lactone byproduct **4'**  $[M+H]^+ = 1489.6$ ) on the isolated sample of **4a** still showed no presence of these backbone hydrolysis products (**Figure S83**). Backbone hydrolysis products in this case are only observed after a number of hours at room temperature (see stability study **Figure S67**).

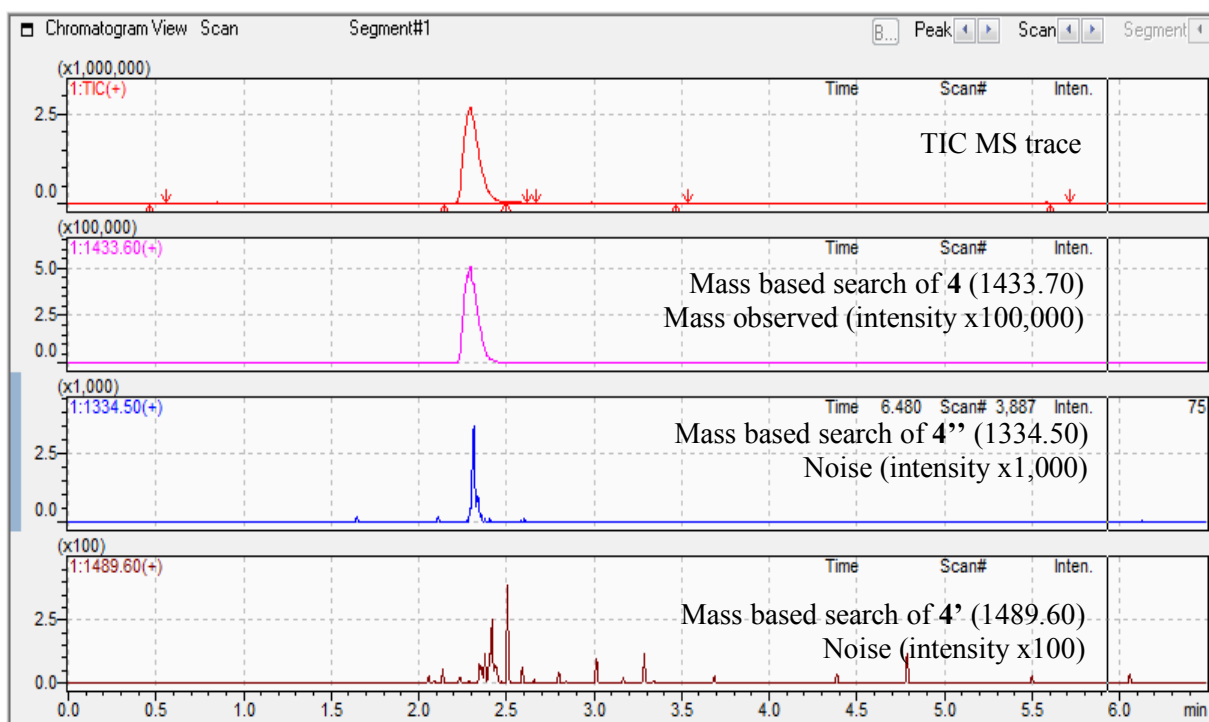

**Figure S83:** Mass based search on mass trace of isolated exenatide conjugate **4a**. Search for backbone hydrolysis (amine byproduct **4''**  $[M+2H]^{2+} = 1334.5$  and lactone byproduct **4'**  $[M+H]^+ = 1489.6$ ) shows no presence of these byproducts. Search for product ion of **4a** ( $[(M^+)+2H]^{3+} = 1146.7$ ) shows the presence of exenatide conjugate **5a**

## References

- 1) Furuya, T.; Kaiser, H.M.; Ritter, T. *Angew. Chem. Int. Ed.* **2008**, 47, 5993.
- 2) Suero, M.G.; Bayle, E.D.; Collins, B.S.L.; Gaunt, M.J. *J. Am. Chem. Soc.*, **2013**, 135, 5332–5335.
- 3) Ideue, E.; Toma, T.; Shimokawa, J.; Fukuyama, T. *Org. Synth.* **2012**, 89, 501.
- 4) Brunet, A.; Aslam, T.; Bradley, M. *Bioorg. Med. Chem. Lett.* **2014**, 24, 3186.
- 5) Dhaon, M.K.; Olsen, R.K.; Ramasamy, K. *J. Org. Chem.* **1982**, 47, 1962.
- 6) Weiss, R.; Seubert, J.; Hampel, F. *Angew. Chem. Int. Ed.* **1994**, 33, 1952.
- 7) <http://www.waters.com/webassets/cms/library/docs/an212.pdf>
- 8) Lapko, V.N.; Smith, D.L.; Smith, J.B. *J. Mass Spectrometry.* **2000**, 35, 572.
- 9) Reid, G.E.; Roberts, K.D.; Simpson, R.J. O’Hair, R.A.J. *J. Am. Mass Spectrom.*, **2005**, 16, 1131.
- 10) Gharakhanian, E.G.; Deming, T.J. *Chem. Commun.* **2016**, 52, 5336
- 11) *Diazo Compounds: Properties and Synthesis*. Regitz, M.; Maas, G. Academic Press, Orlando, Fla. **1986**.
- 12) Nguyen, H.P.; Znifeche, S.; Baboulene, M. *Synthetic Commun.* **2004**, 34, 2085.
- 13) Zhang, J. *AAPS PharmSciTech.* **2015**, 17, 1014.
- 14) Trost, B.M.; Ball, Z.T.; Laemmerhold, K.M. *J. Am. Chem. Soc.* **2005**, 127, 10028.
